# Supplementary material for: Acetic acid promoted tandem cyclization of in situ generated 1,3-dipoles: stereoselective synthesis of dispiroimidazolidinyl and dispiropyrrolidinyl oxindoles with multiple chiral stereocenters
Source: Royal Society of Chemistry journal article supplement (doi:10.1039/c5ra17215b), 2015-01-01
Supplement: c5ra17215b1.pdf [file c5ra17215b1.pdf]

## Supporting Information

### Acetic Acid Promoted Tandem Cyclization of *in situ* Generated 1,3-Dipoles: Stereoselective Synthesis of Dispiroimidazolidinyl and Dispiropyrrolidinyl Oxindoles with Multiple Chiral Stereocenters

Koorathota Suman and Sathiah Thennarasu\*

*Organic Chemistry Laboratory, CSIR-Central Leather Research Institute*

*Adyar, Chennai-600020, India. Fax: (+) 91-44-24911589*

*E-mail: thennarasu@gmail.com*

### Contents

|                                                          |     |
|----------------------------------------------------------|-----|
| <sup>1</sup> H, <sup>13</sup> C and DEPT-135 NMR spectra | S2  |
| Single crystal XRD data of <b>3a</b> and <b>5a</b>       | S61 |

## 2. NMR and Mass Spectra of compounds

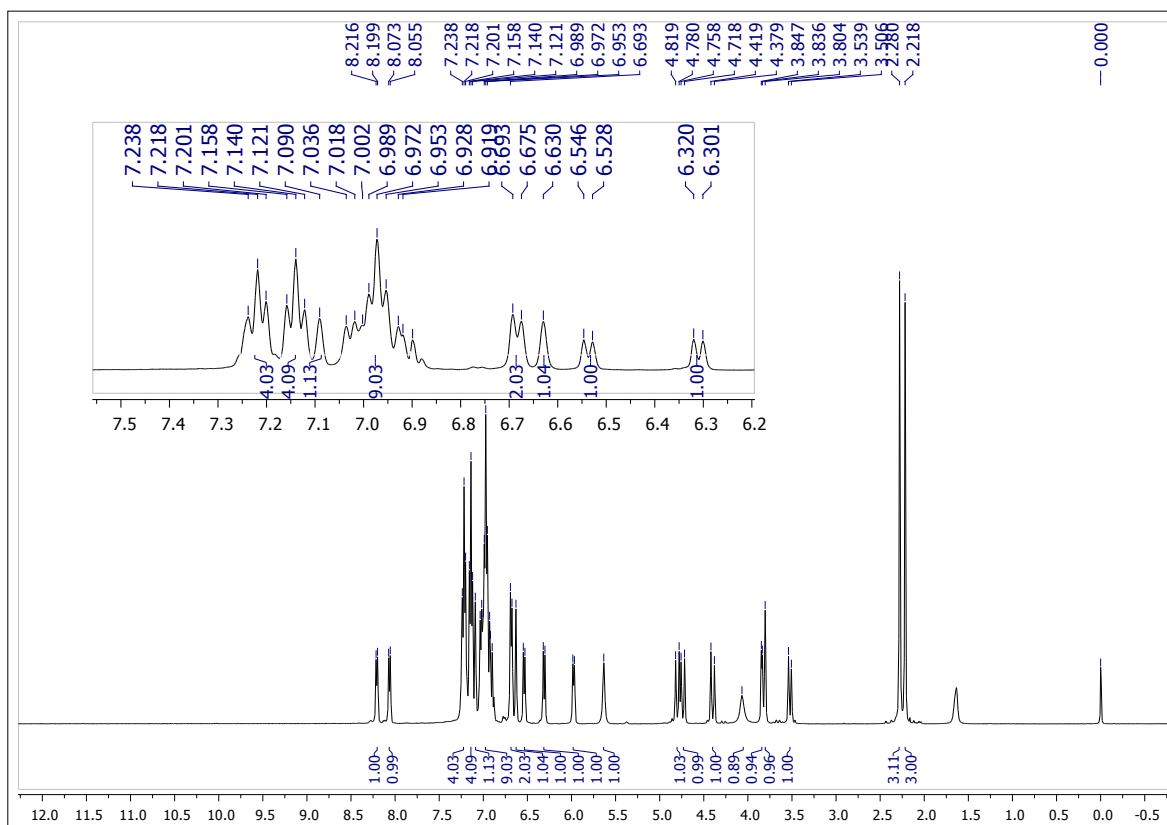

Figure 1. <sup>1</sup>H NMR spectrum of compound 3a

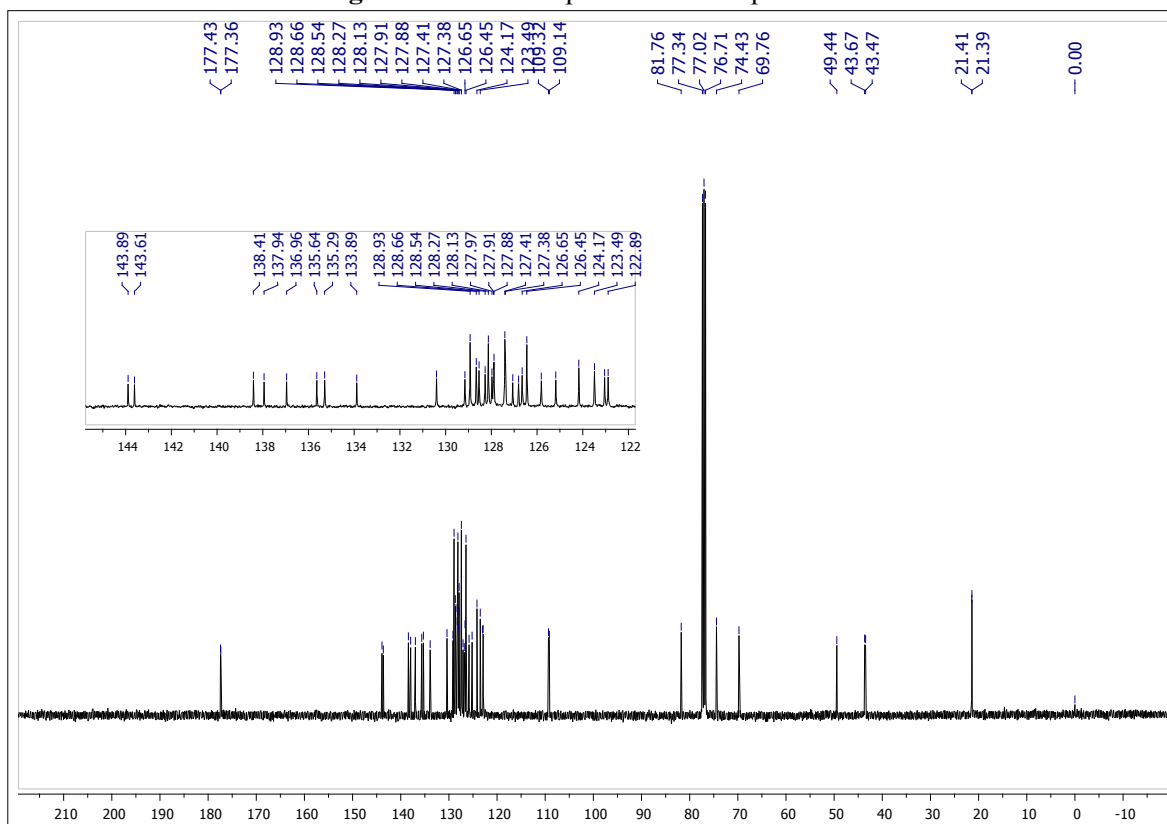

Figure 2. <sup>13</sup>C NMR spectrum of compound 3a

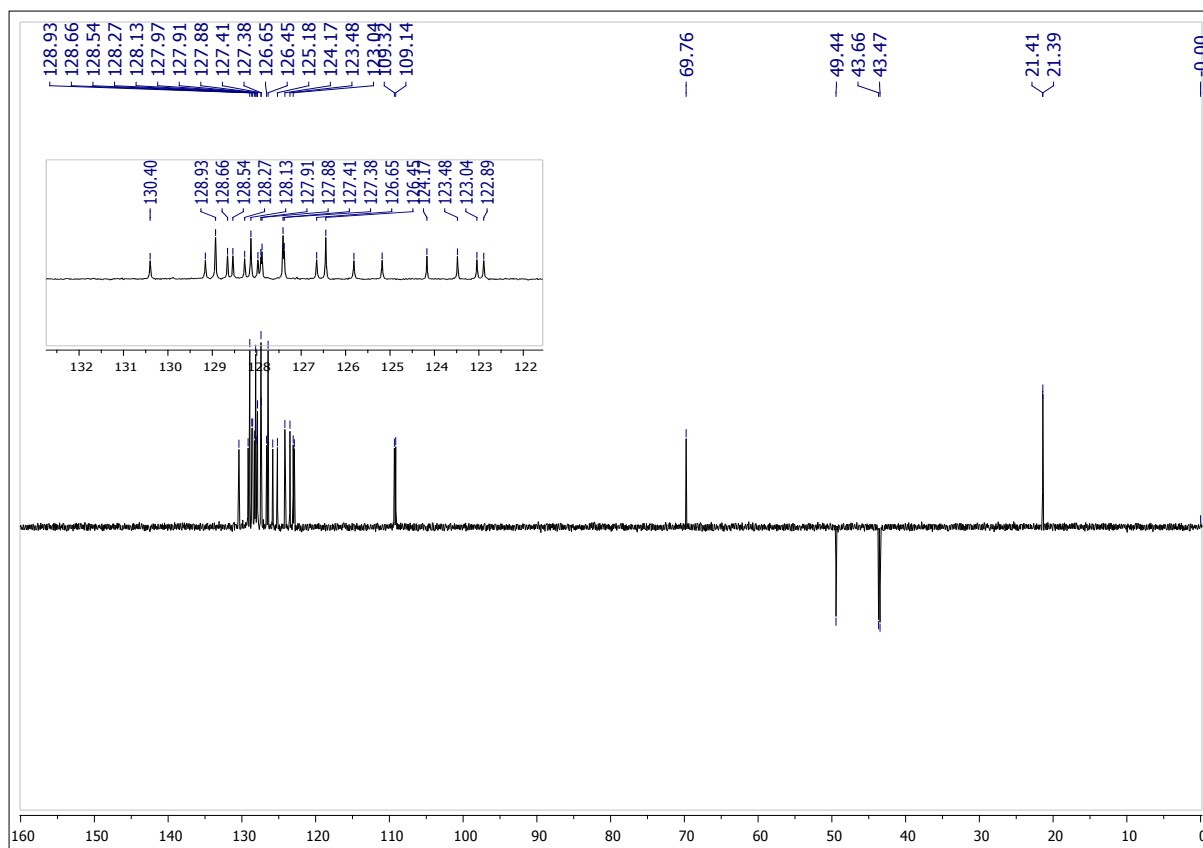

Figure 3. DEPT-135 spectrum of compound 3a

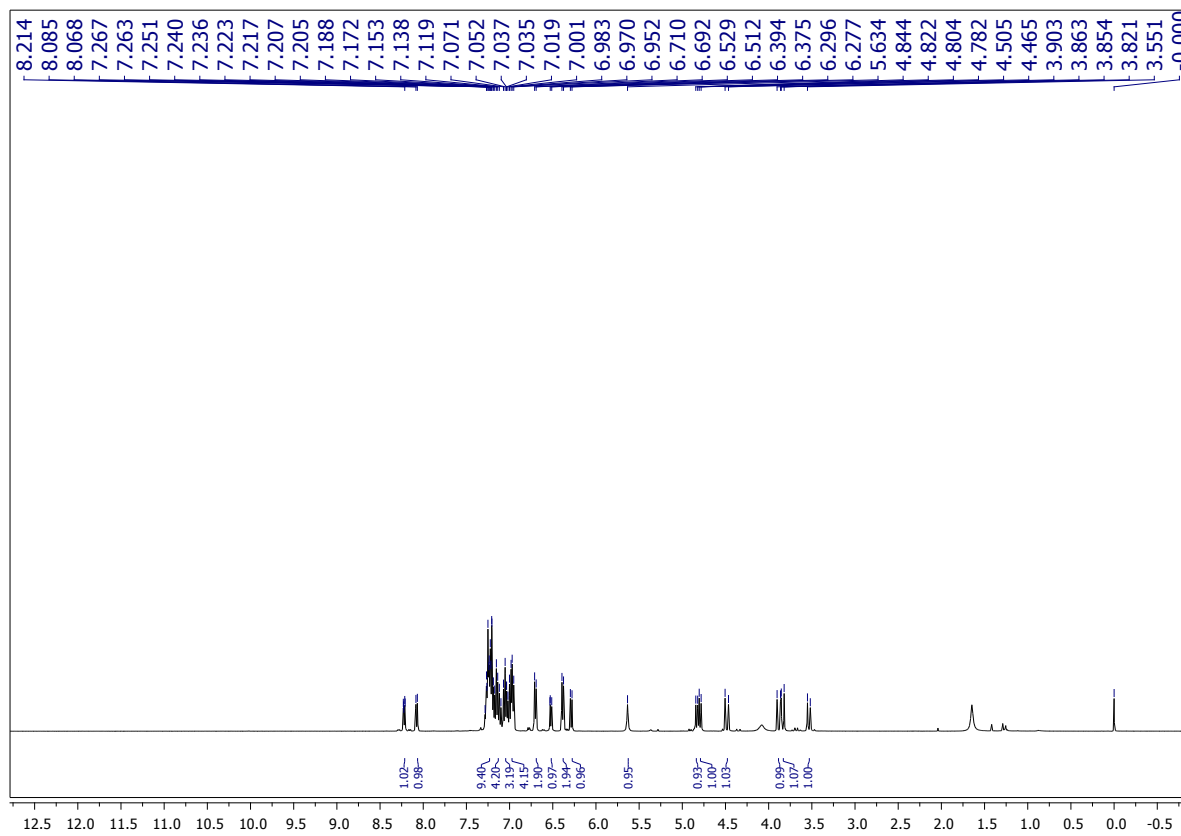

Figure 4. <sup>1</sup>H NMR spectrum of compound 3b

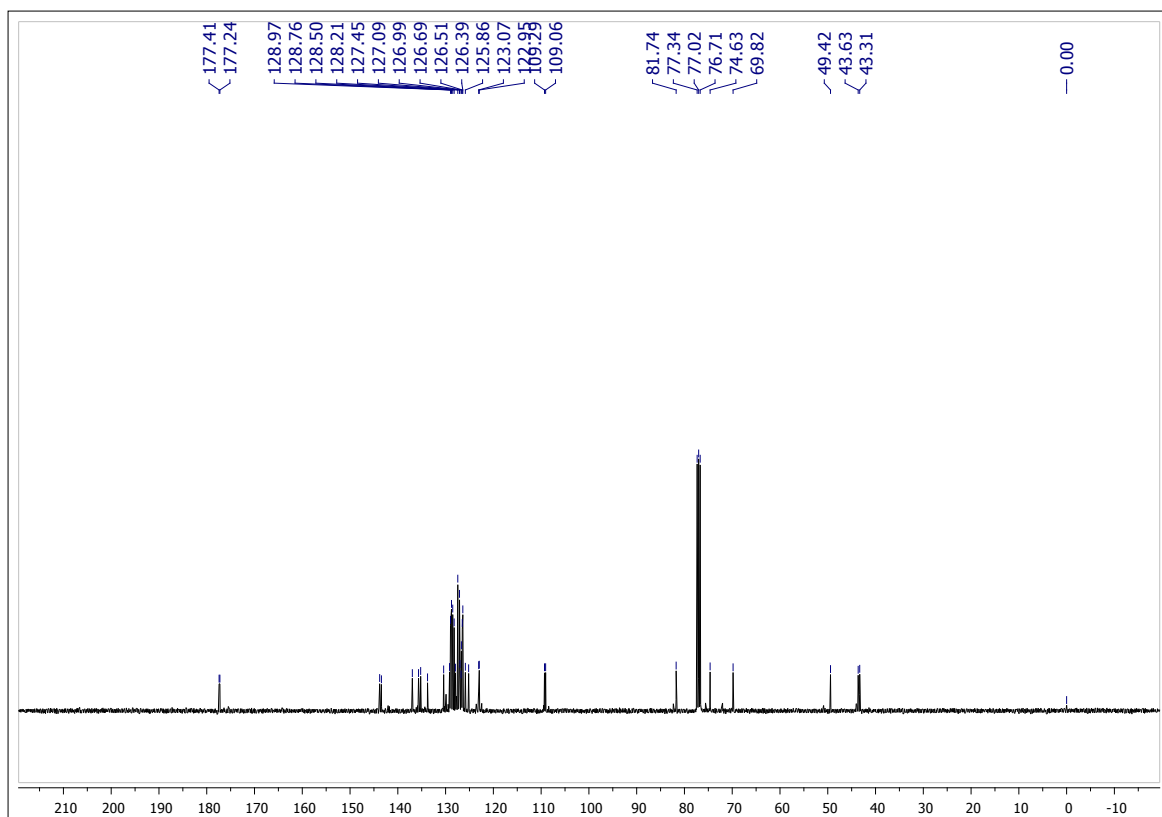

Figure 5.  $^{13}\text{C}$  NMR spectrum of compound **3b**

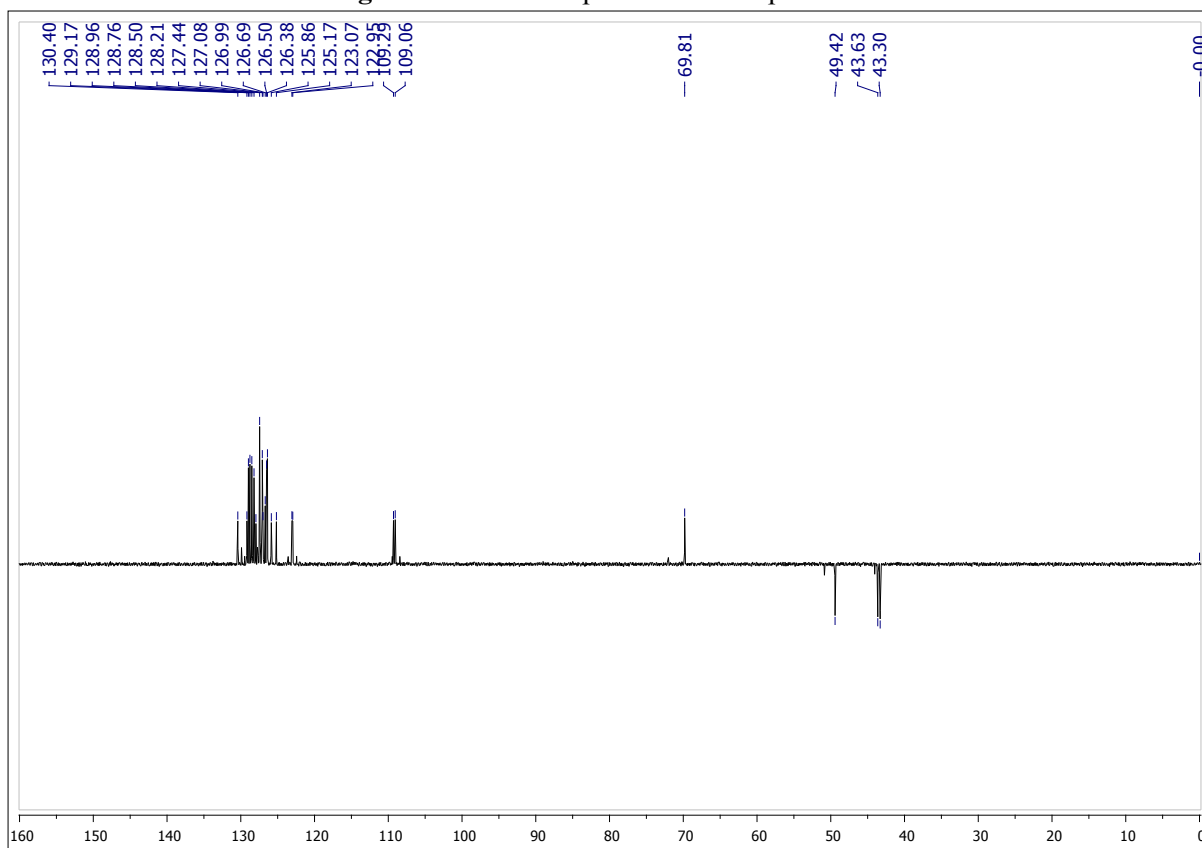

Figure 6. DEPT-135 spectrum of compound **3b**

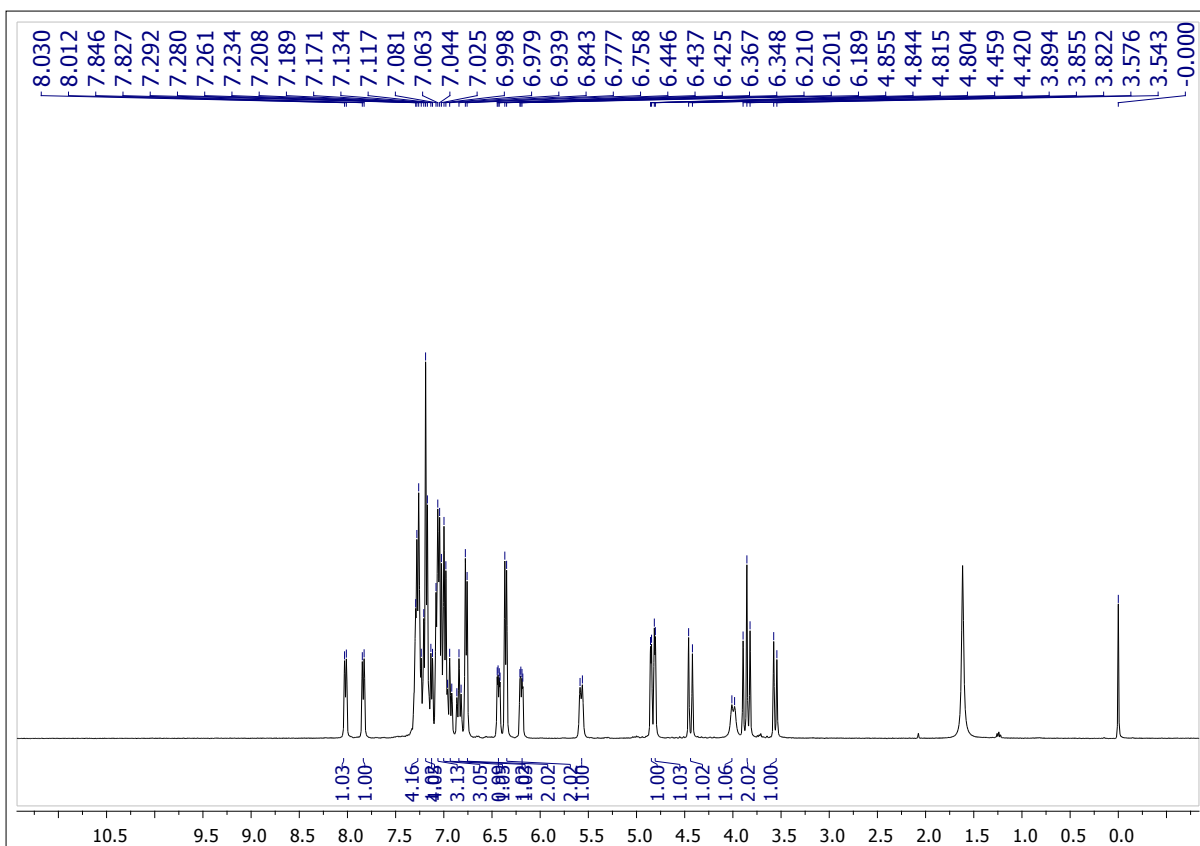

**Figure 7. <sup>1</sup>H NMR spectrum of compound 3c**

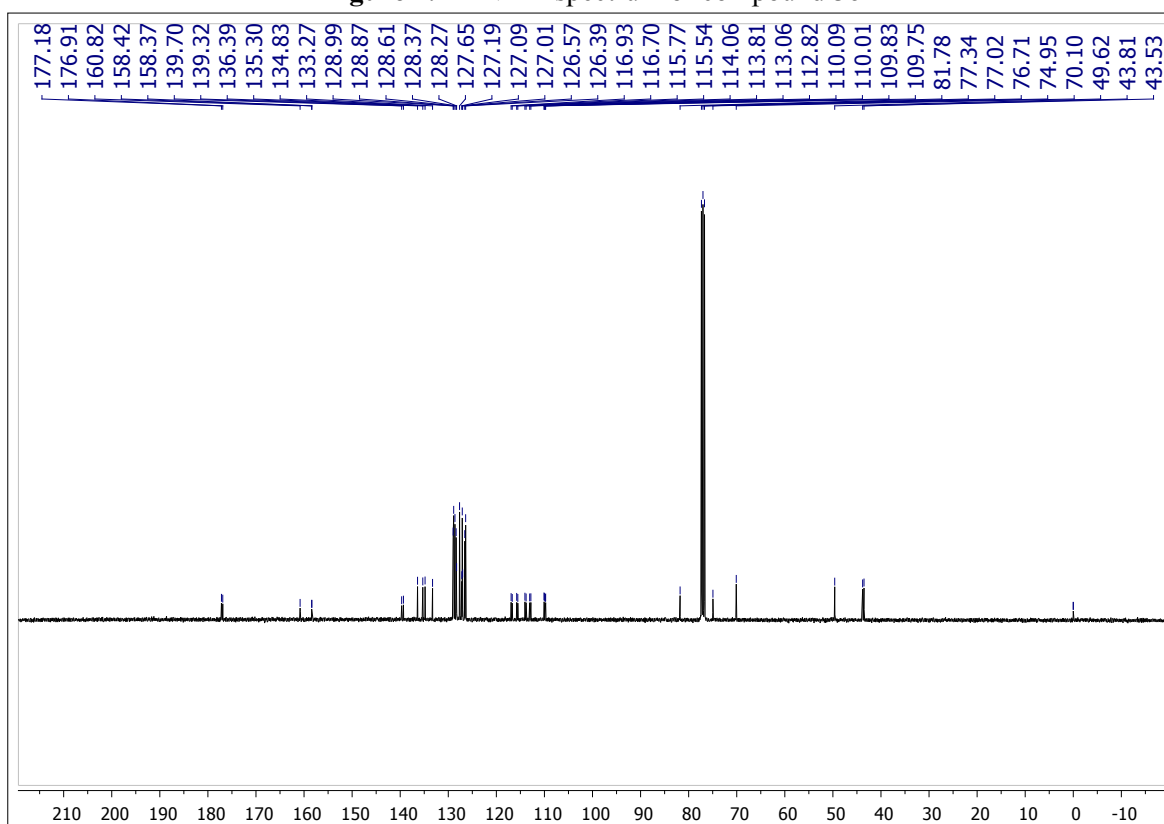

**Figure 8. <sup>13</sup>C NMR spectrum of compound 3c**

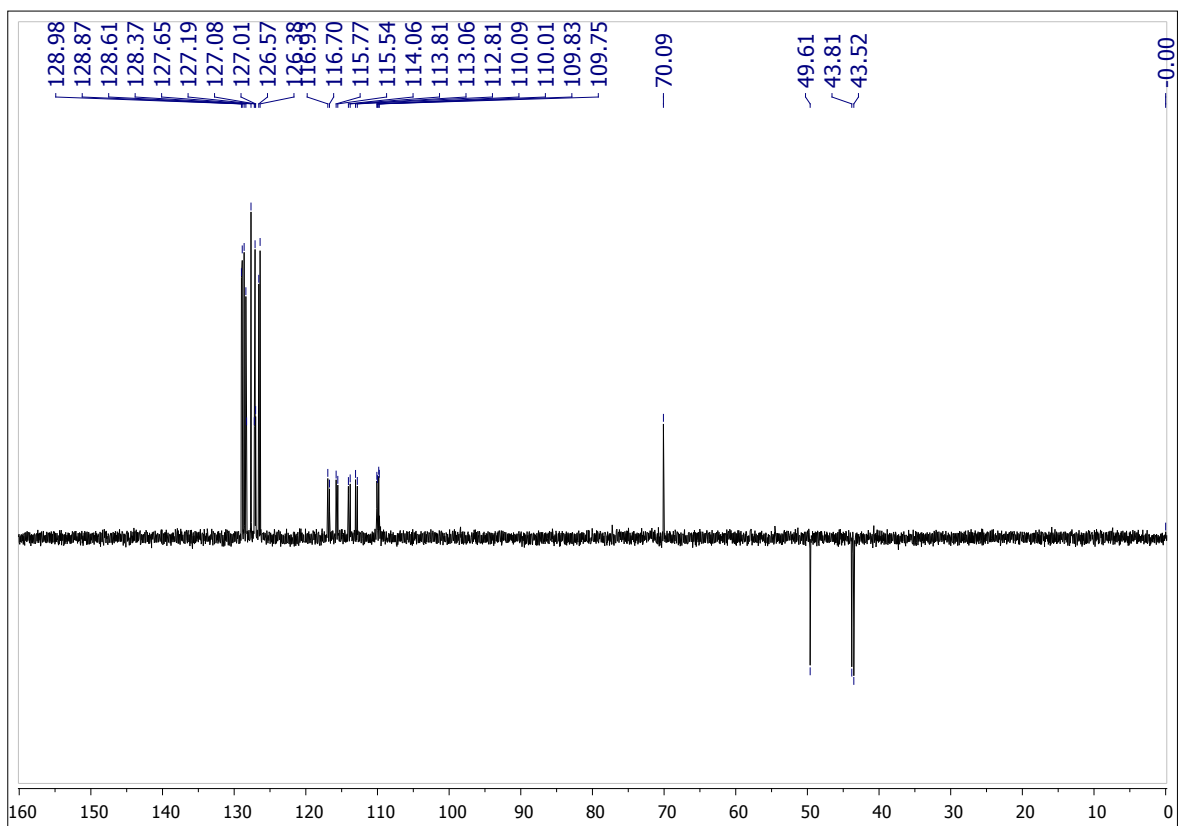

Figure 9. DEPT-135 spectrum of compound 3c

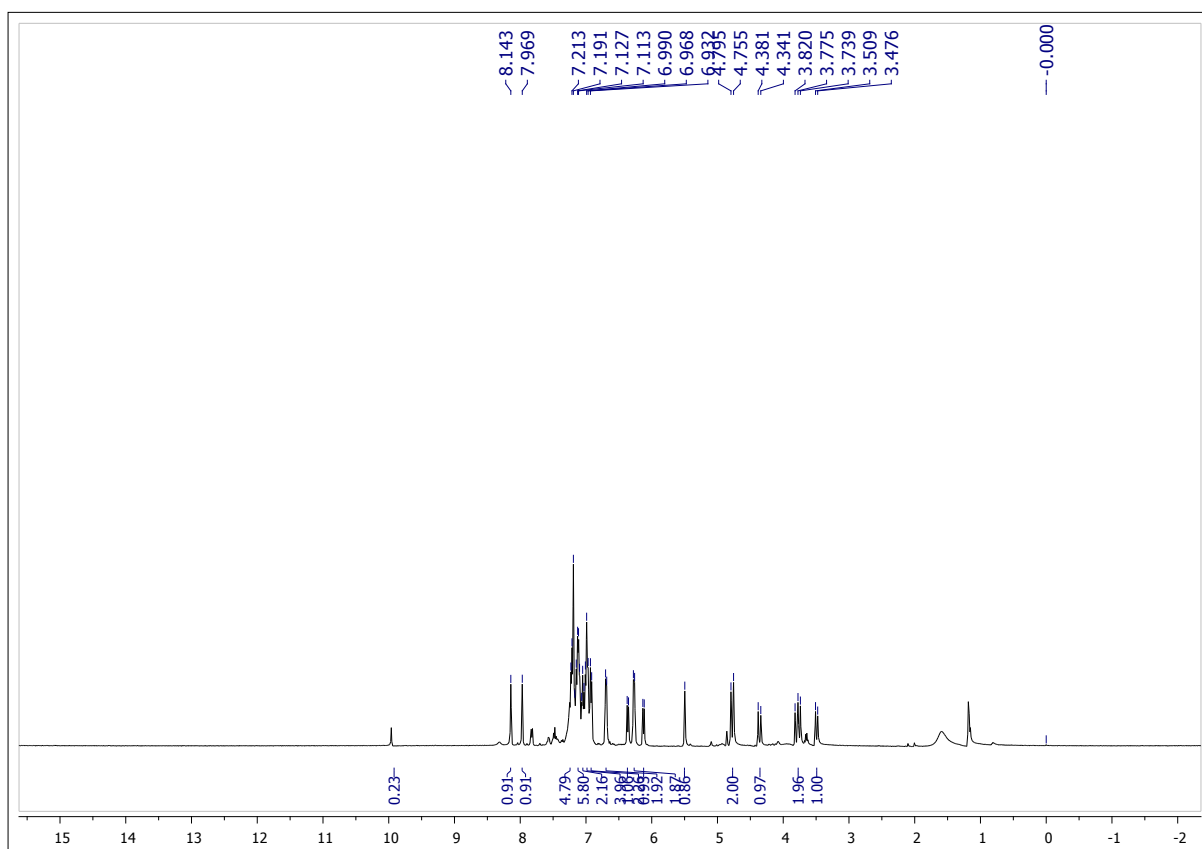

Figure 10. <sup>1</sup>H NMR spectrum of compound 3d

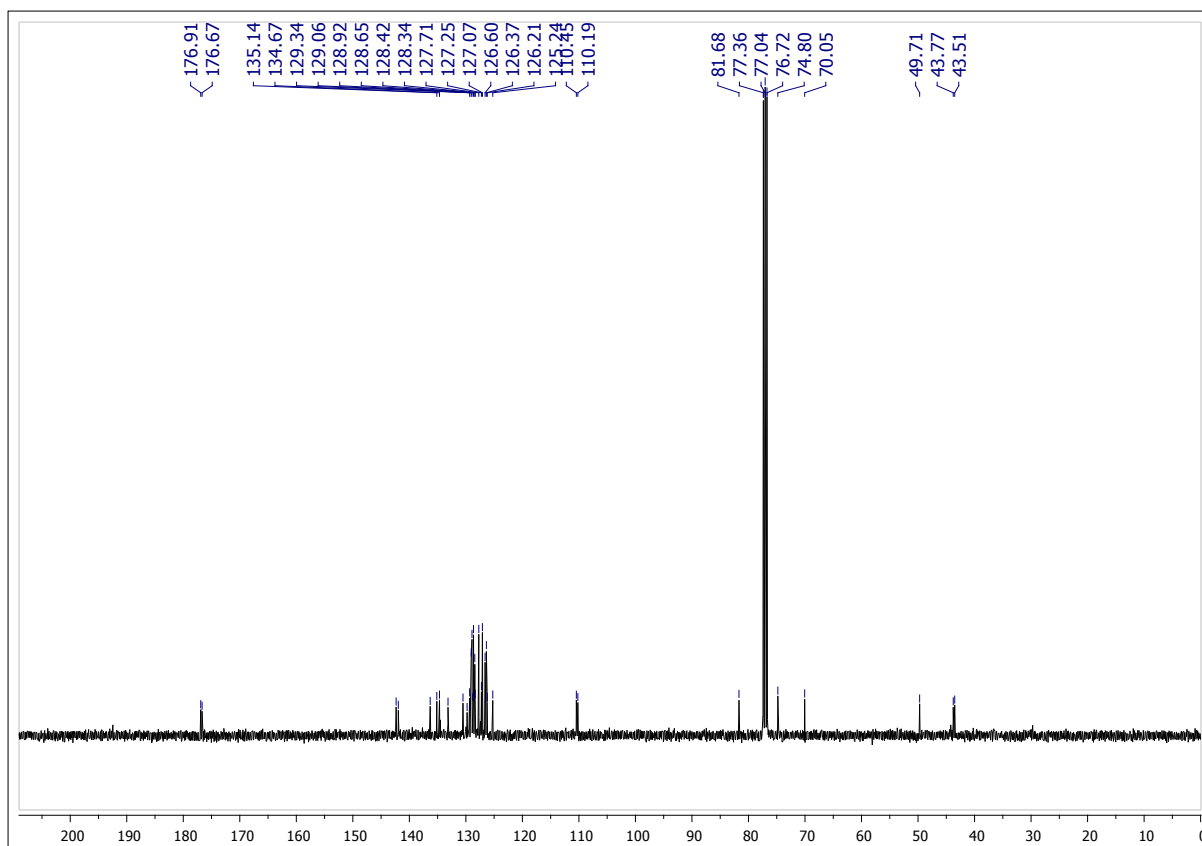

Figure 11.  $^{13}\text{C}$  NMR spectrum of compound **3d**

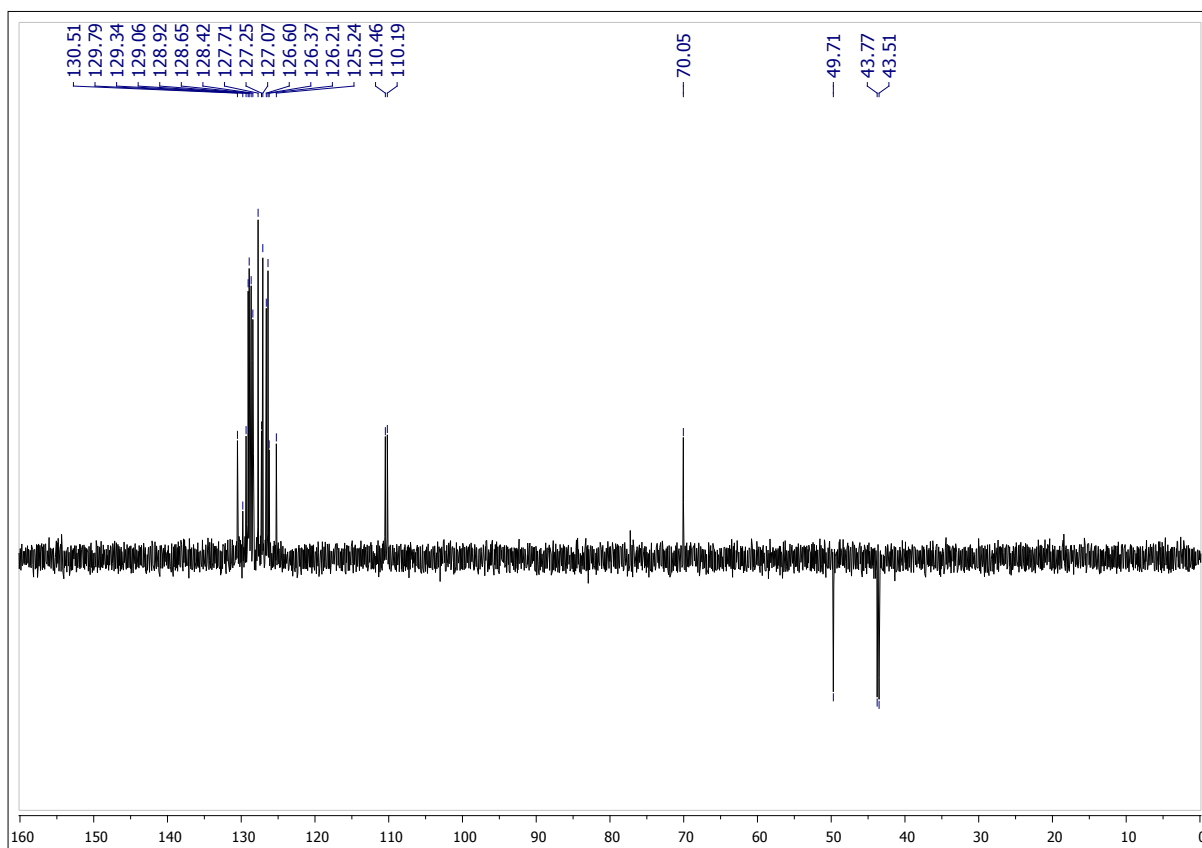

Figure 12. DEPT-135 spectrum of compound **3d**

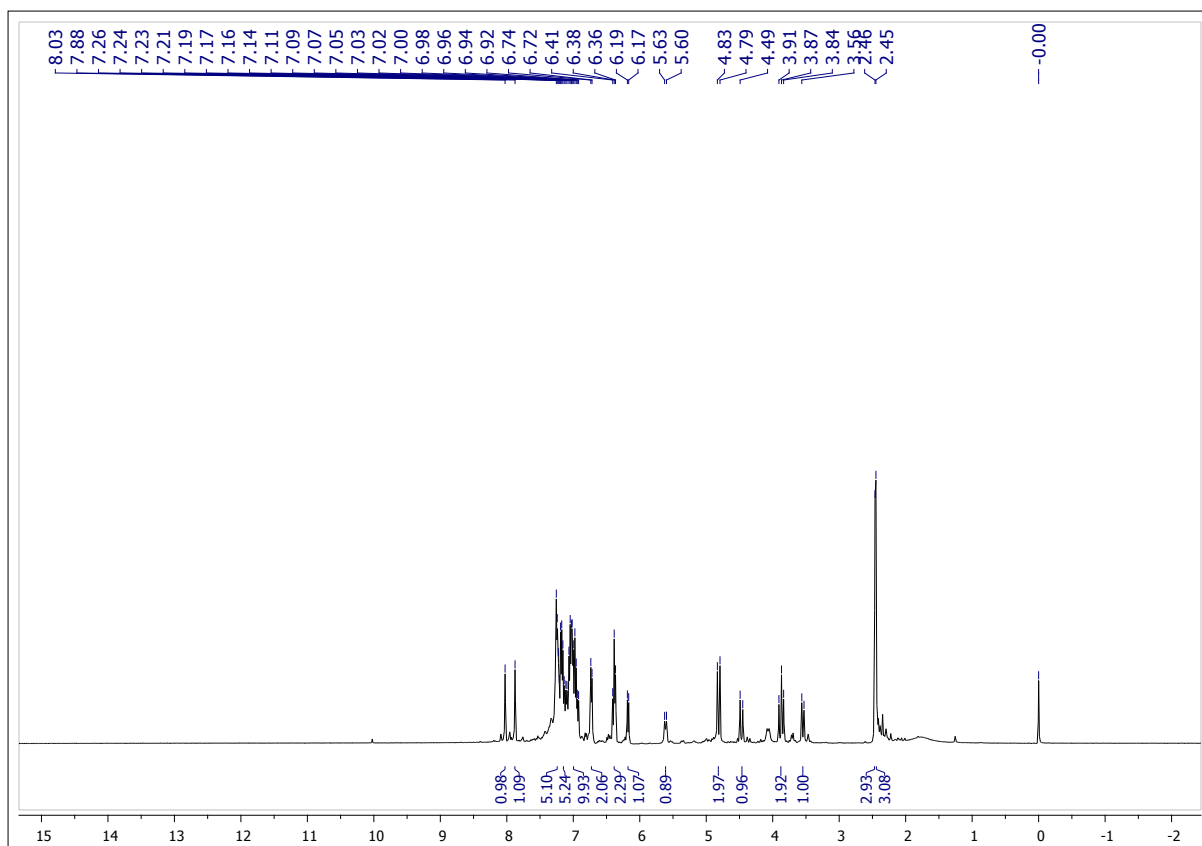

Figure 13.  $^1\text{H}$  NMR spectrum of compound **3e**

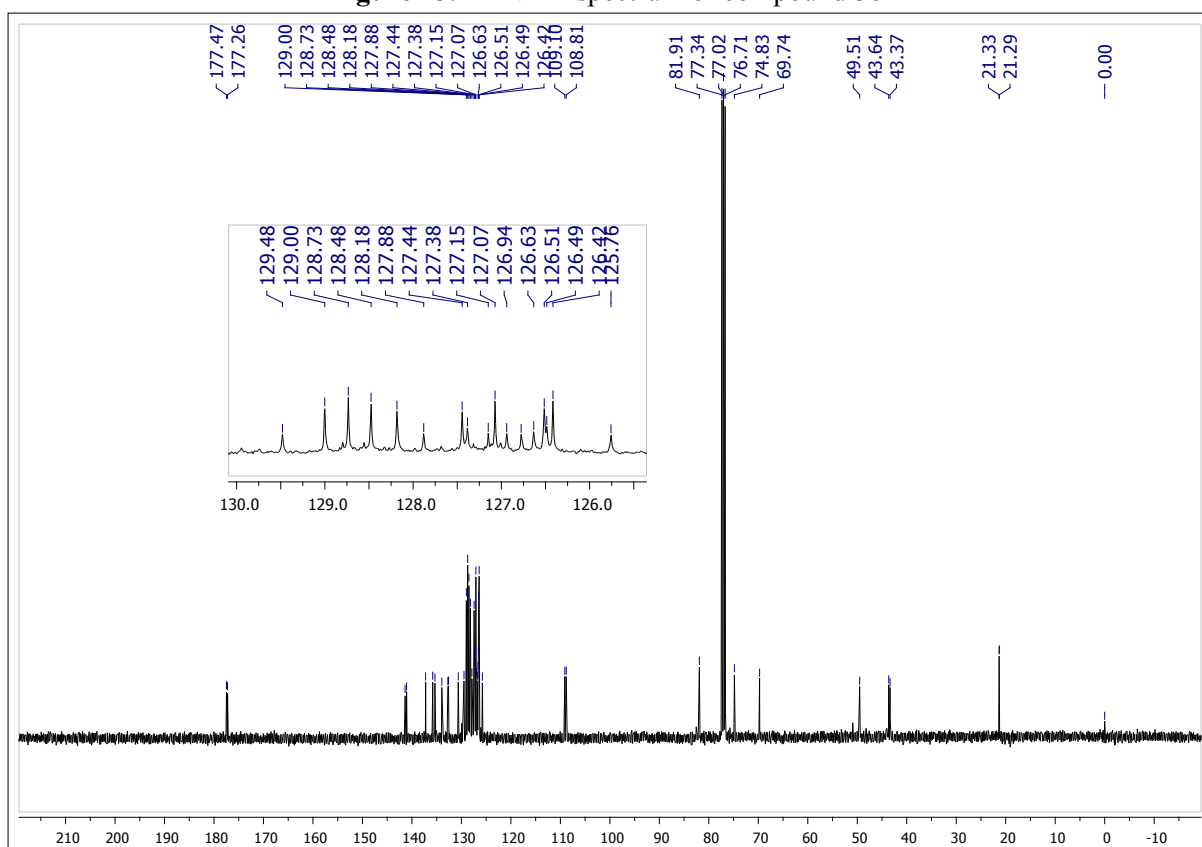

Figure 14.  $^{13}\text{C}$  NMR spectrum of compound **3e**



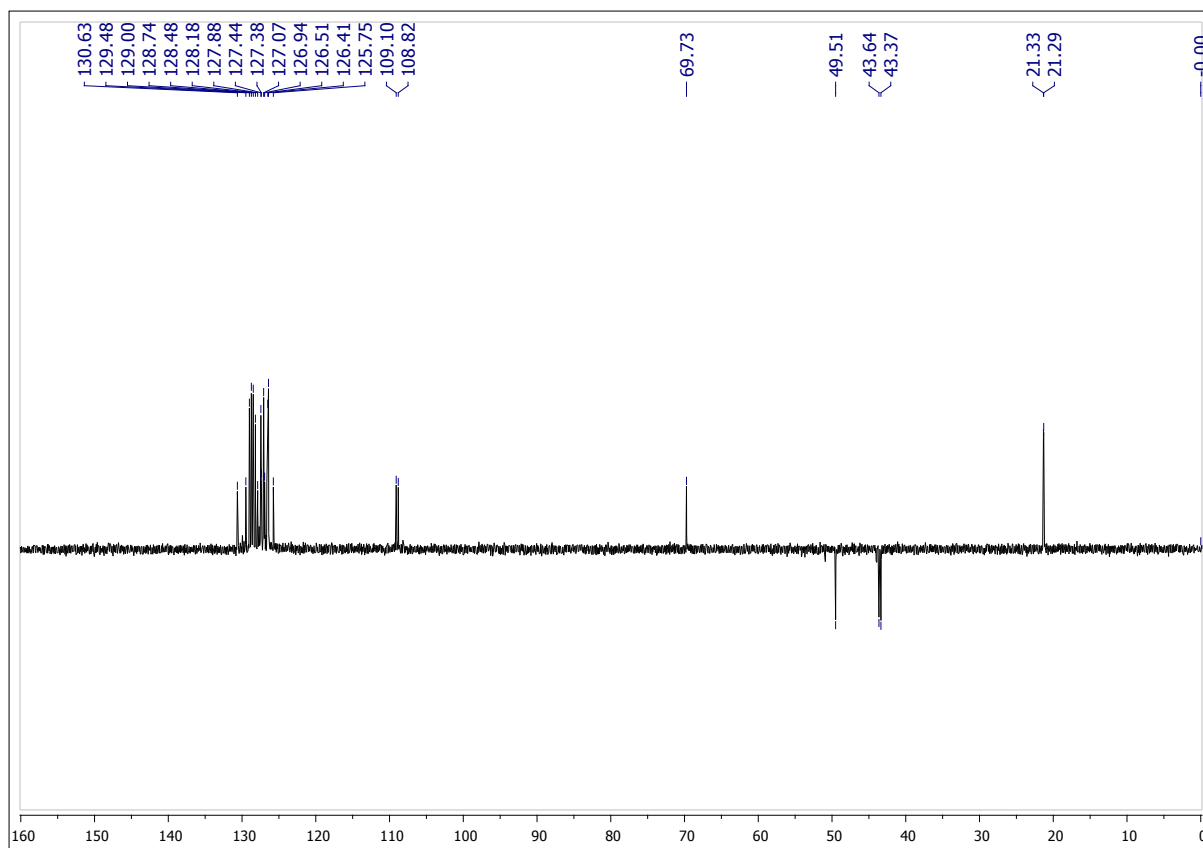

Figure 15. DEPT-135 spectrum of compound 3e

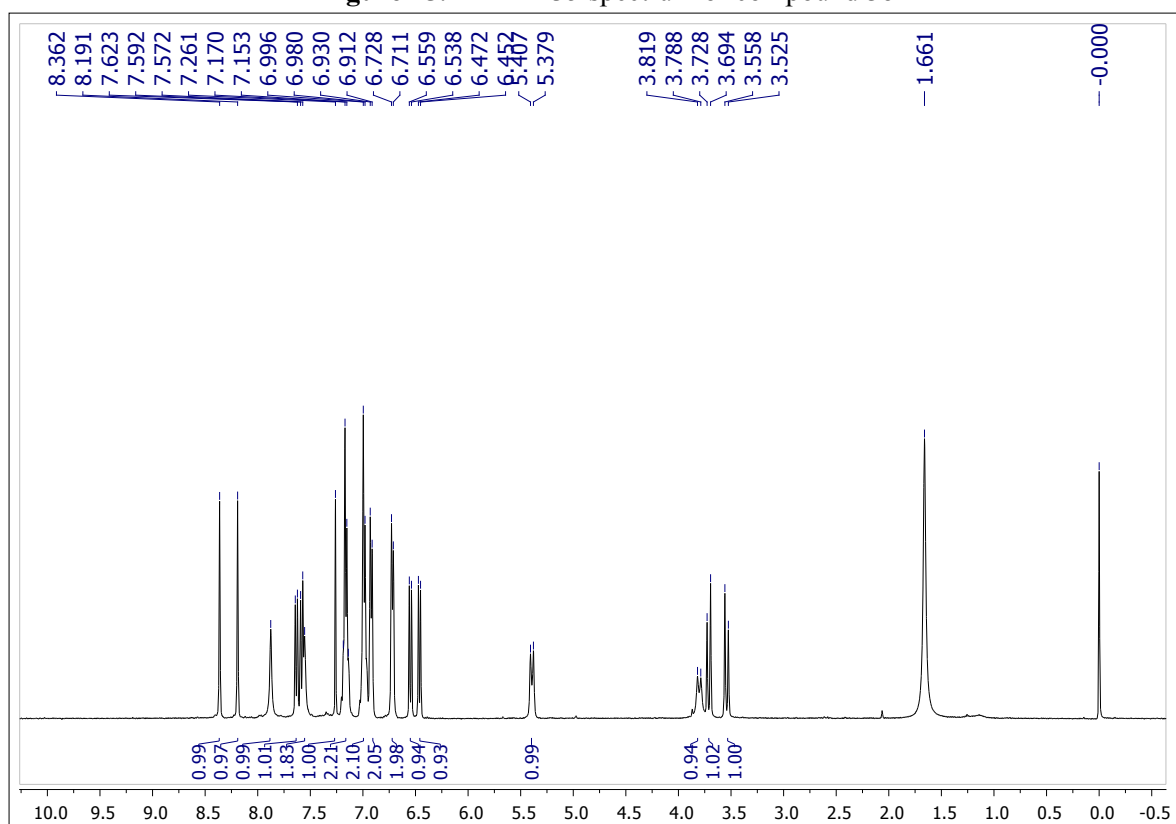

Figure 16:  $^1\text{H}$  NMR spectrum of compound 3f

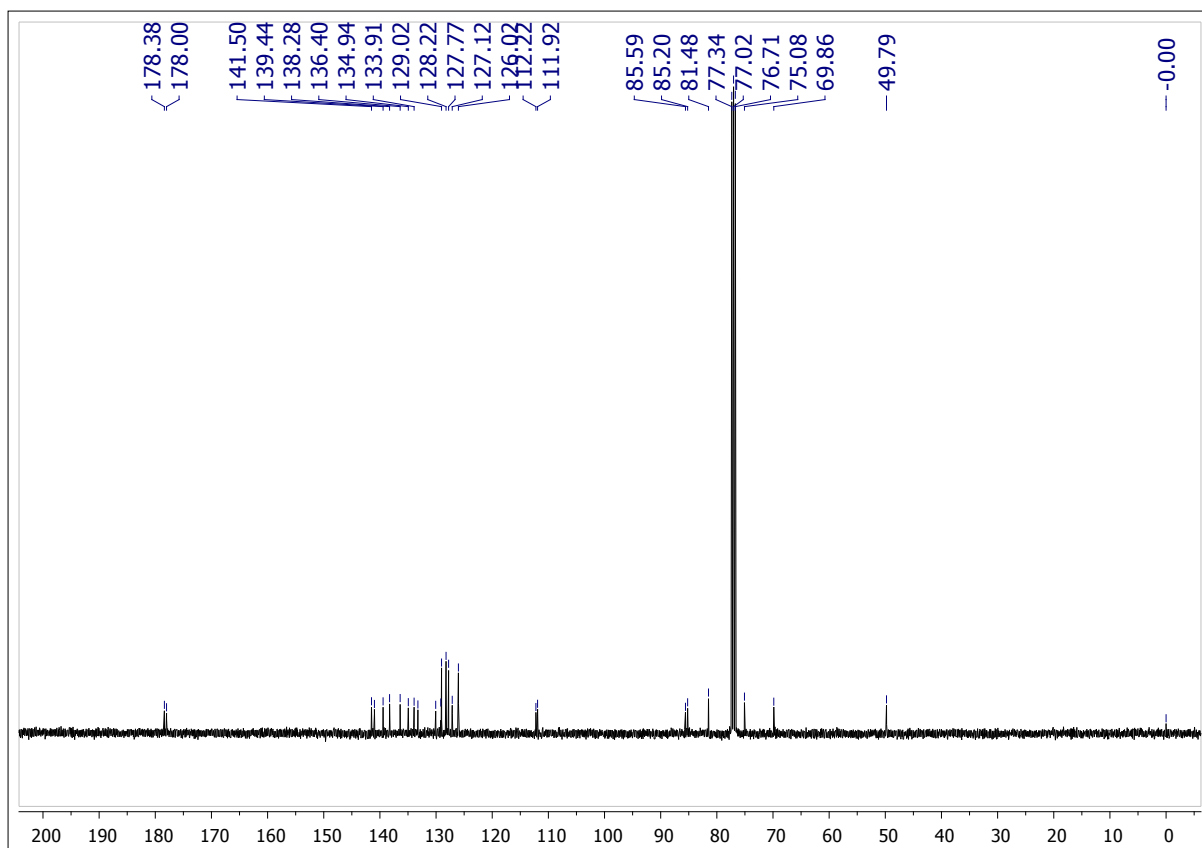

Figure 17.  $^{13}\text{C}$  NMR spectrum of compound **3f**

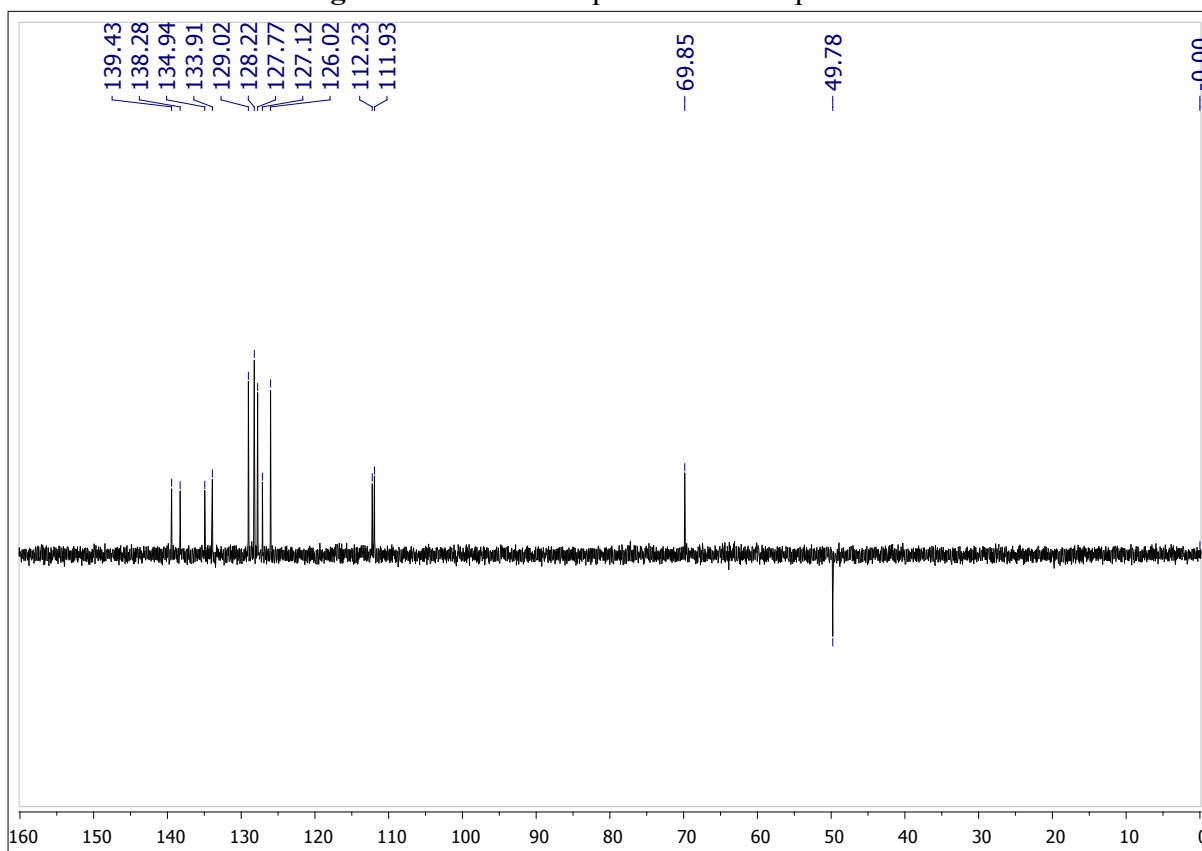

Figure 18. DEPT-135 spectrum of compound **3f**

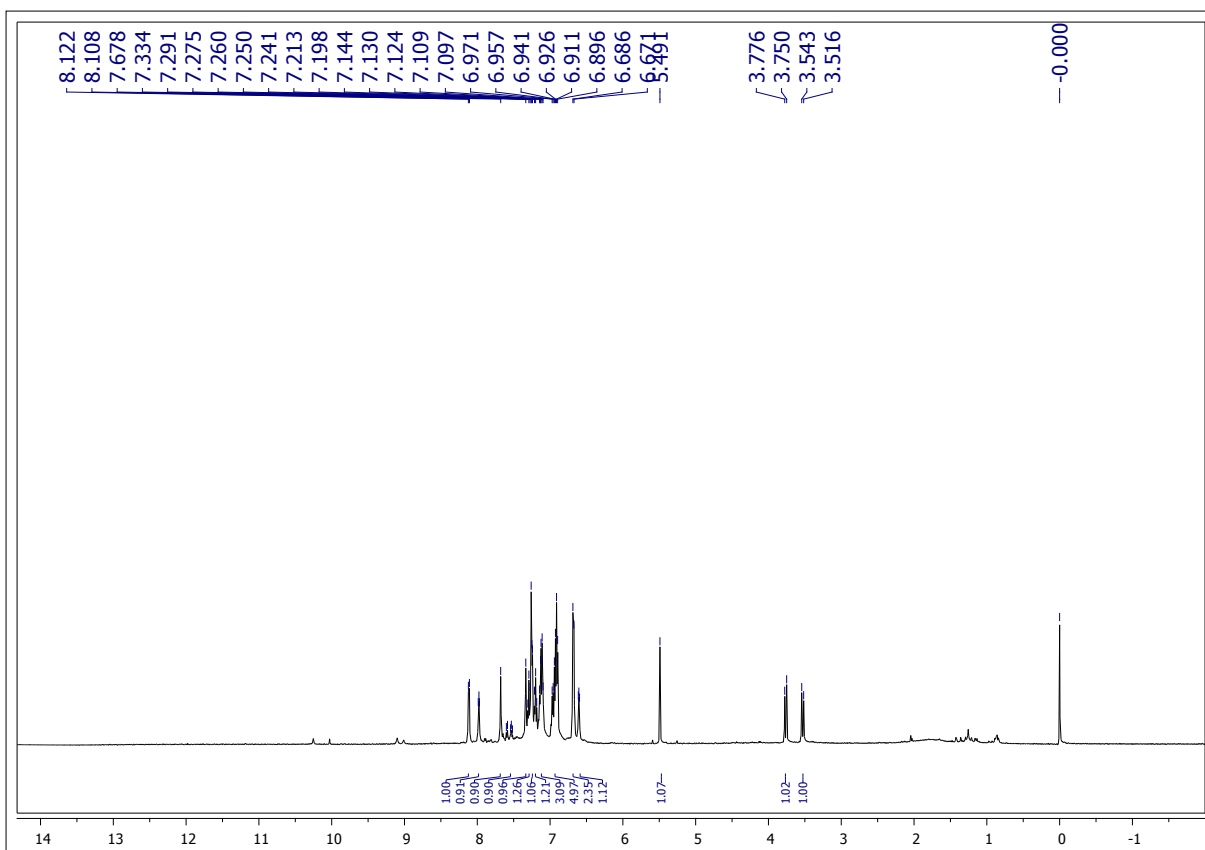

Figure 19.  $^1\text{H}$  NMR spectrum of compound **3g**

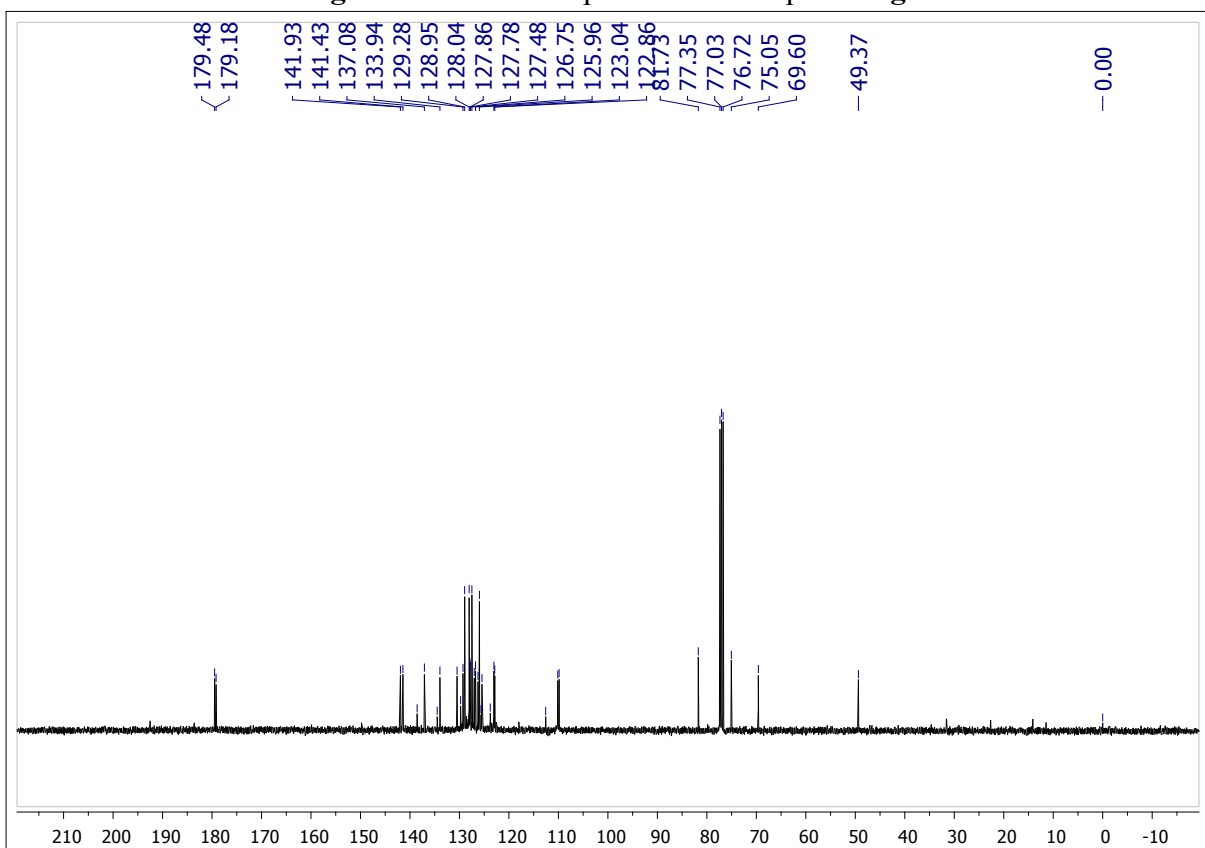

Figure 20.  $^{13}\text{C}$  NMR spectrum of compound **3g**

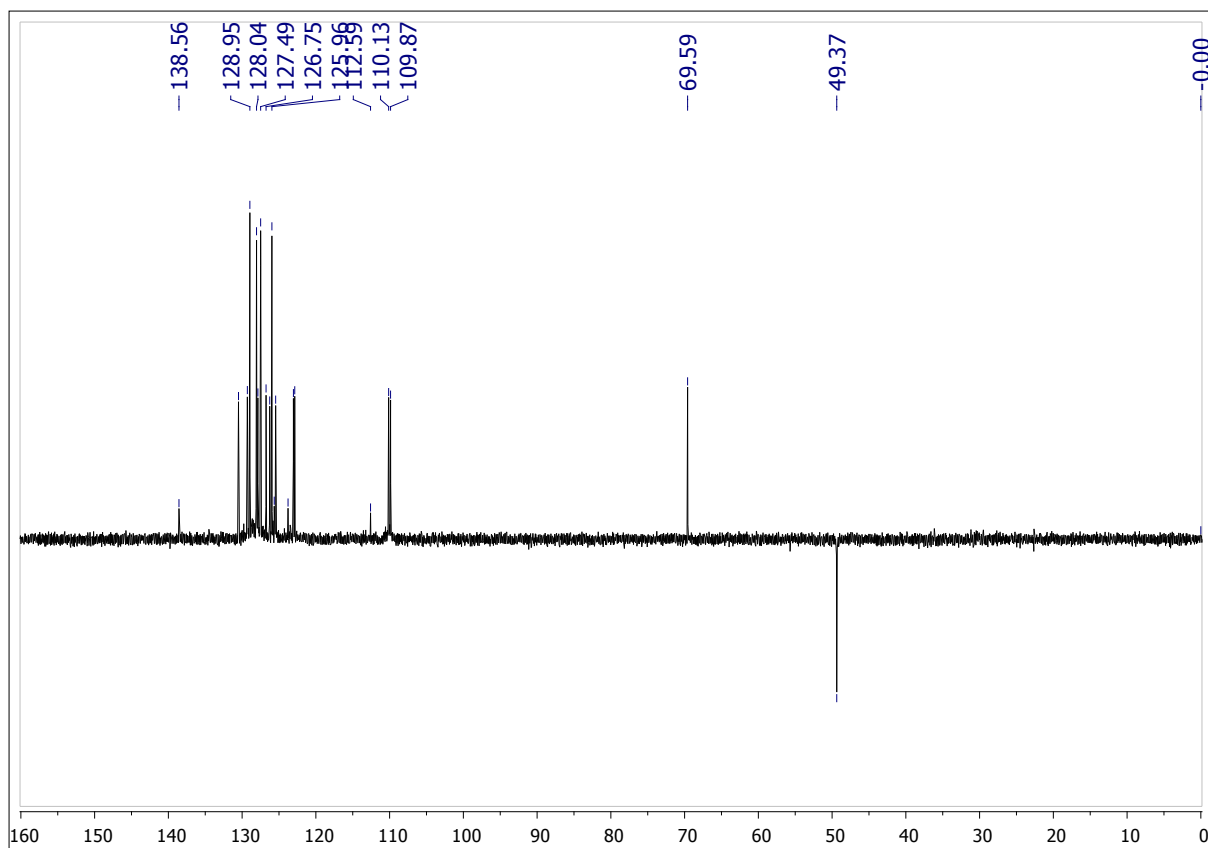

Figure 21. DEPT-135 spectrum of compound 3g

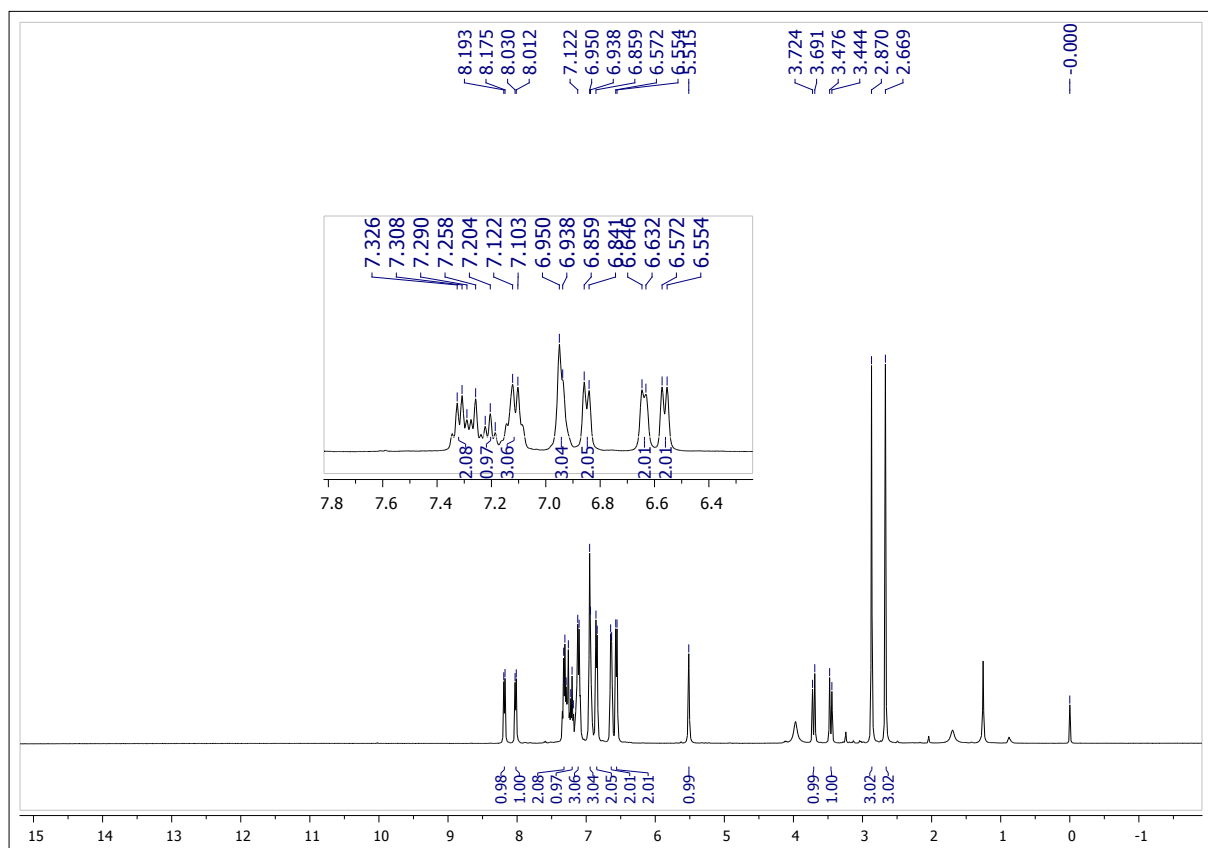

Figure 22. <sup>1</sup>H NMR spectrum of compound 3h

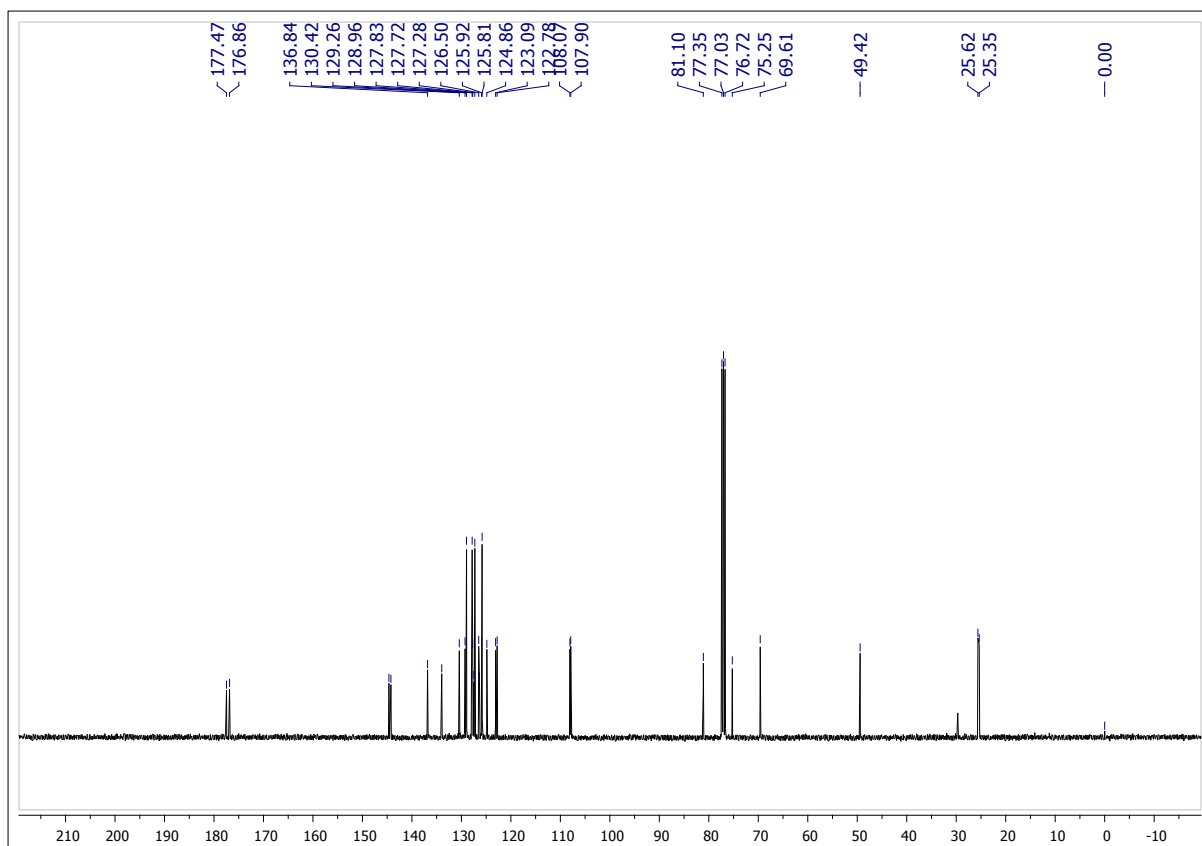

Figure 23.  $^{13}\text{C}$  NMR spectrum of compound **3h**

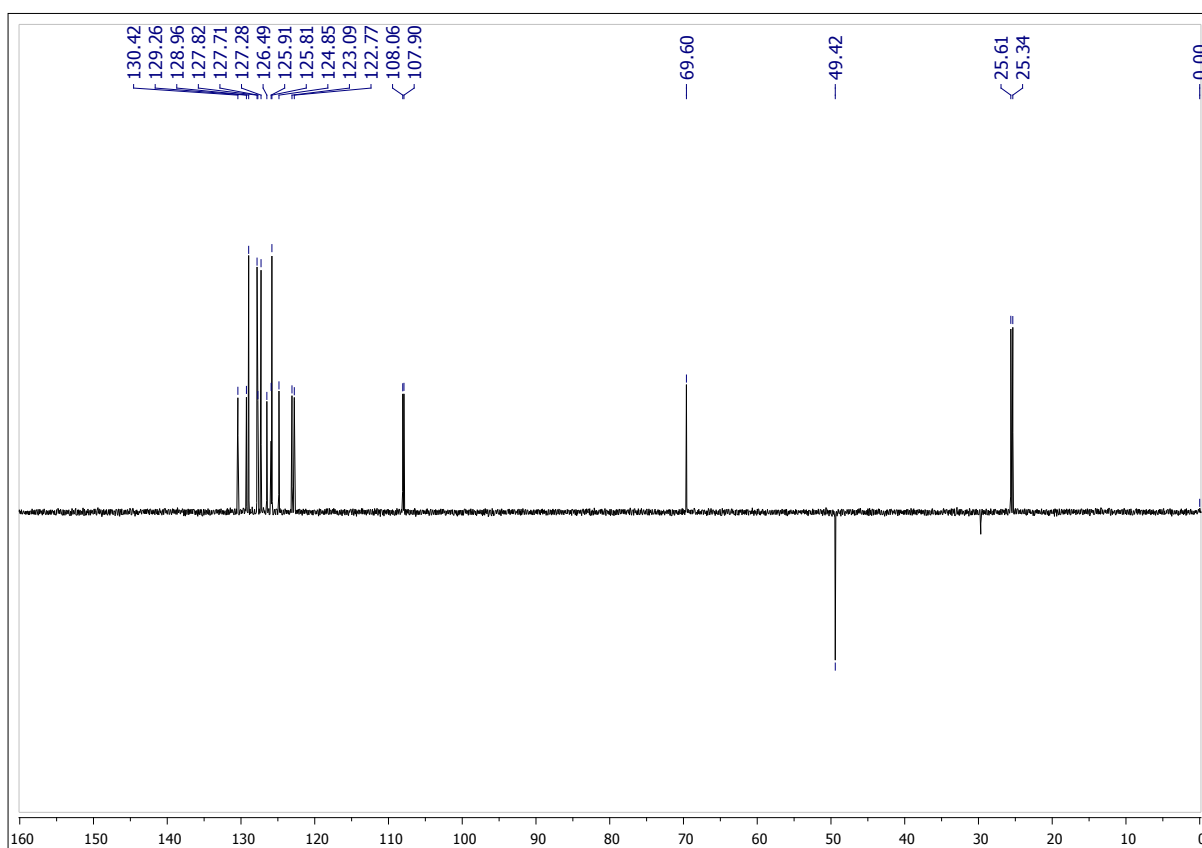

Figure 24. DEPT-135 spectrum of compound **3h**

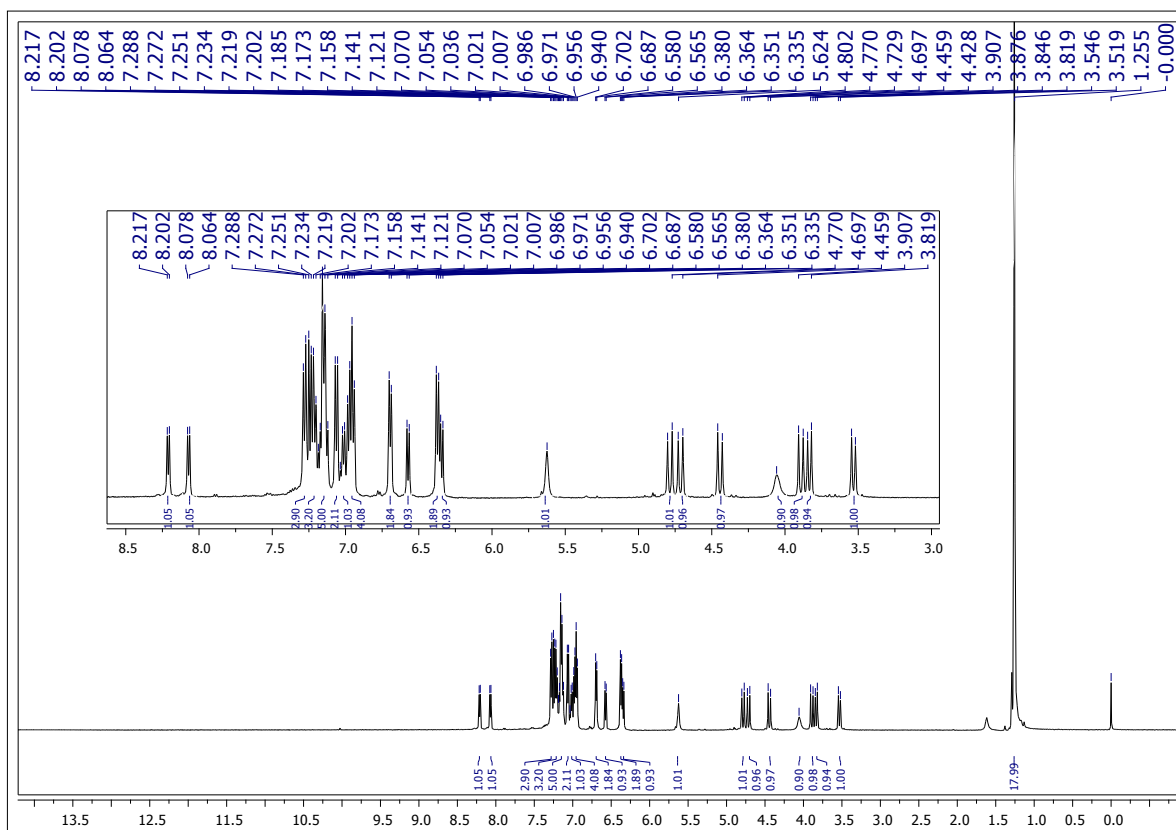

Figure 25.  $^1\text{H}$  NMR spectrum of compound **3i**

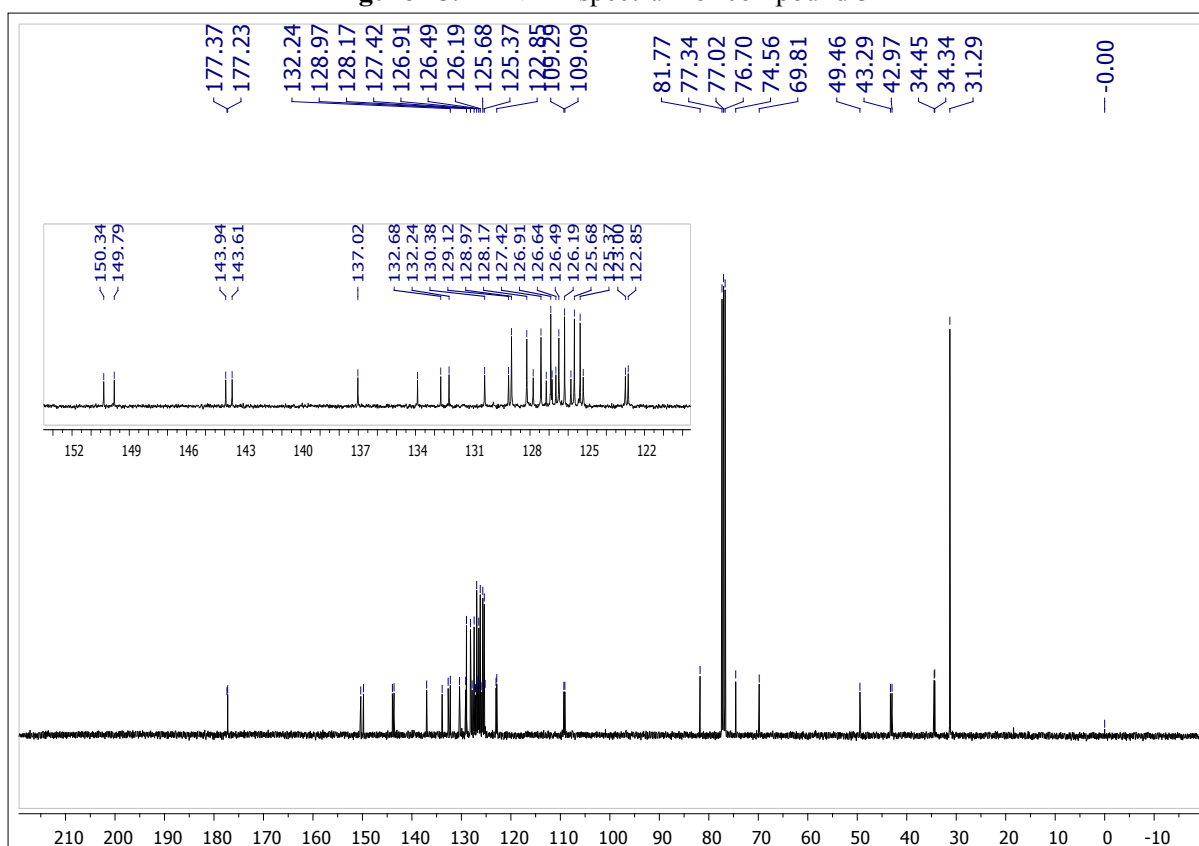

Figure 26.  $^{13}\text{C}$  NMR spectrum of compound **3i**

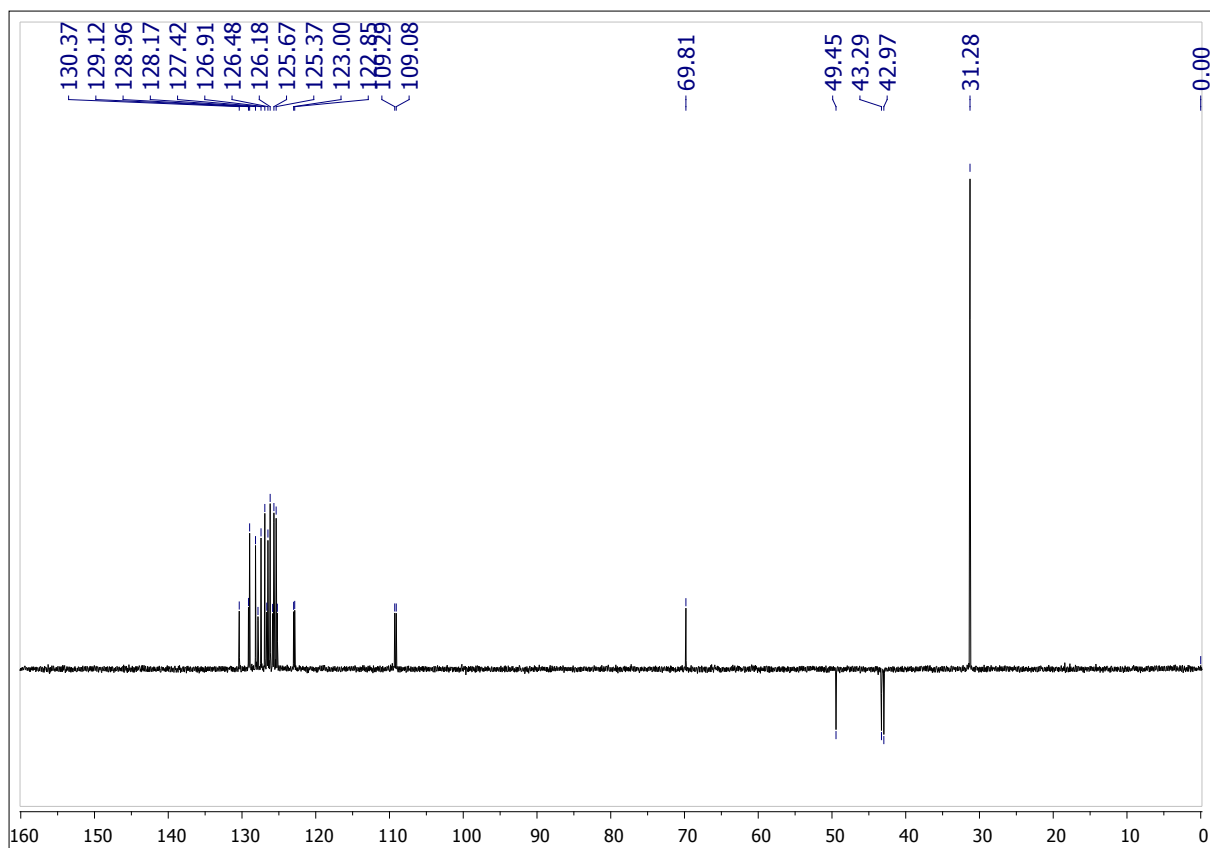

Figure 27. DEPT-135 spectrum of compound **3i**

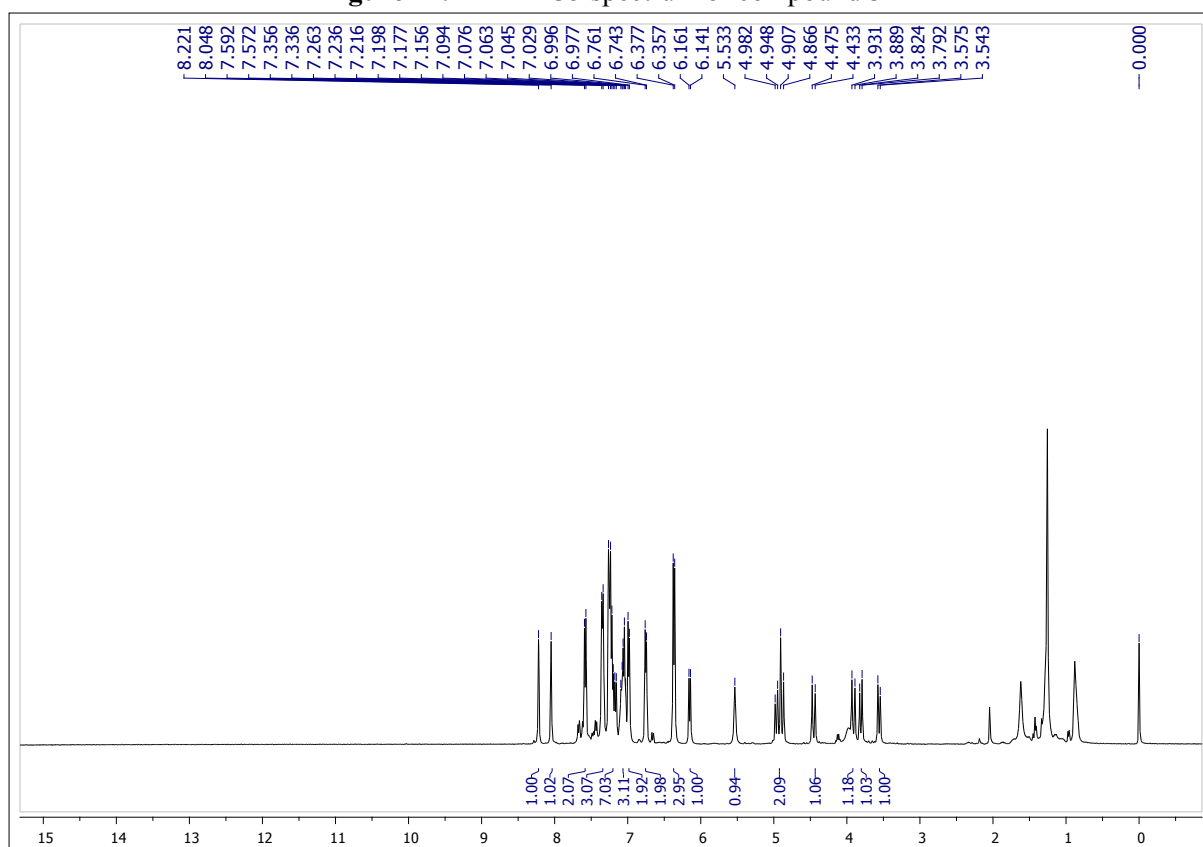

Figure 28. <sup>1</sup>H NMR spectrum of compound **3j**

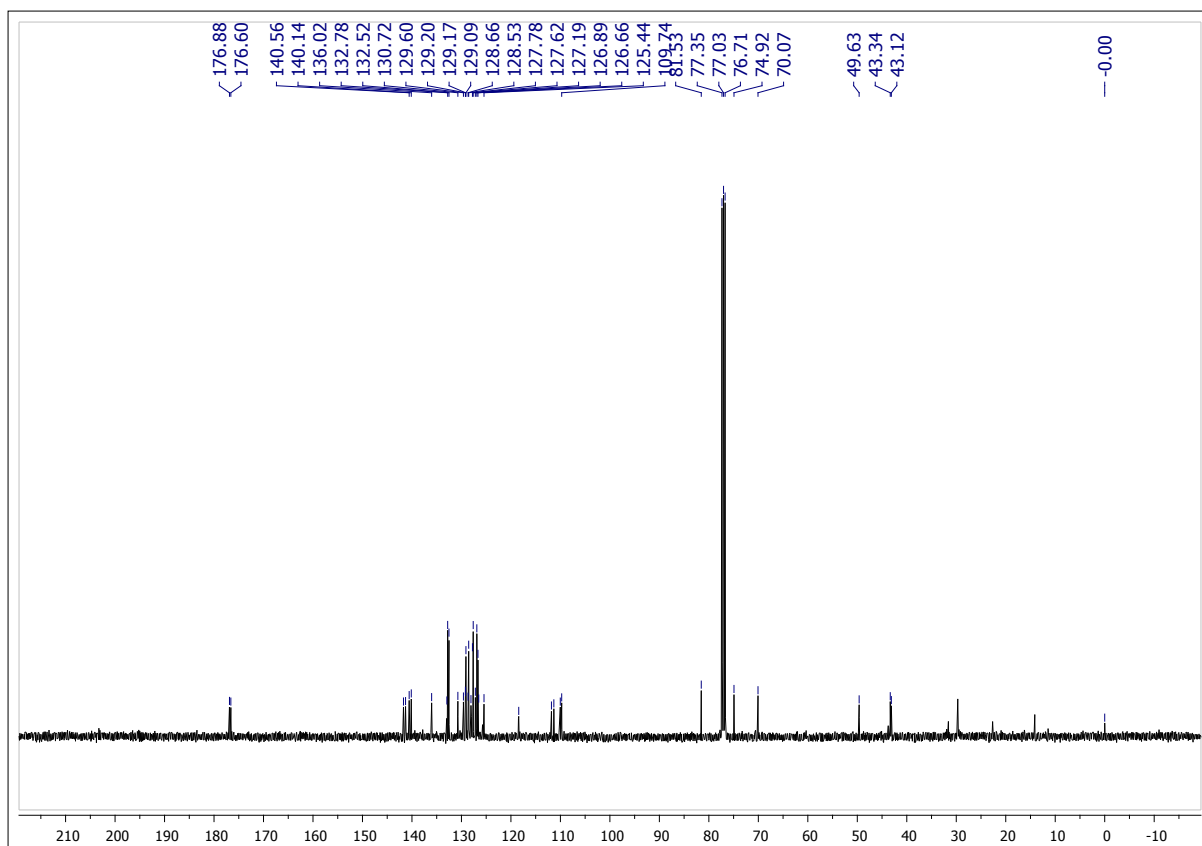

Figure 29.  $^{13}\text{C}$  NMR spectrum of compound **3j**

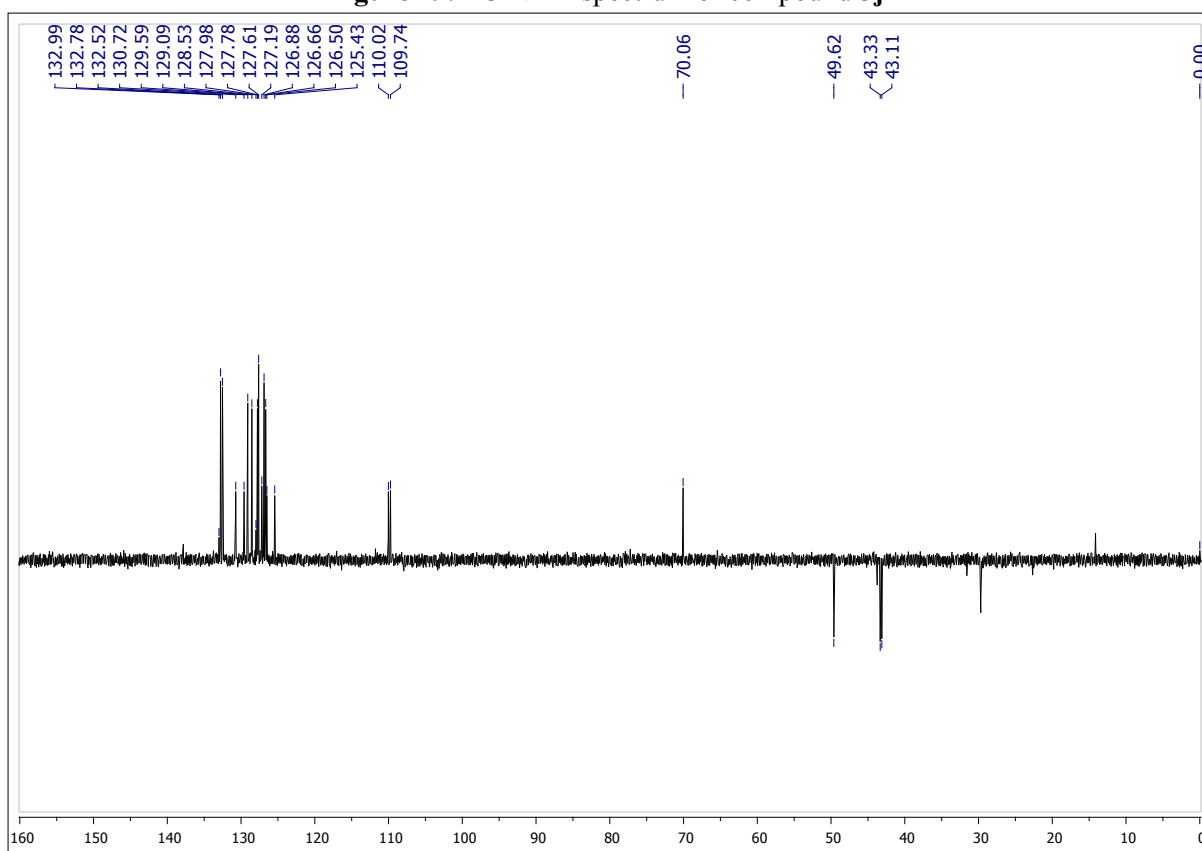

Figure 30. DEPT-135 spectrum of compound **3j**



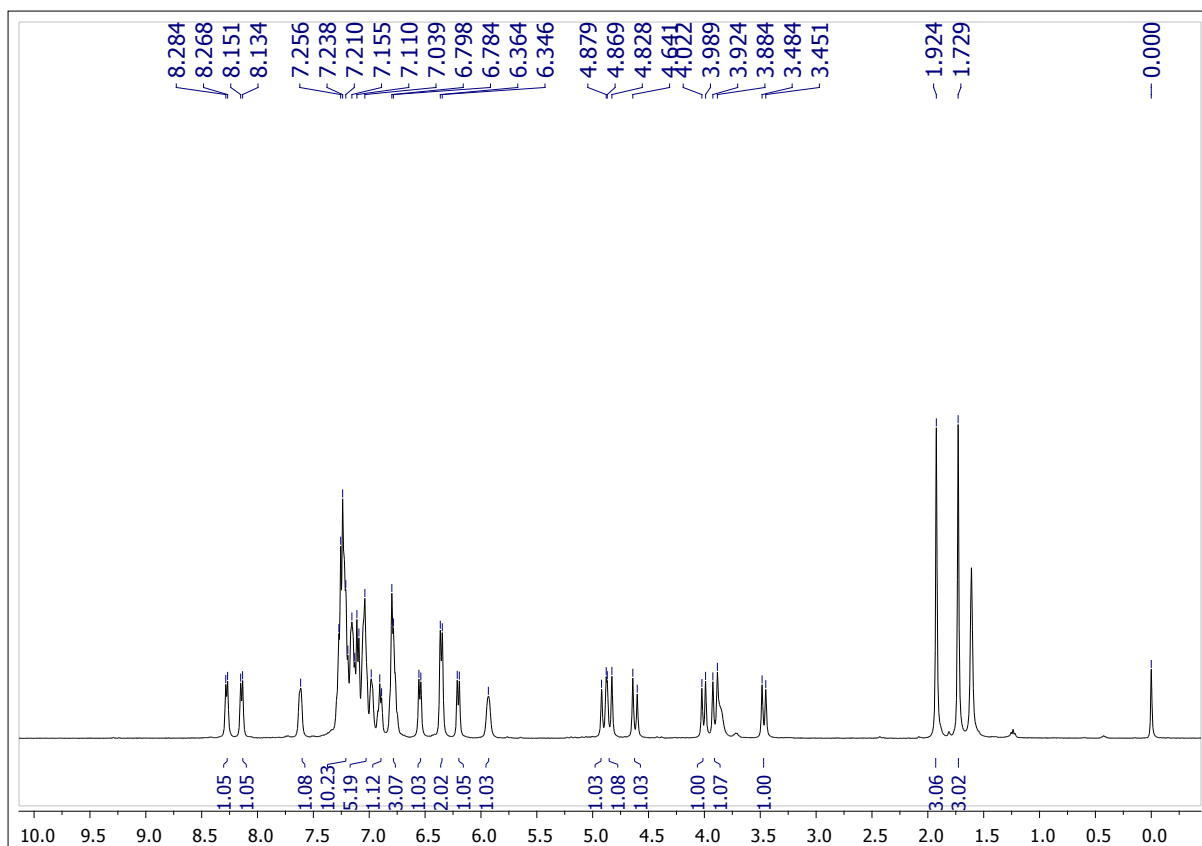

Figure 31.  $^1\text{H}$  NMR spectrum of compound **3k**

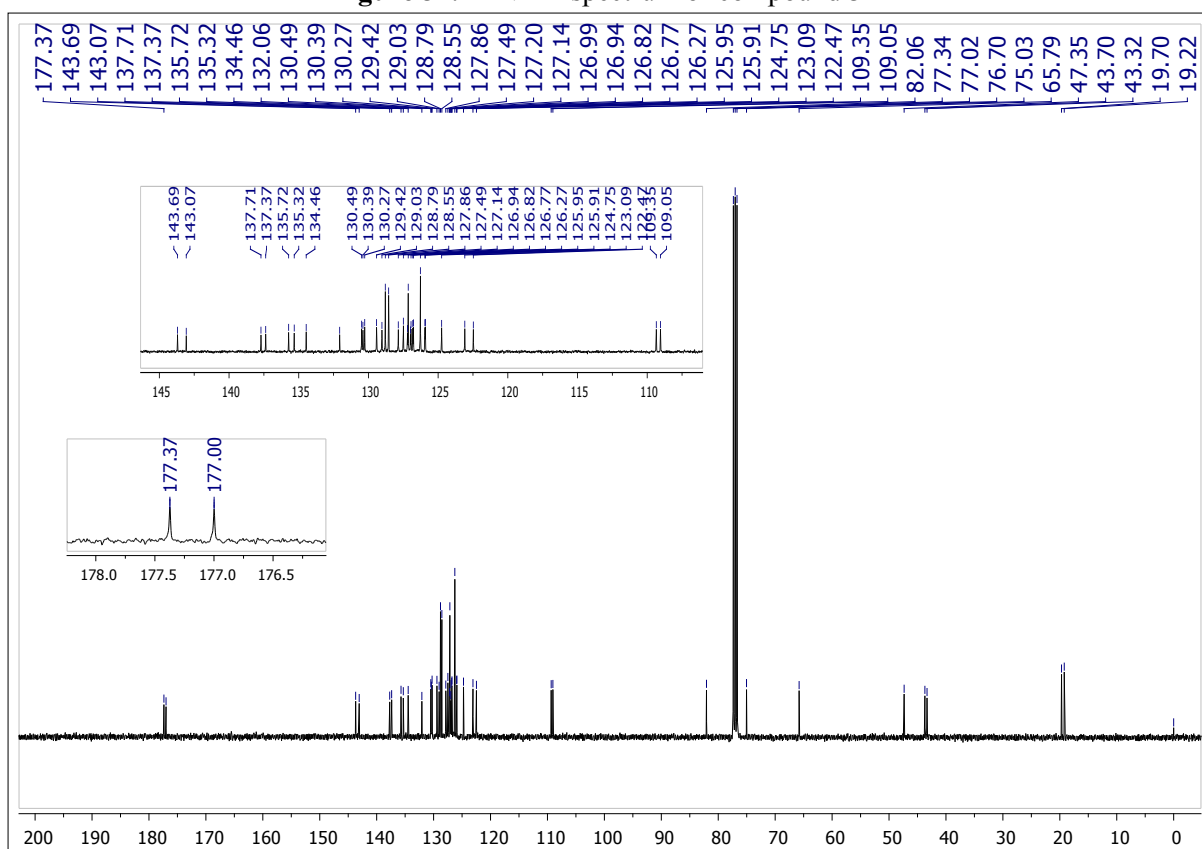

Figure 32.  $^{13}\text{C}$  NMR spectrum of compound **3k**

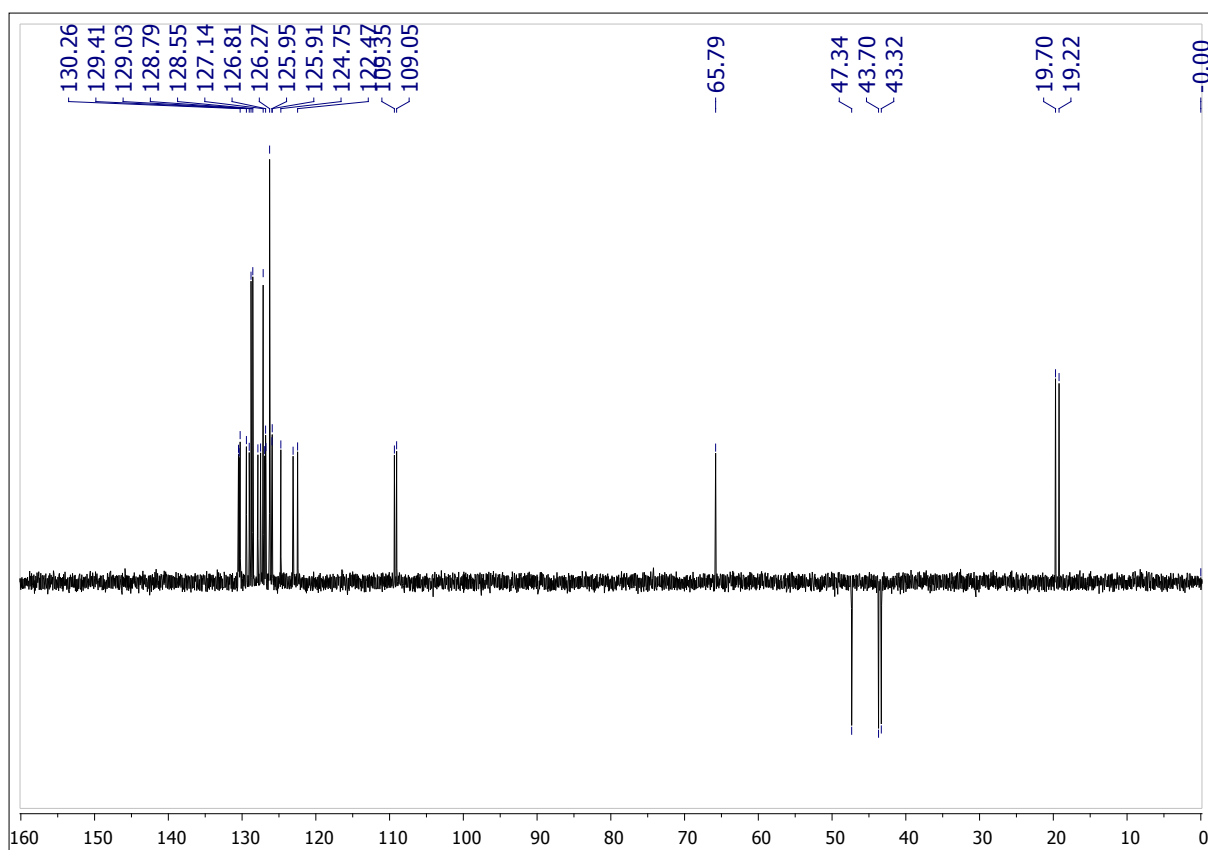

Figure 33. DEPT-135 spectrum of compound 3k

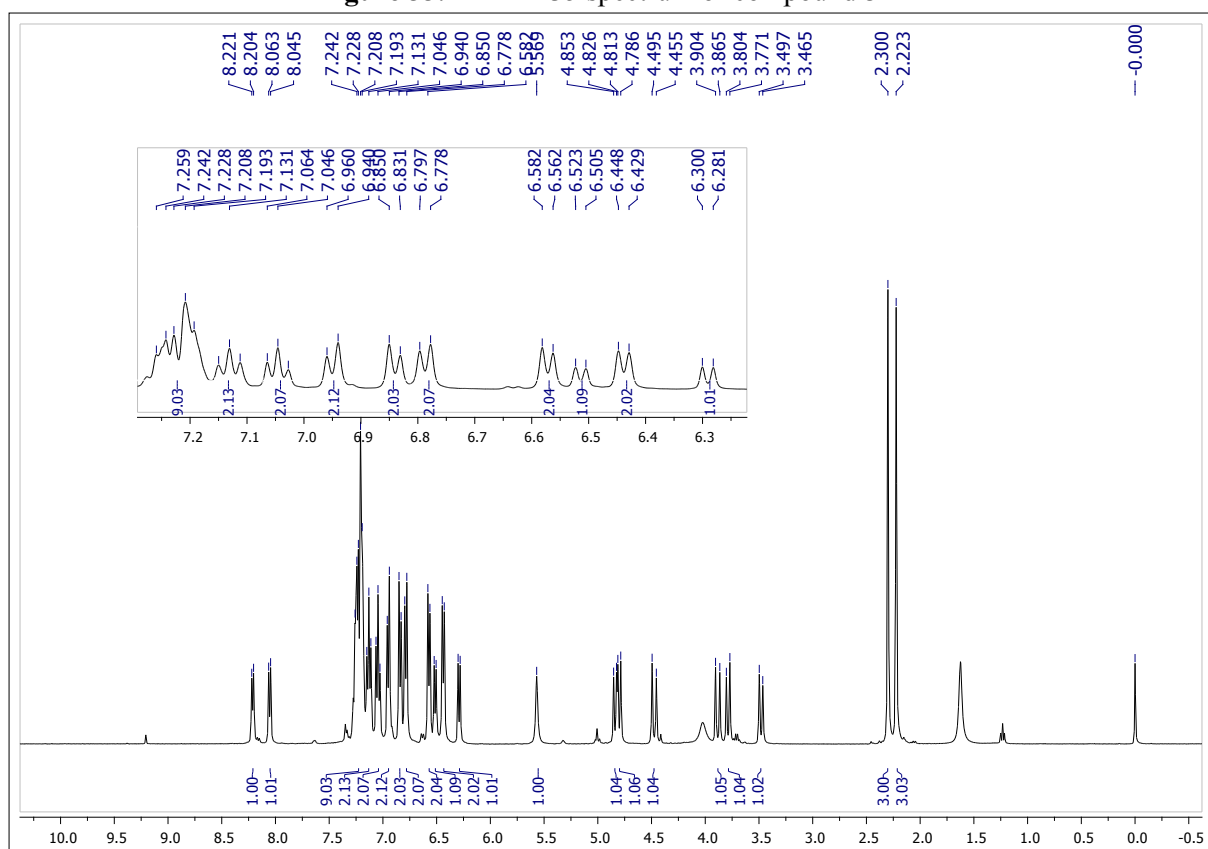

Figure 34. <sup>1</sup>H NMR spectrum of compound 3l

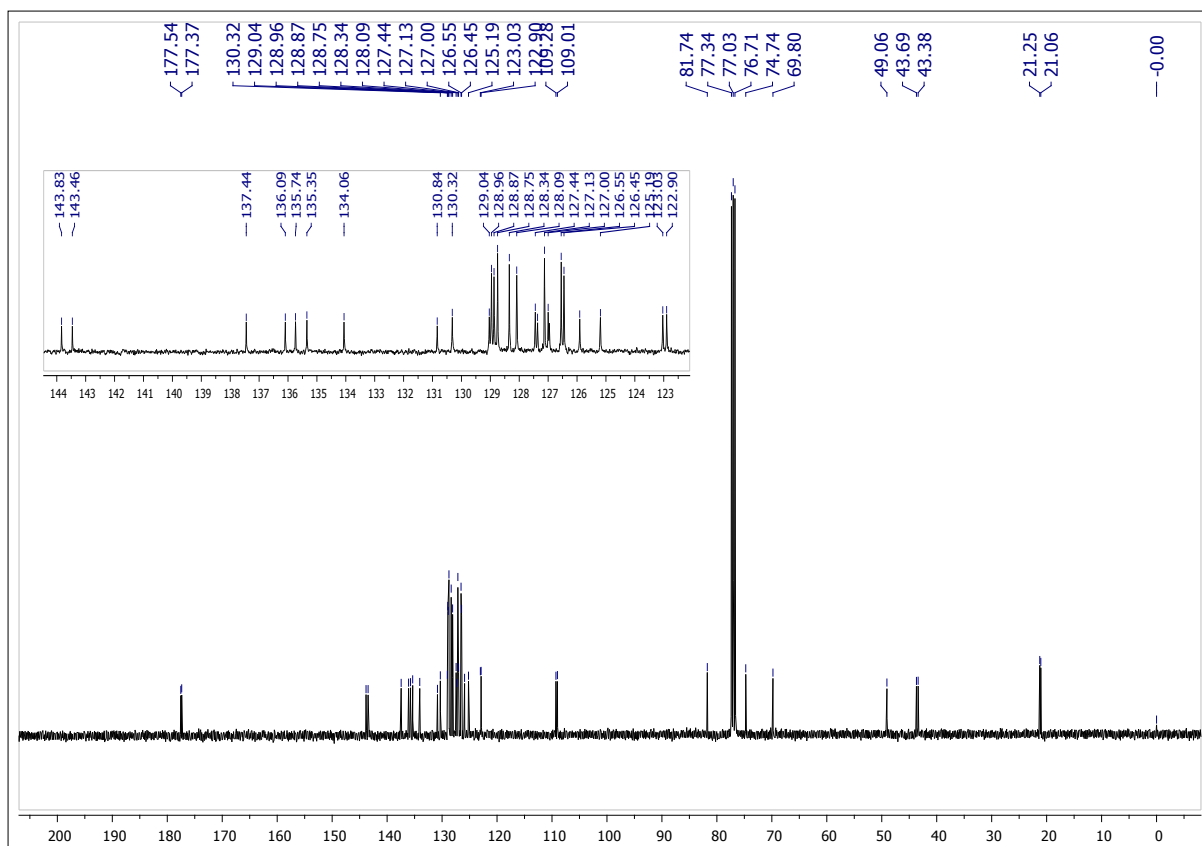

Figure 35.  $^{13}\text{C}$  NMR spectrum of compound **31**

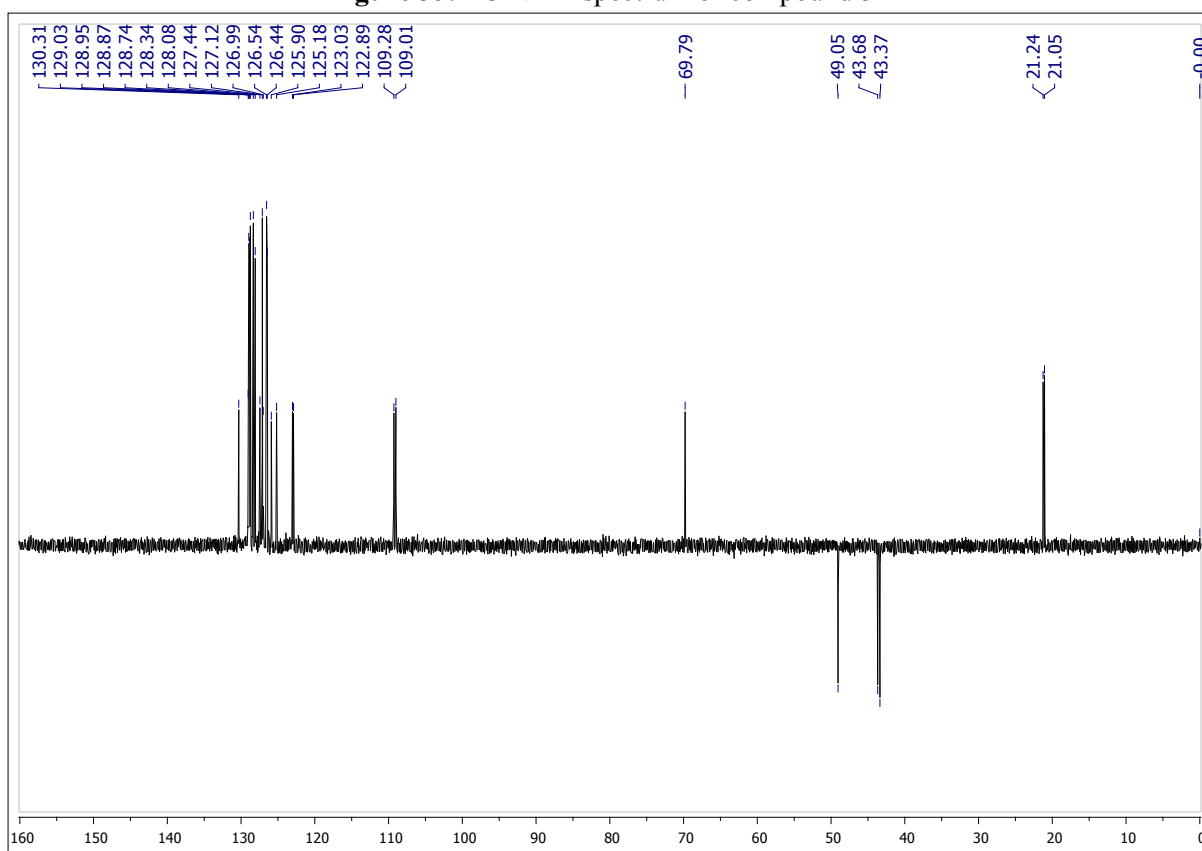

Figure 36. DEPT-135 spectrum of compound **31**

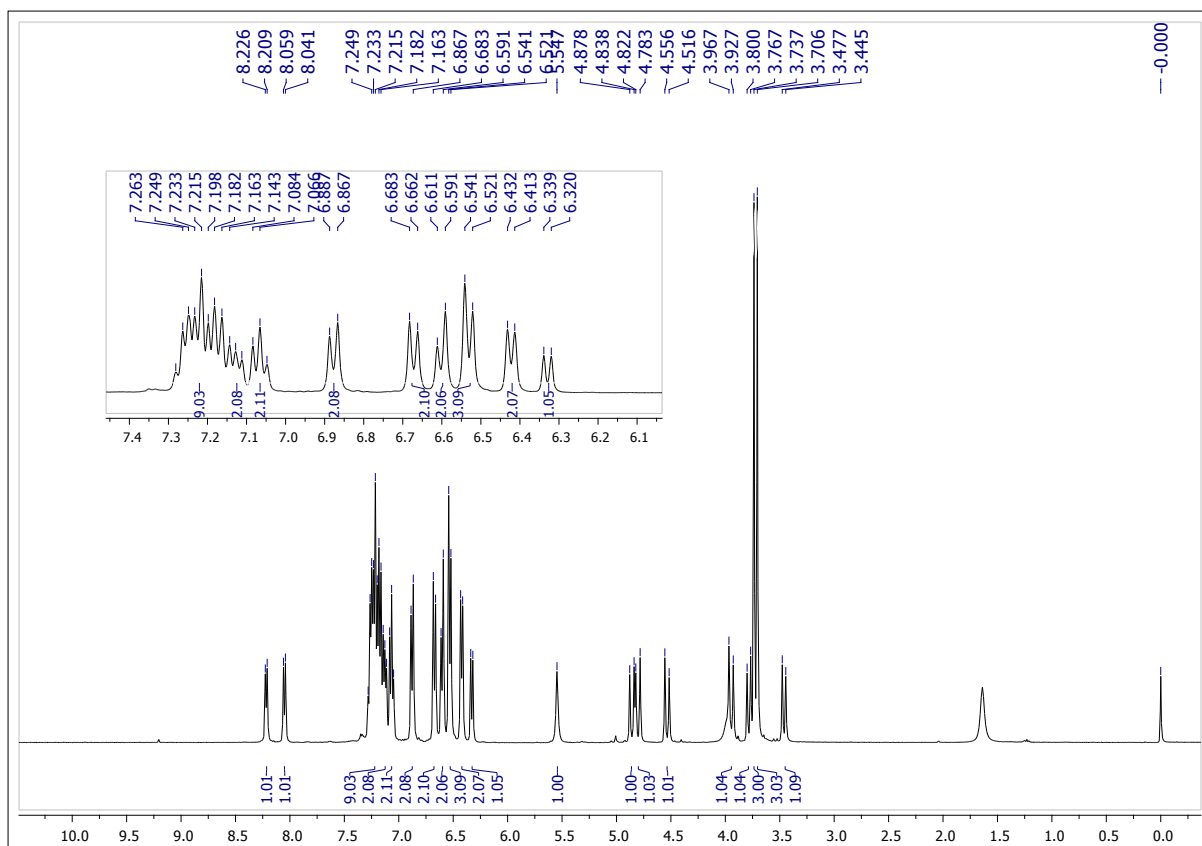

**Figure 37. <sup>1</sup>H NMR spectrum of compound 3m**

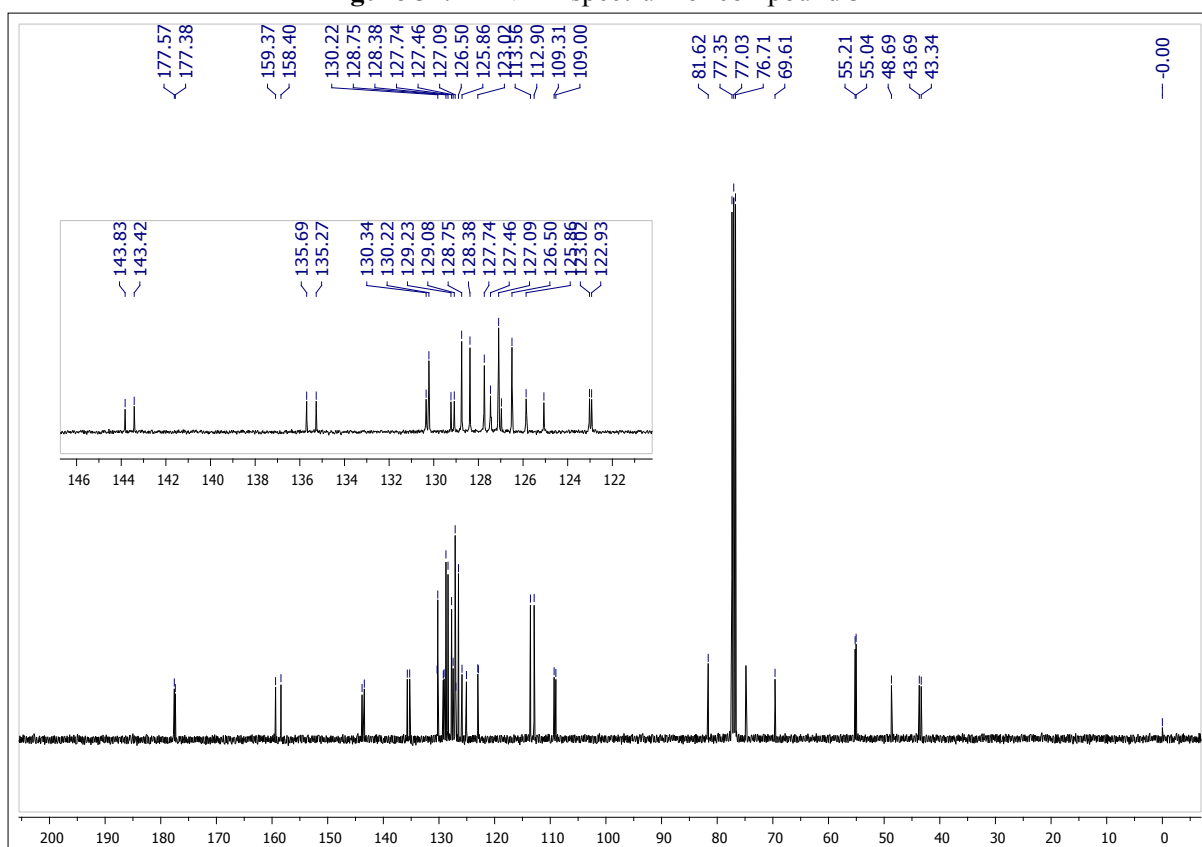

**Figure 38. <sup>13</sup>C NMR spectrum of compound 3m**

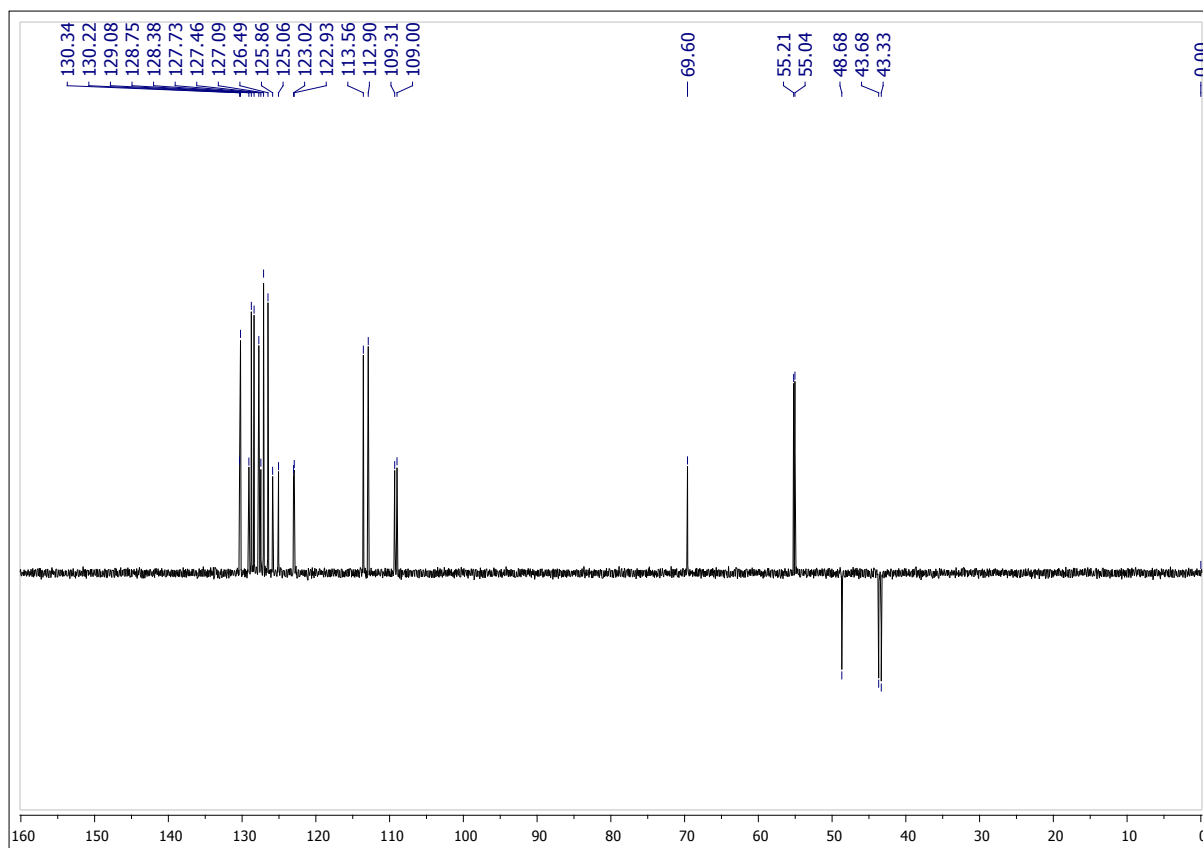

Figure 39. DEPT-135 spectrum of compound 3m

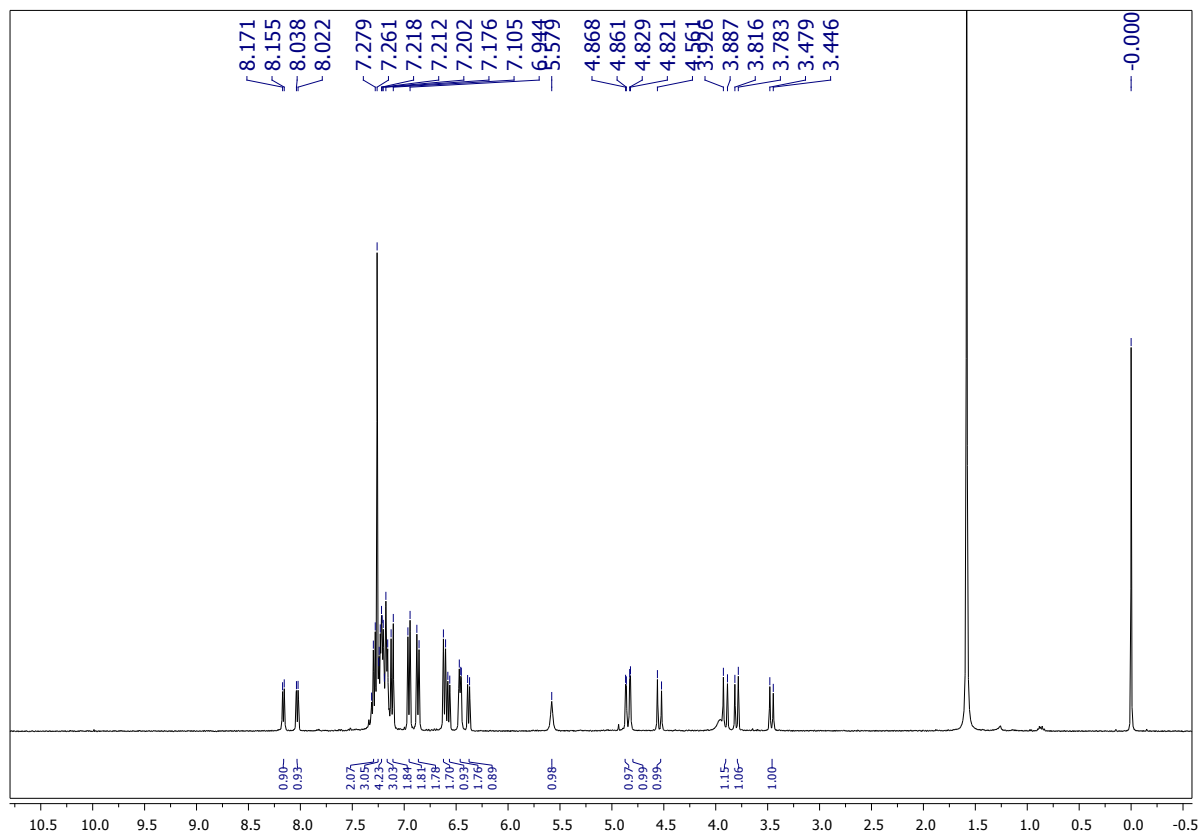

Figure 40. <sup>1</sup>H NMR spectrum of compound 3n

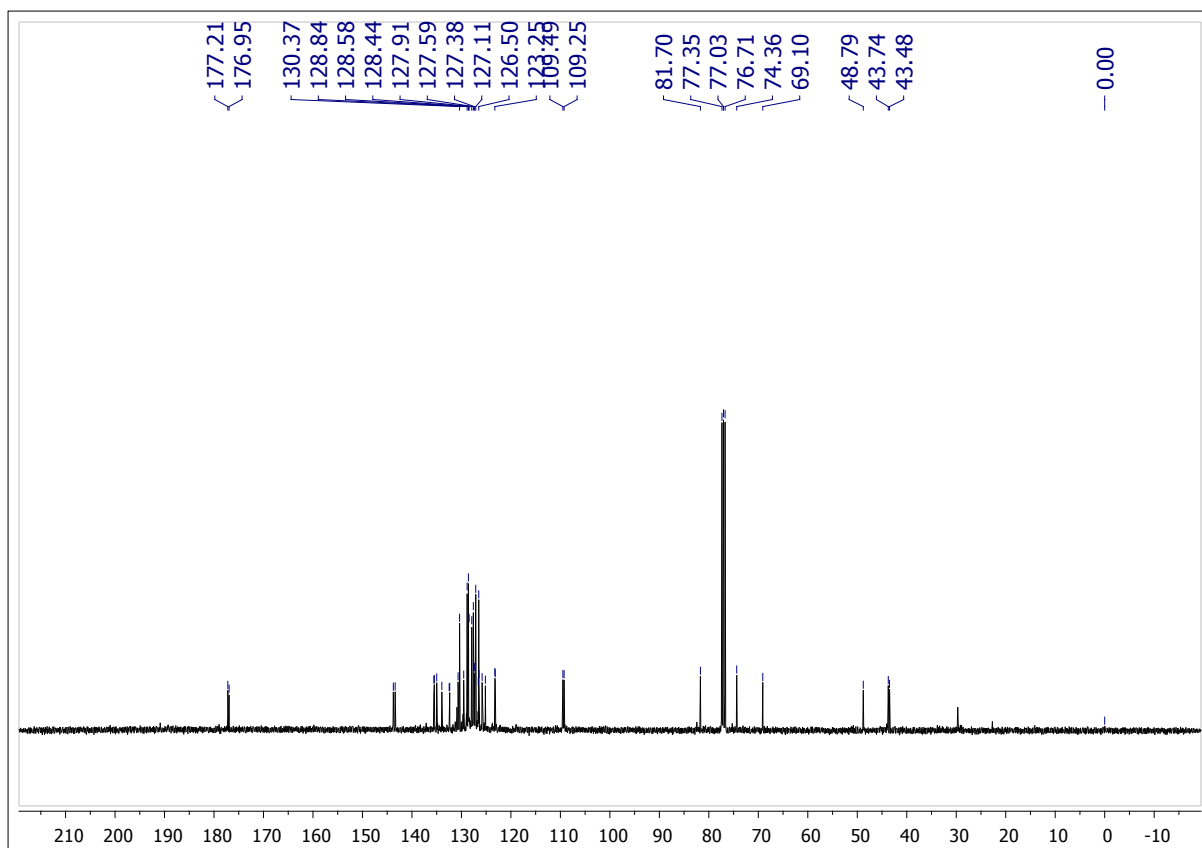

Figure 41.  $^{13}\text{C}$  NMR spectrum of compound **3n**

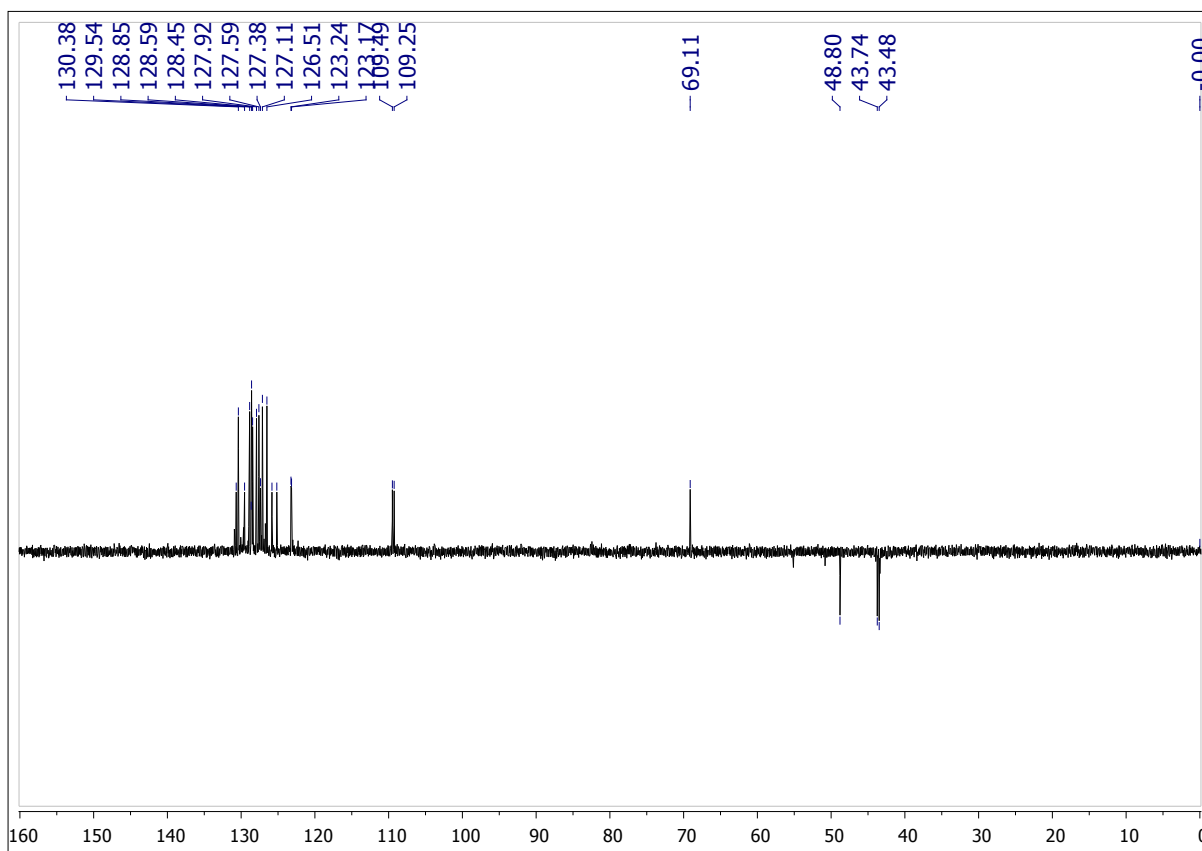

Figure 42. DEPT-135 spectrum of compound **3n**

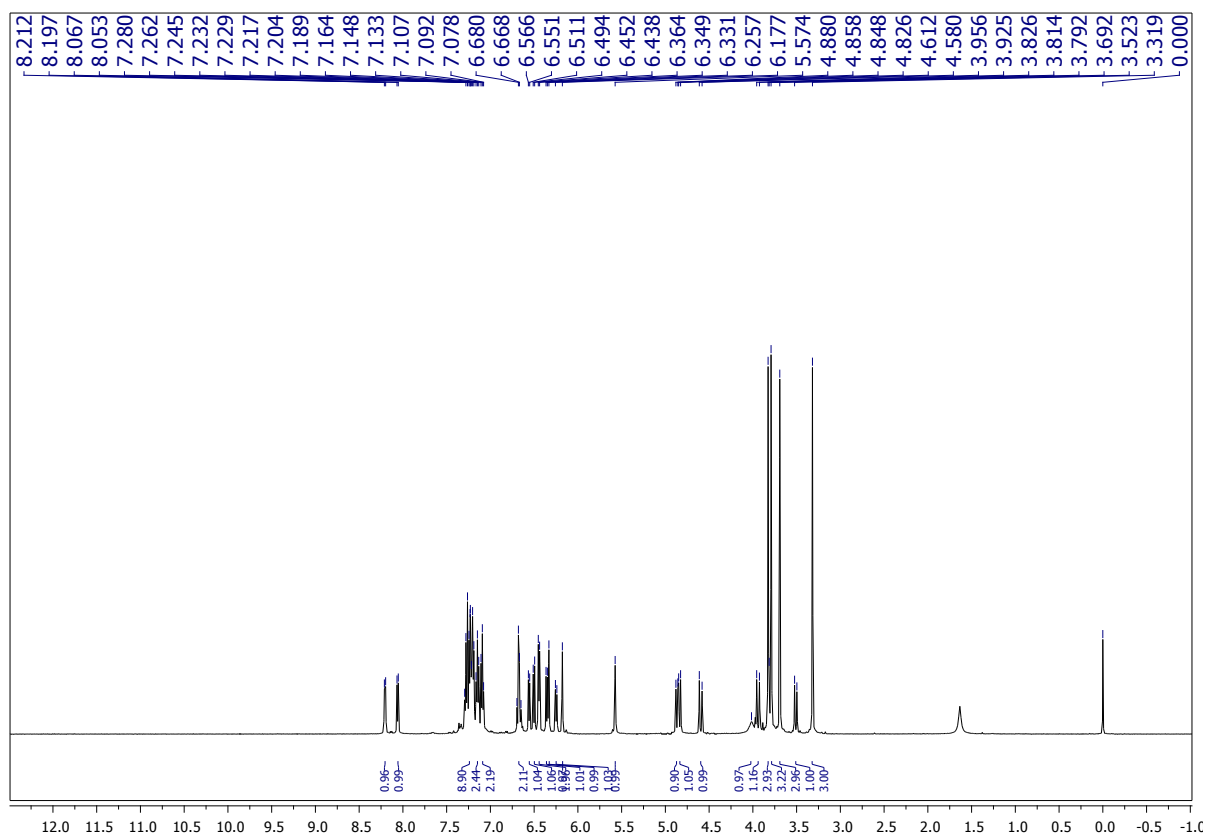

**Figure 43. <sup>1</sup>H NMR spectrum of compound 3o**

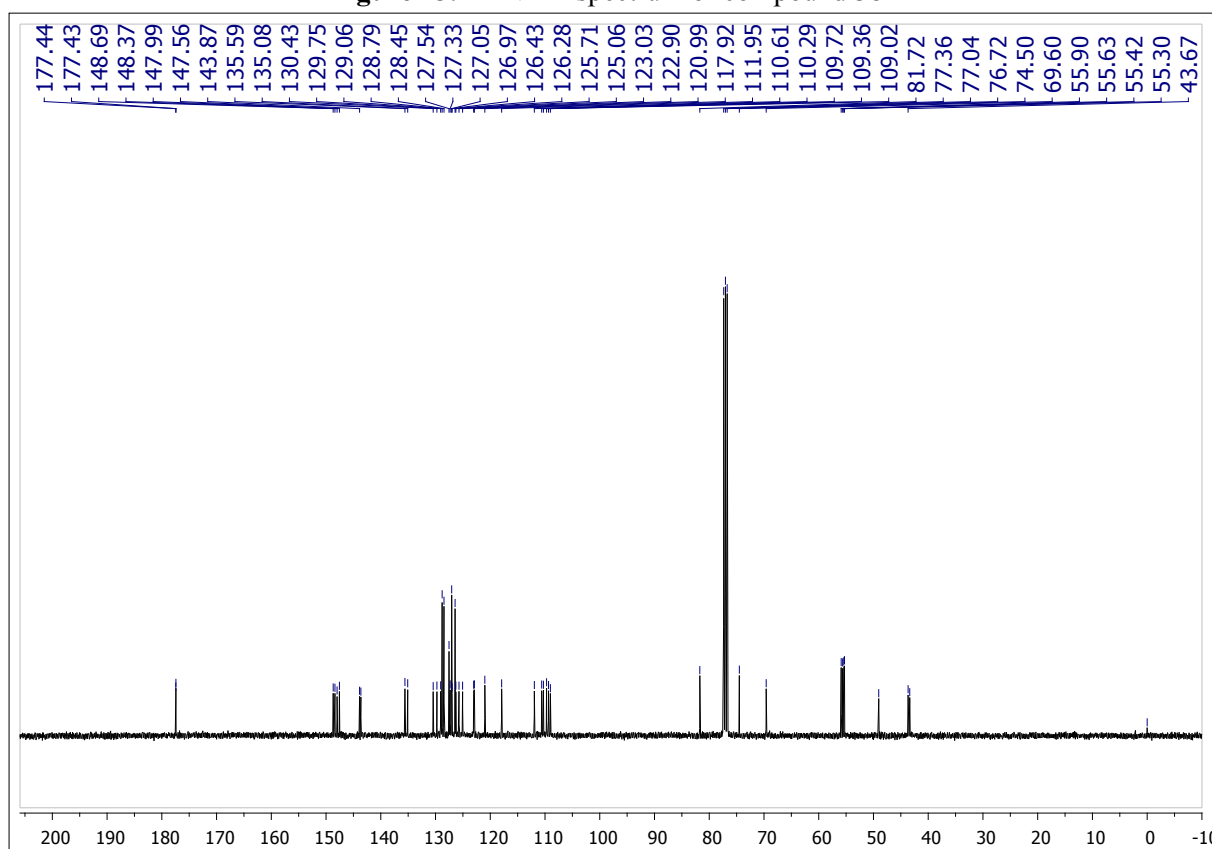

**Figure 44. <sup>13</sup>C NMR spectrum of compound 3o**

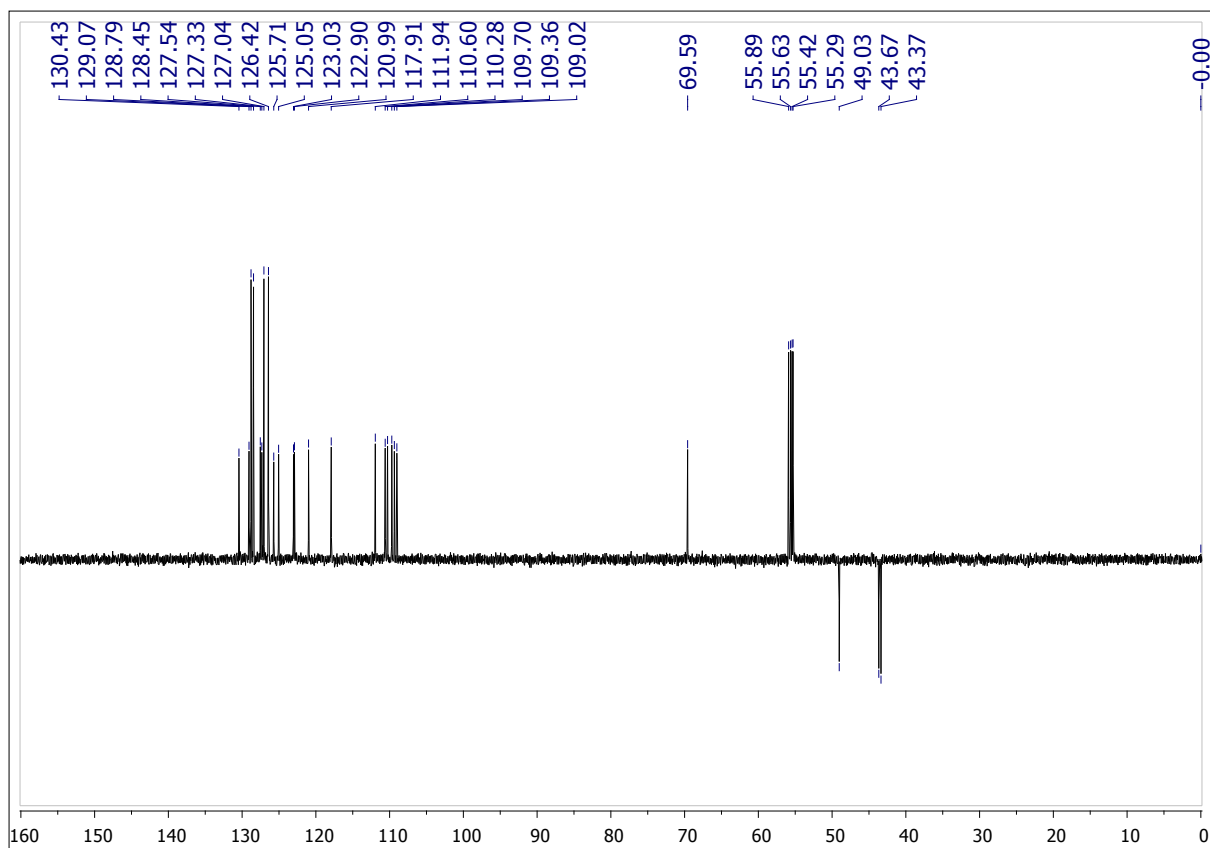

Figure 45. DEPT-135 spectrum of compound **3o**

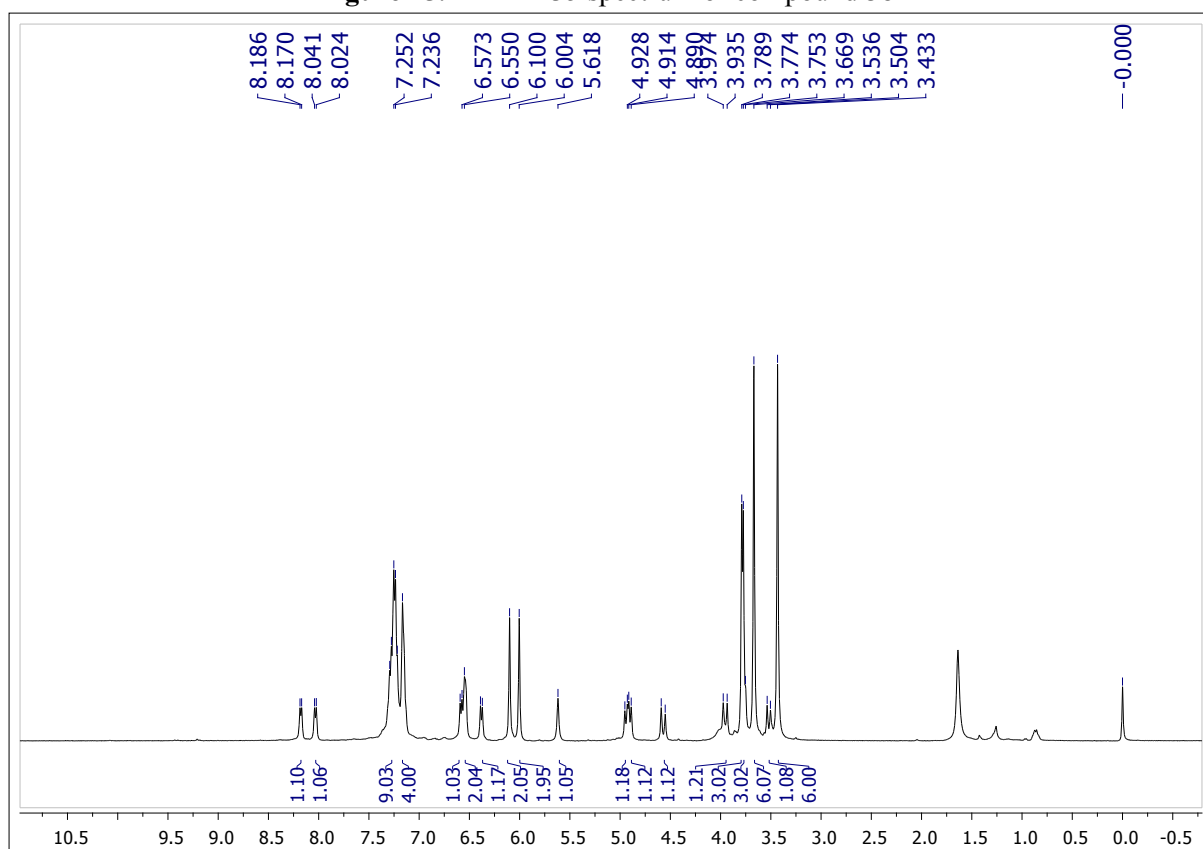

Figure 46. <sup>1</sup>H NMR spectrum of compound **3p**



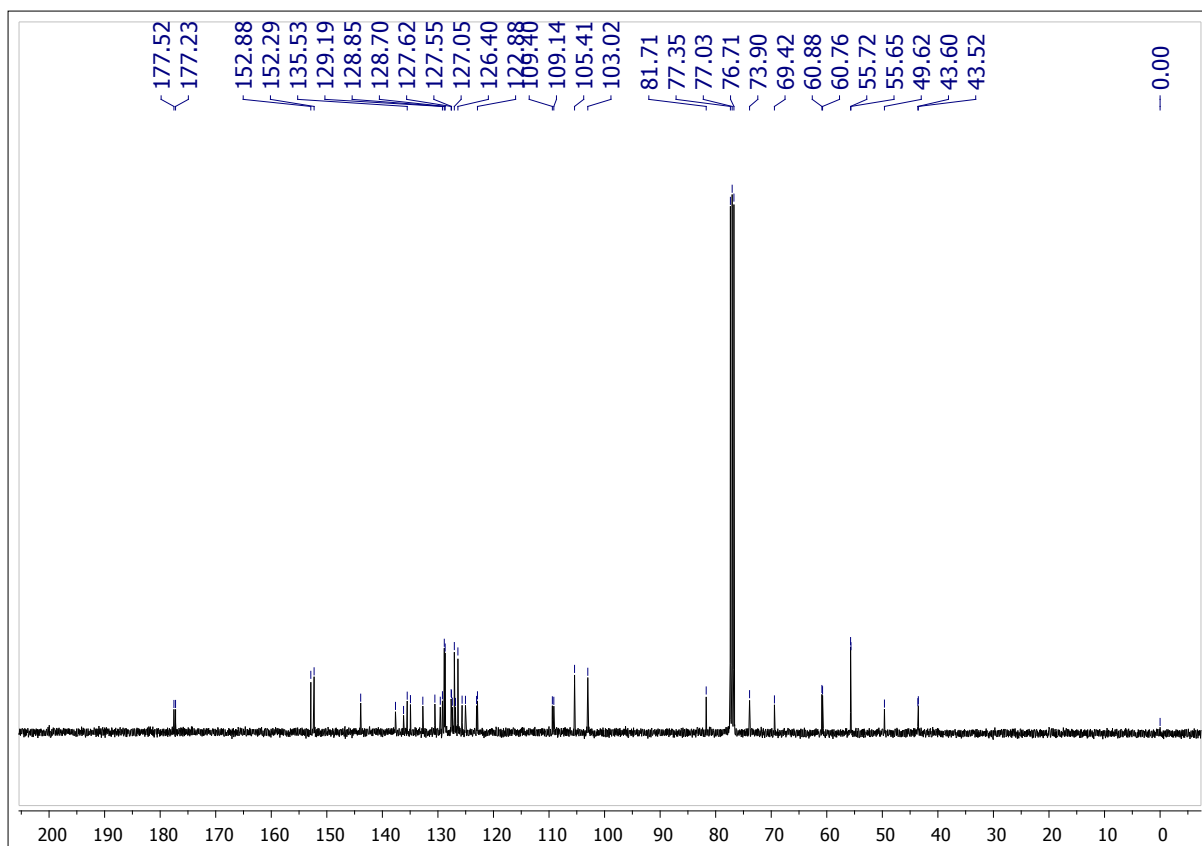

Figure 47.  $^{13}\text{C}$  NMR spectrum of compound **3p**

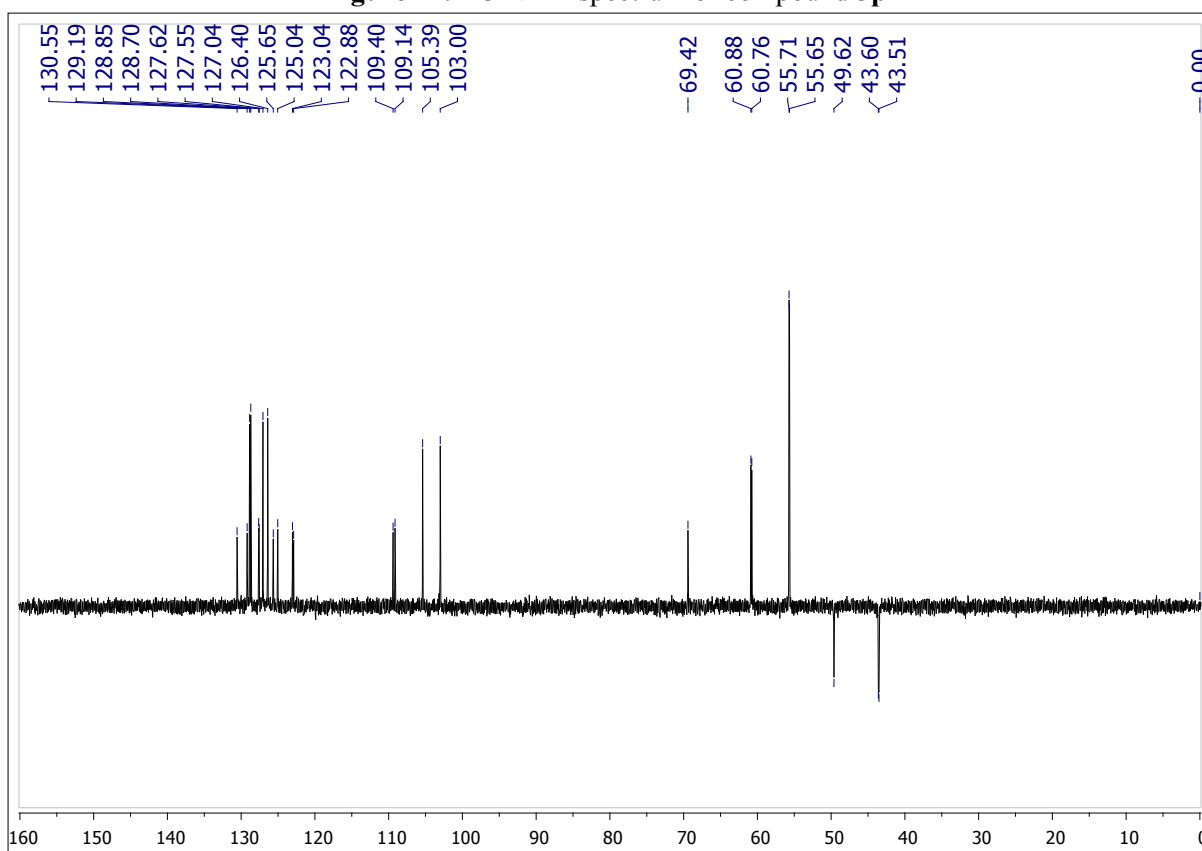

Figure 48. DEPT-135 spectrum of compound **3p**

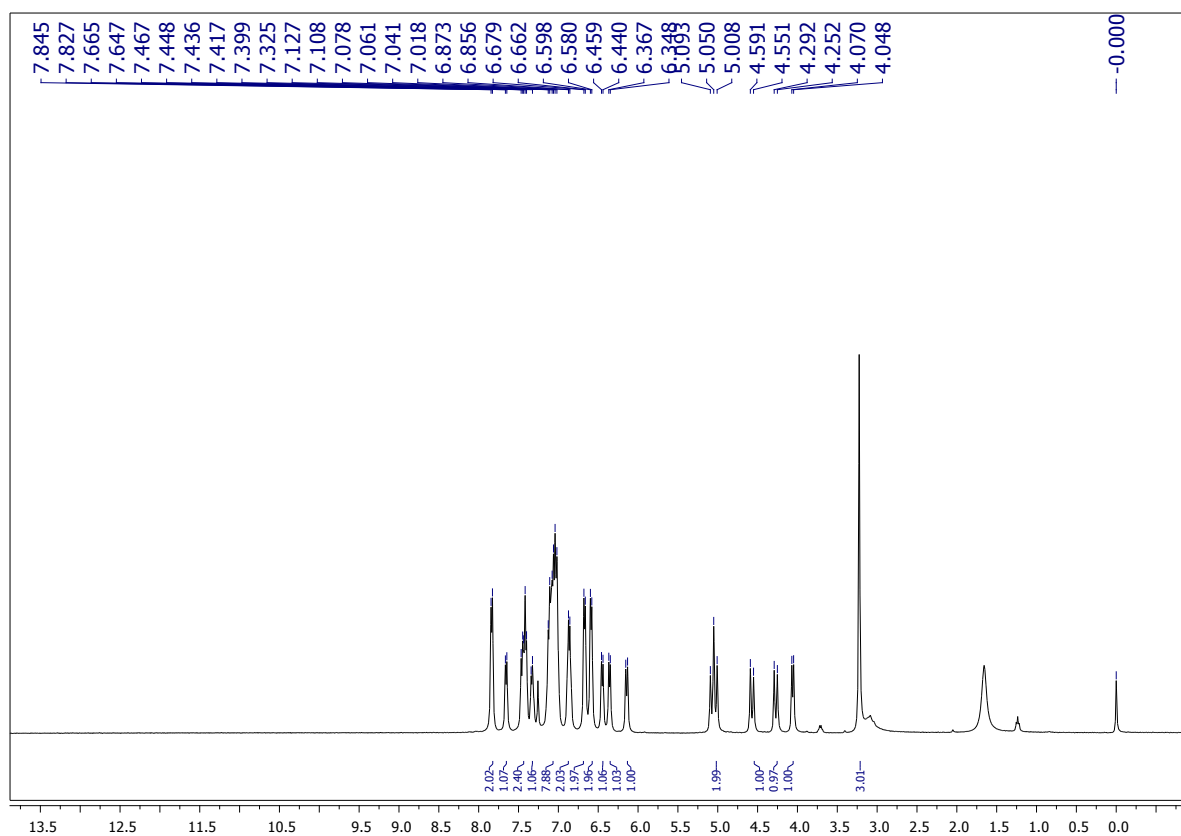

Figure 49.  $^1\text{H}$  NMR spectrum of compound **5a**

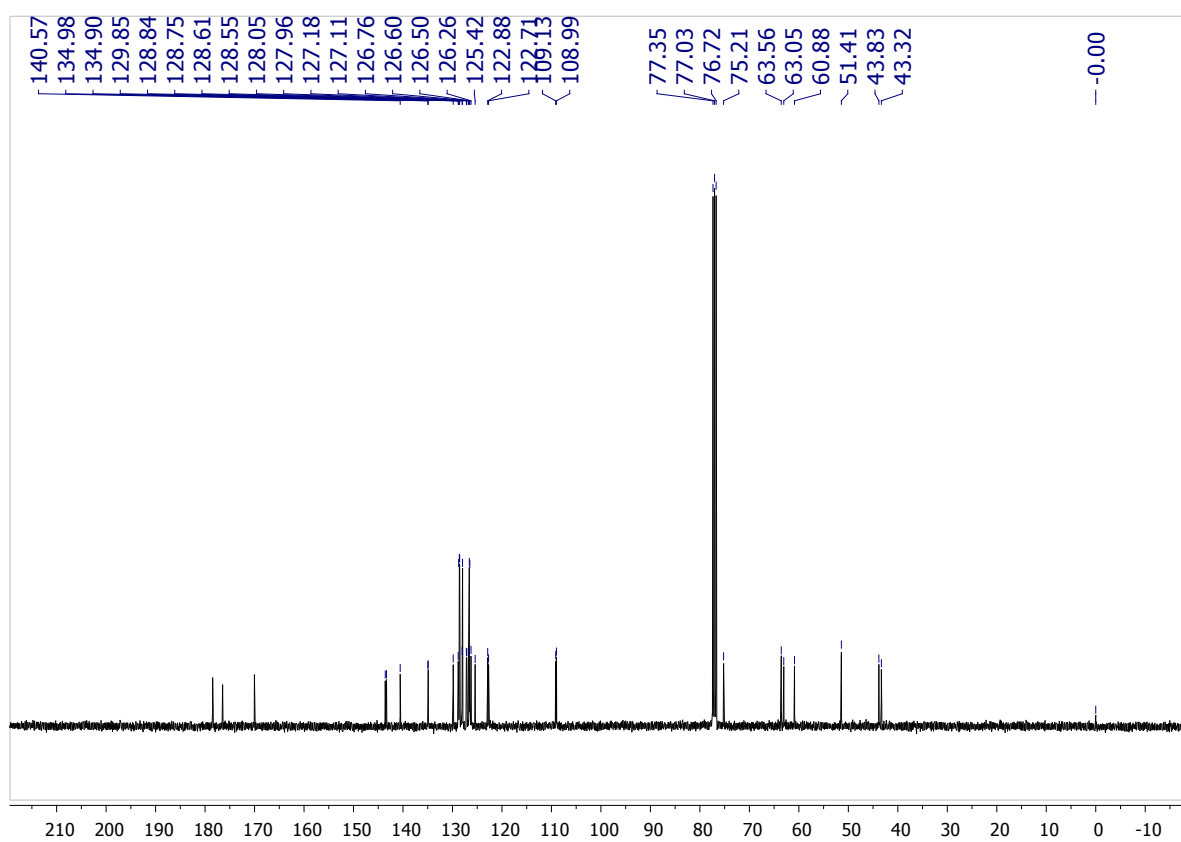

Figure 50.  $^{13}\text{C}$  NMR spectrum of compound **5b**

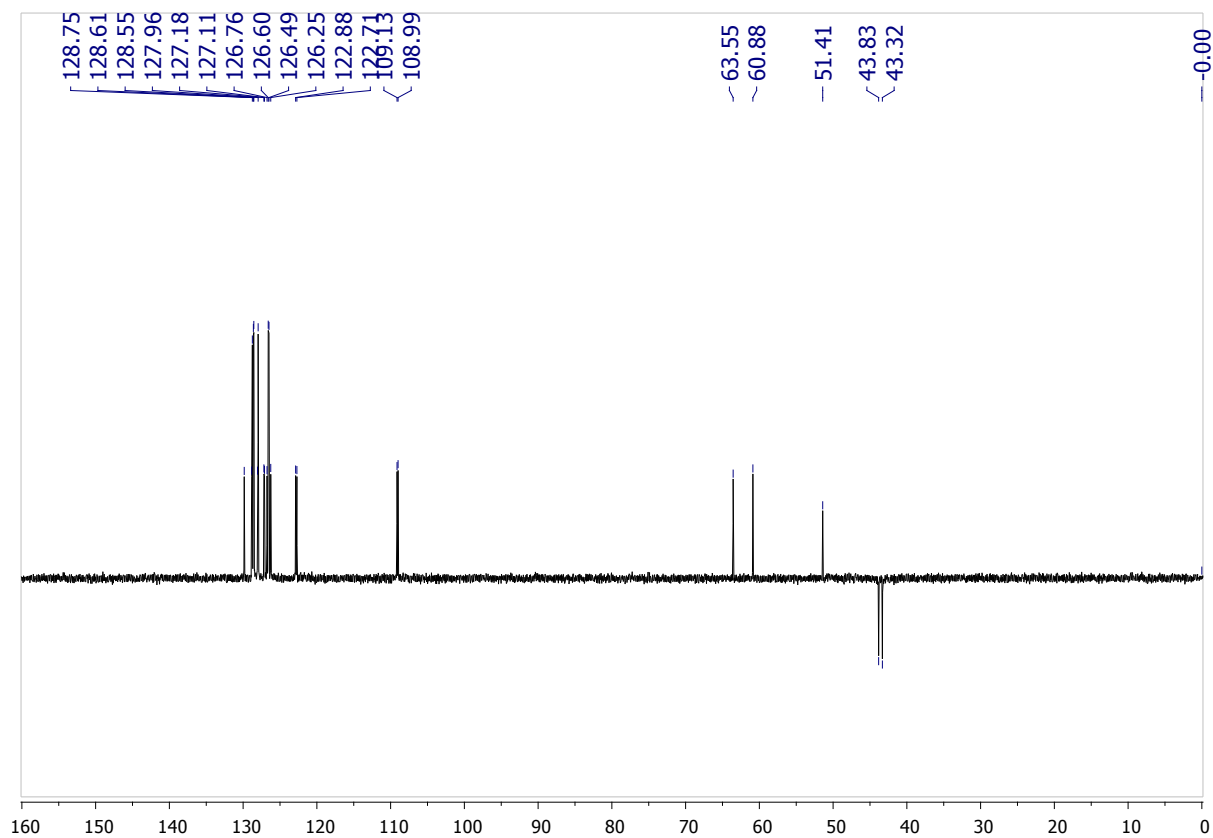

Figure 51. DEPT-135 spectrum of compound 5a

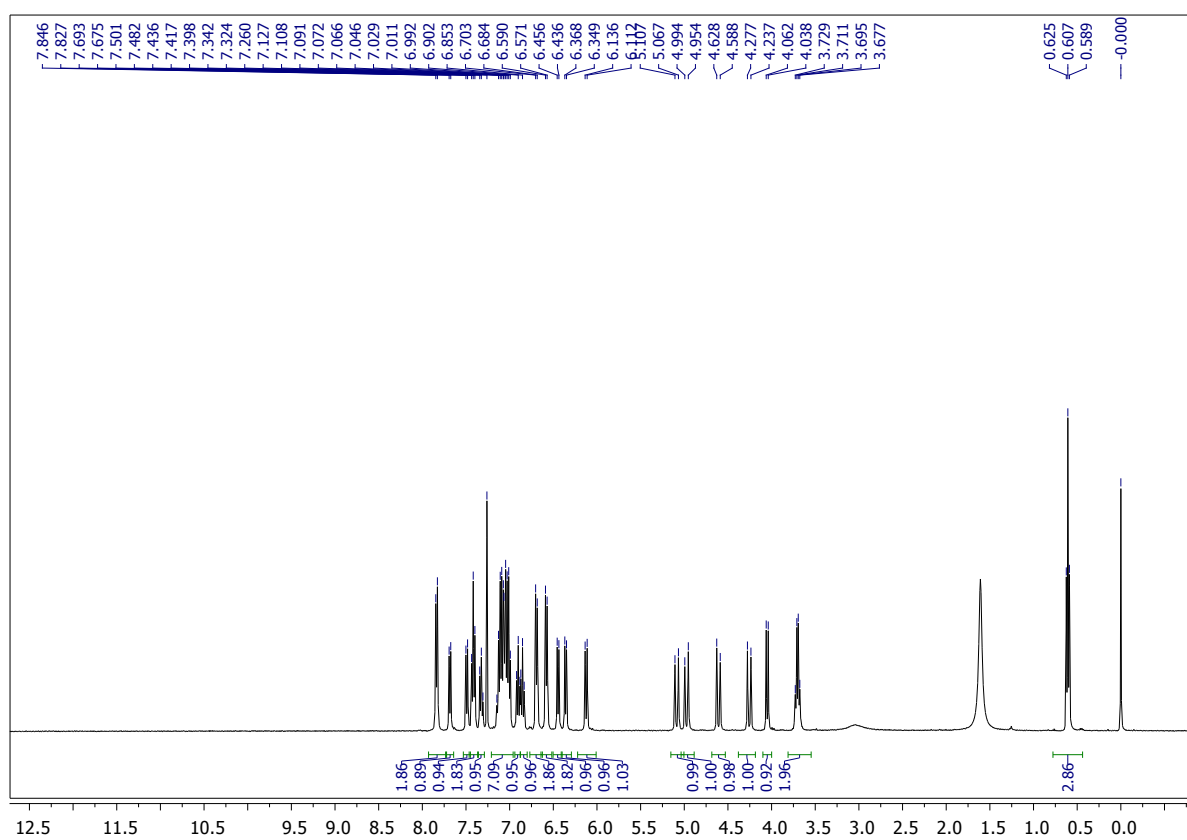

Figure 52. <sup>1</sup>H NMR spectrum of compound 5b

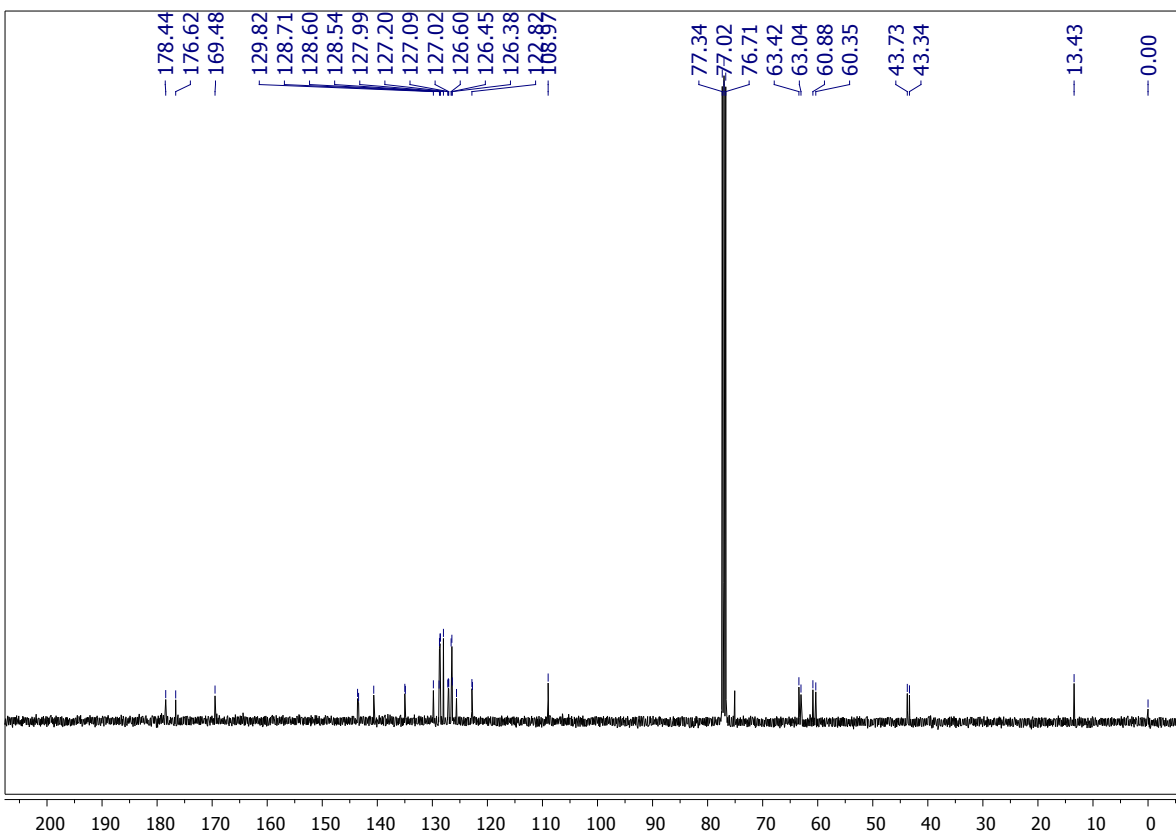

**Figure 53.**  $^{13}\text{C}$  NMR spectrum of compound **5b**

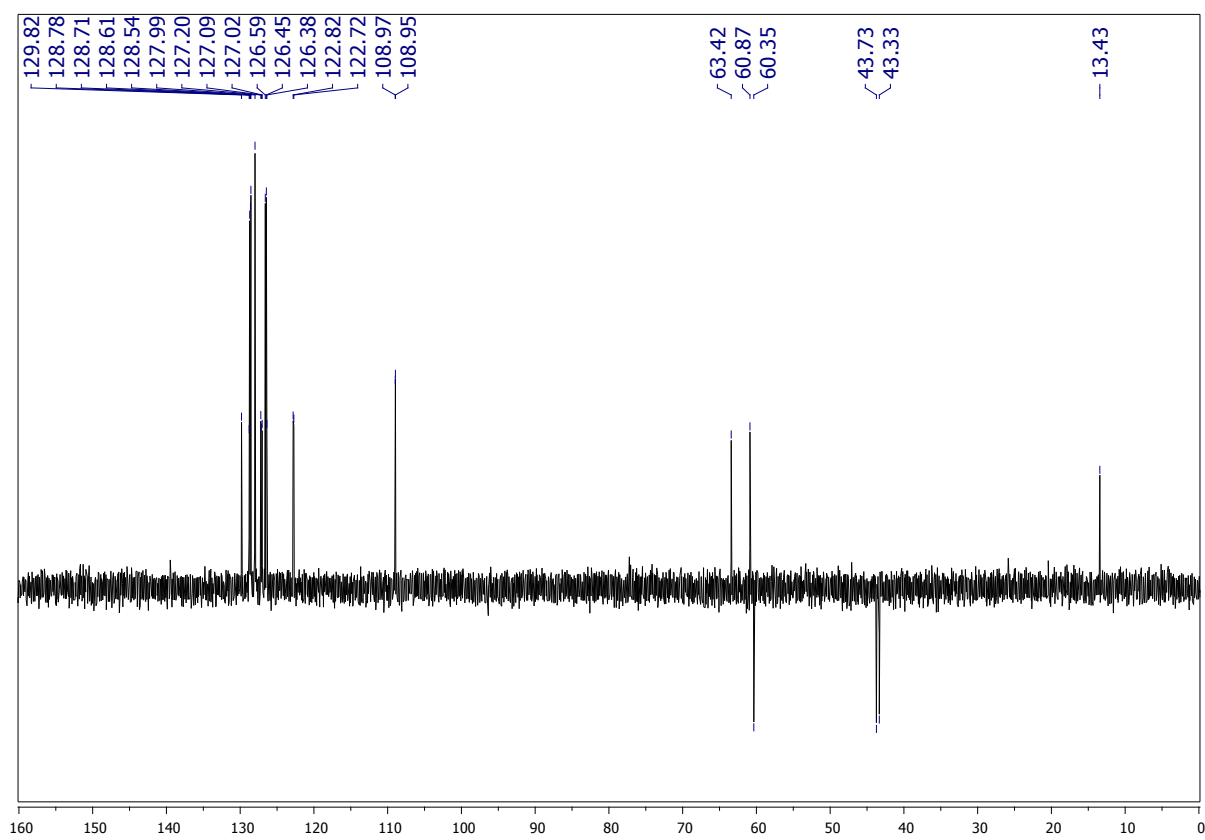

**Figure 54.** DEPT-135 spectrum of compound **5b**



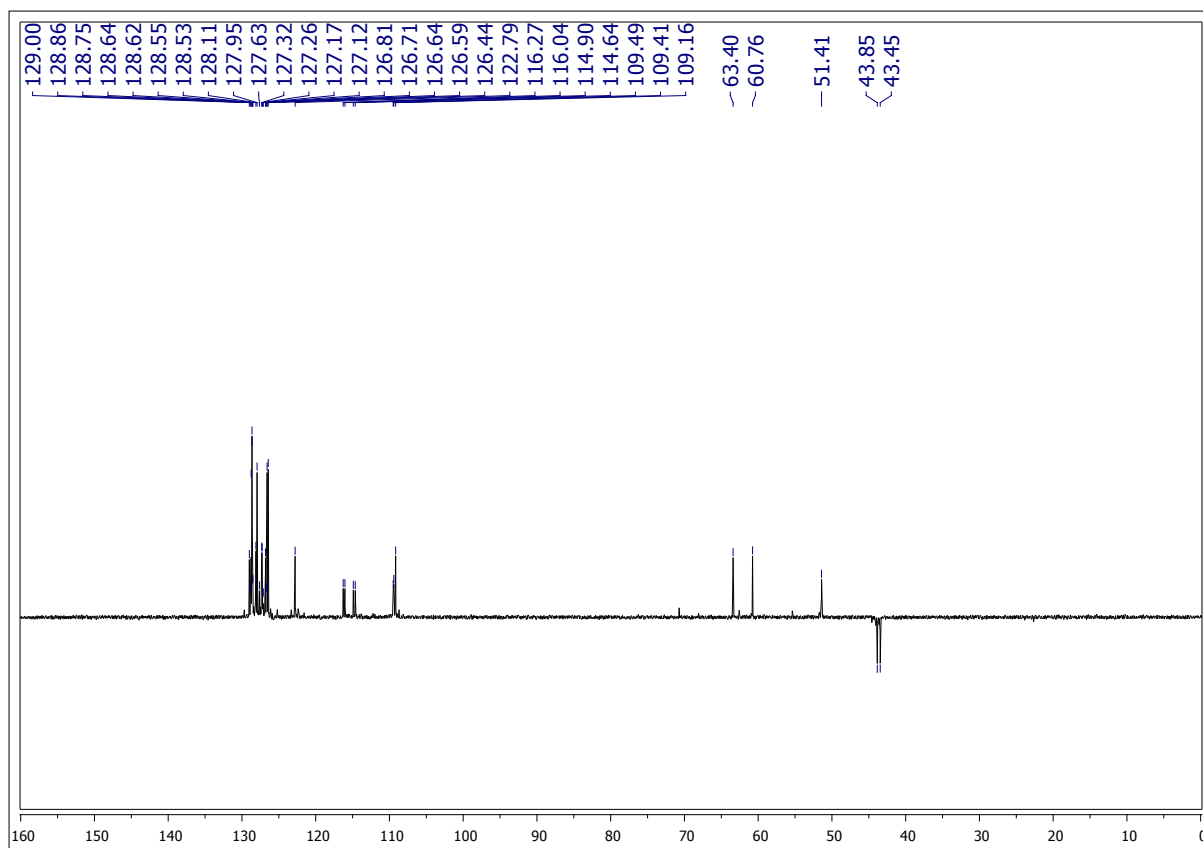

Figure 57. DEPT-135 spectrum of compound 5c

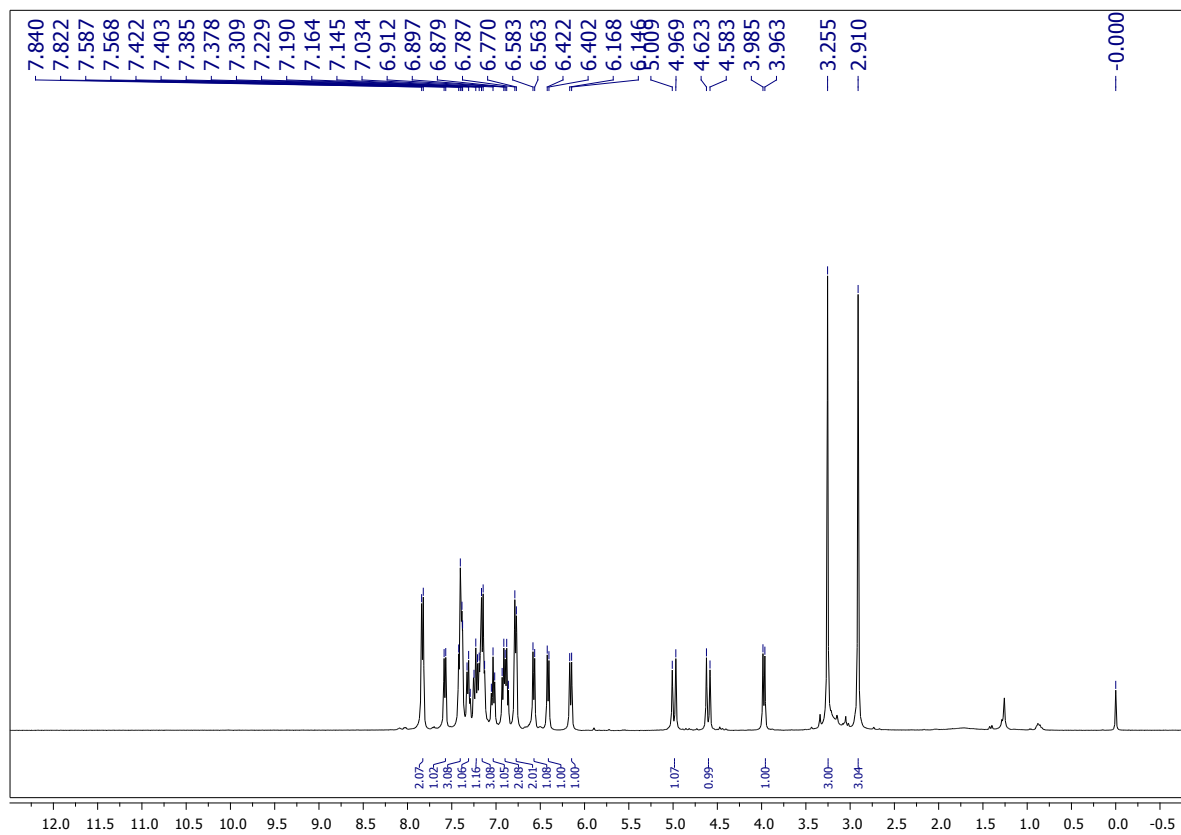

Figure 58. <sup>1</sup>H NMR spectrum of compound 5d

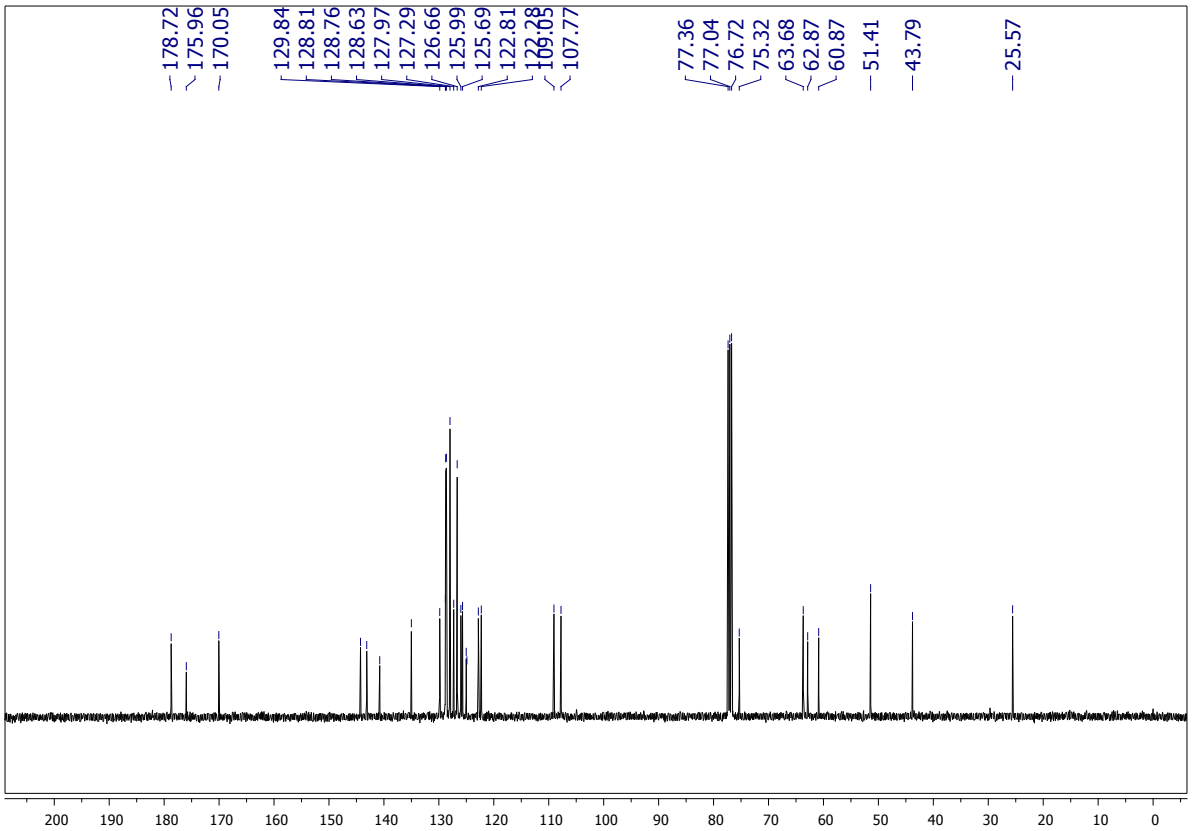

Figure 59.  $^{13}\text{C}$  NMR spectrum of compound **5d**

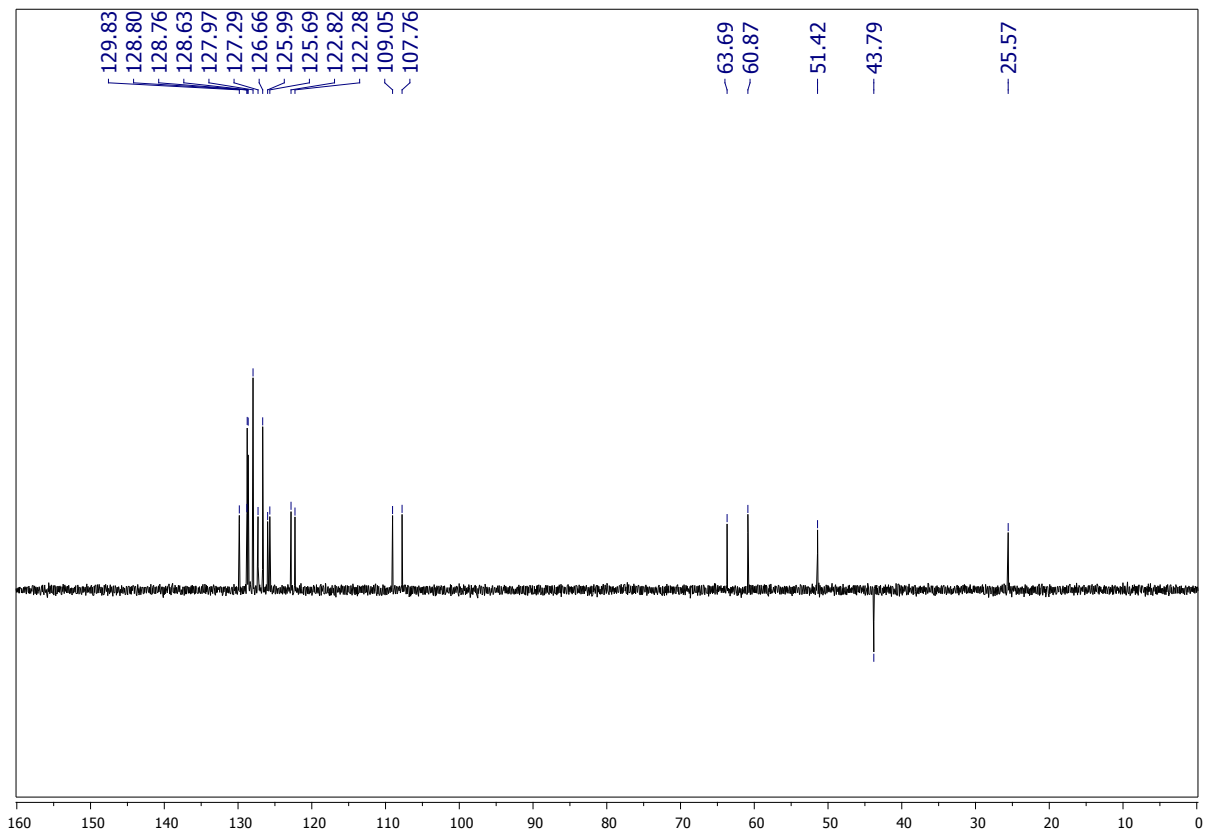

Figure 60. DEPT-135 spectrum of compound **5d**

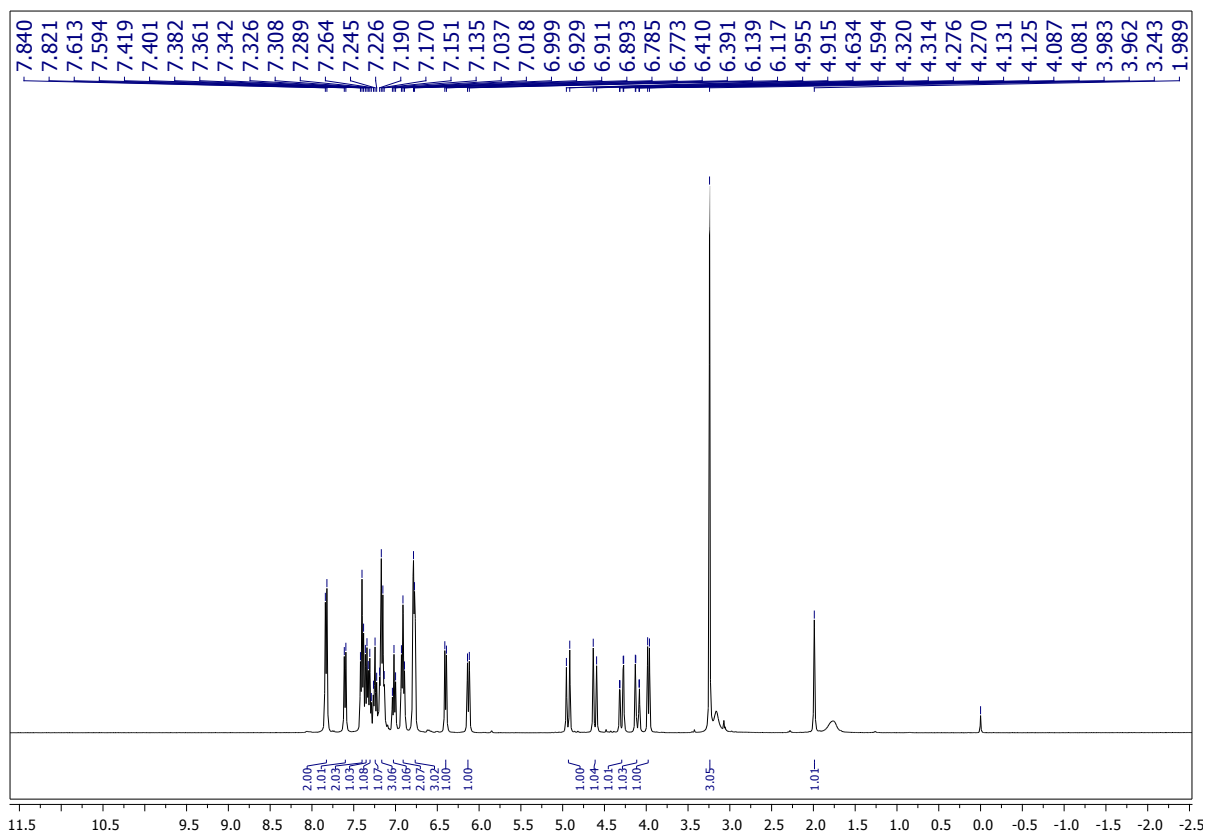

Figure 61.  $^1\text{H}$  NMR spectrum of compound **5e**

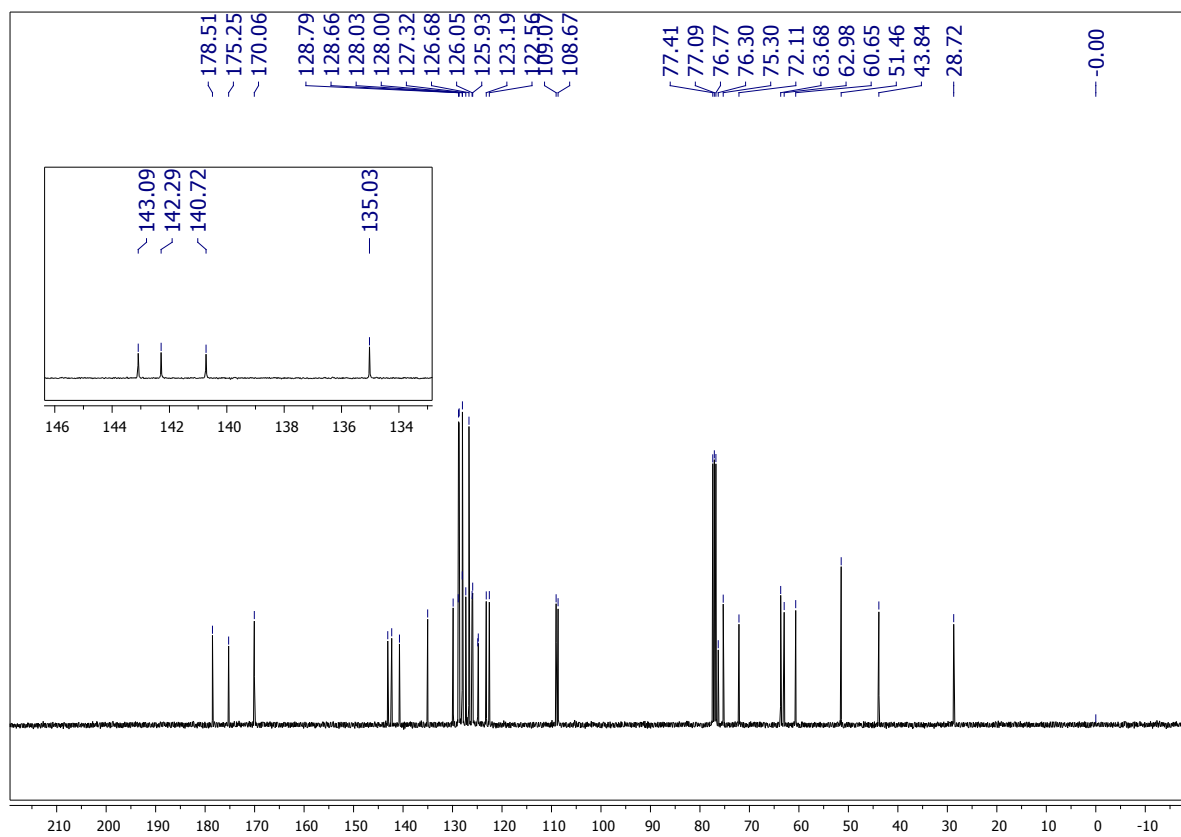

Figure 62.  $^{13}\text{C}$  NMR spectrum of compound **5e**



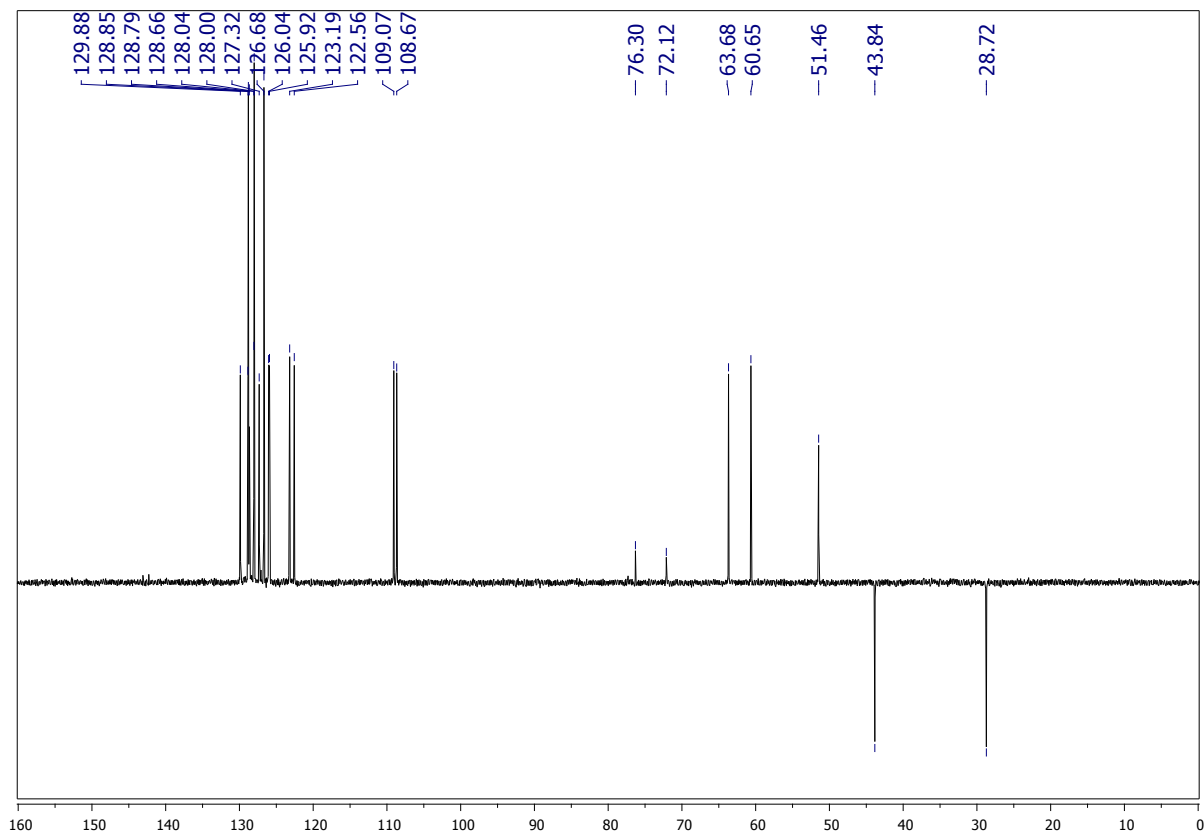

Figure 63. DEPT-135 spectrum of compound 5e

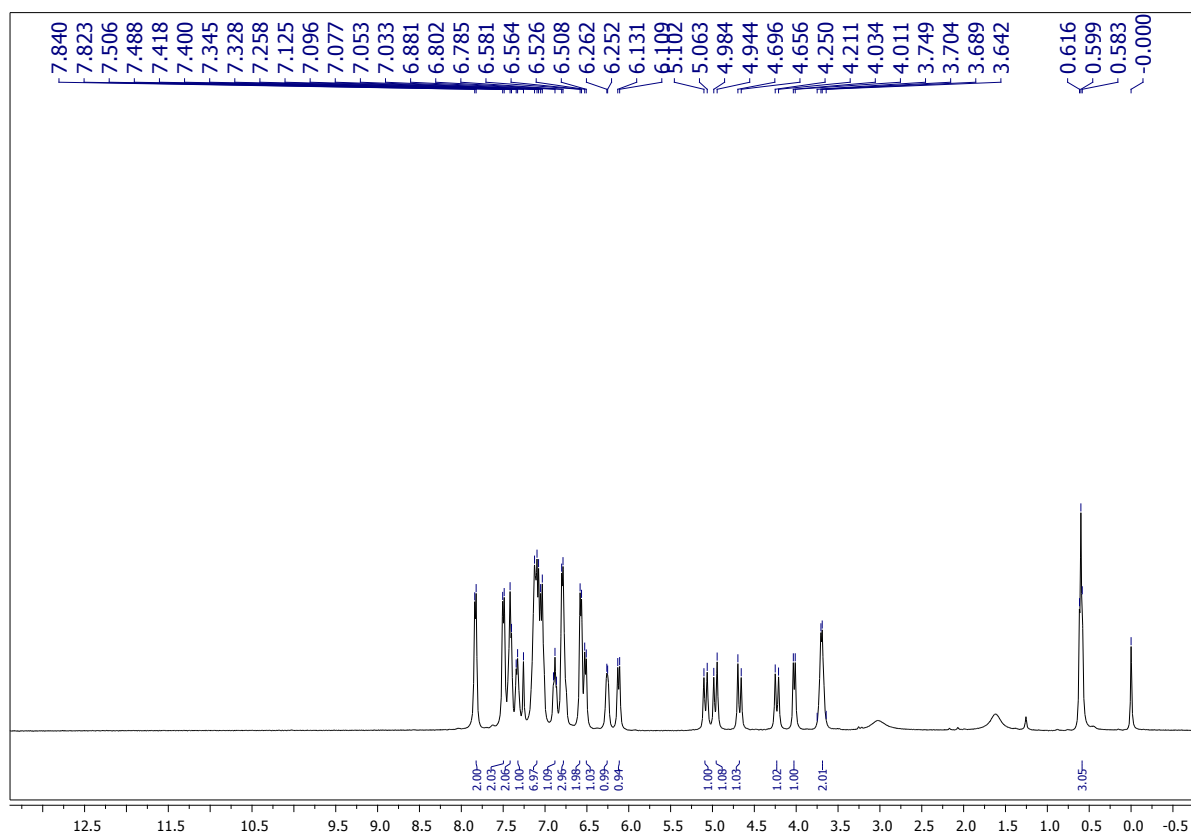

Figure 64. <sup>1</sup>H NMR spectrum of compound 5f

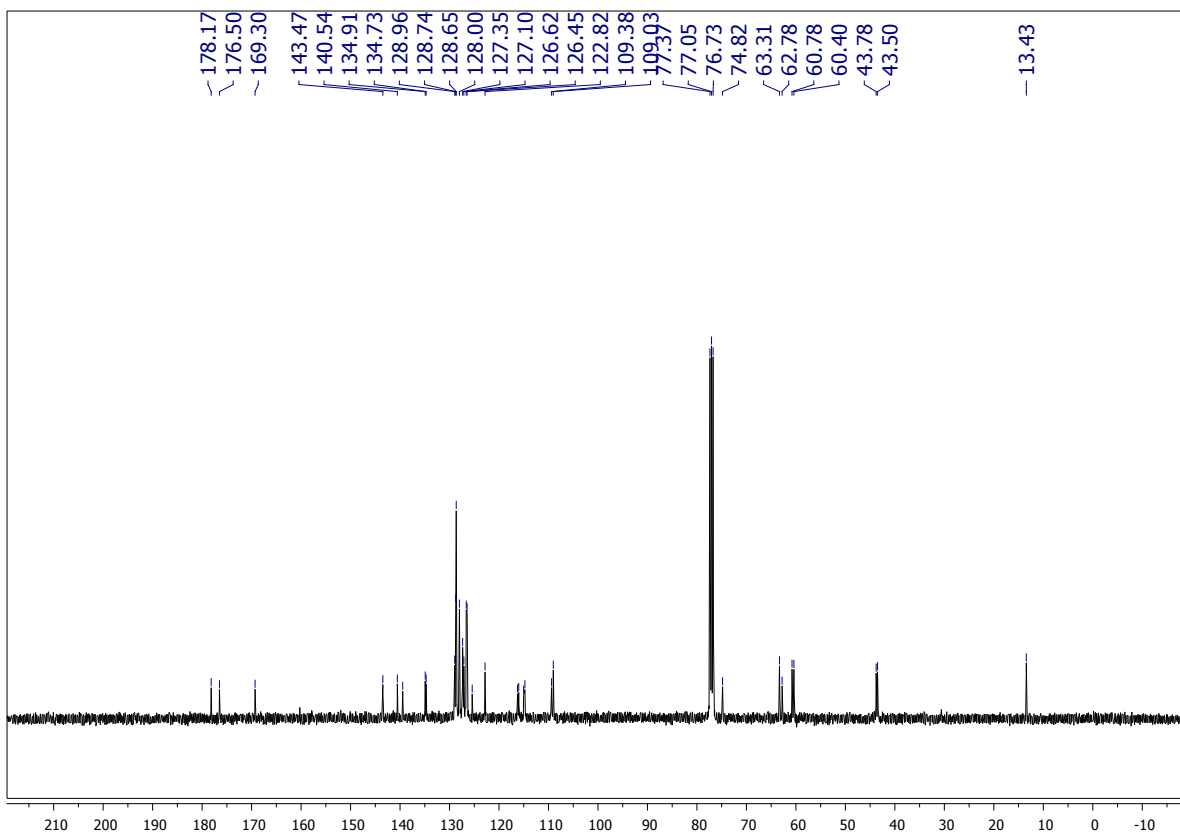

Figure 65.  $^{13}\text{C}$  NMR spectrum of compound **5f**

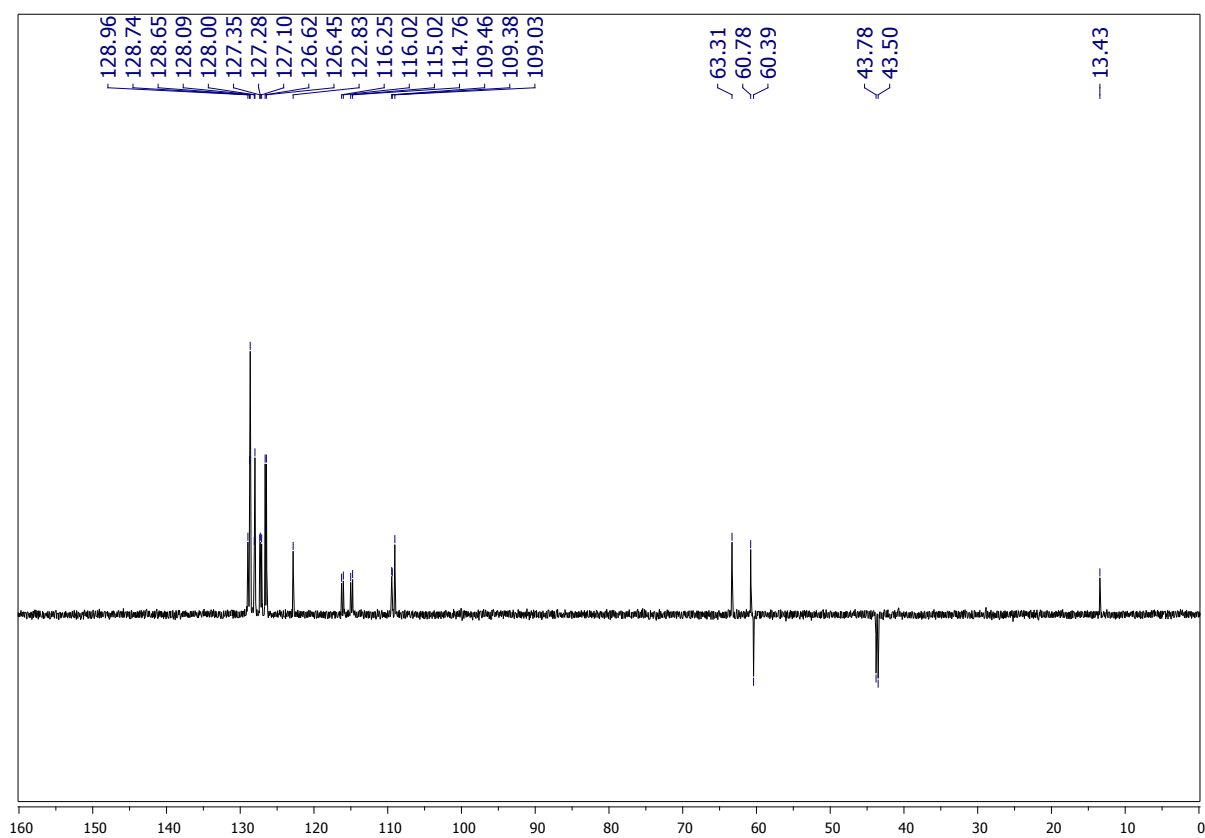

Figure 66. DEPT-135 spectrum of compound **5f**

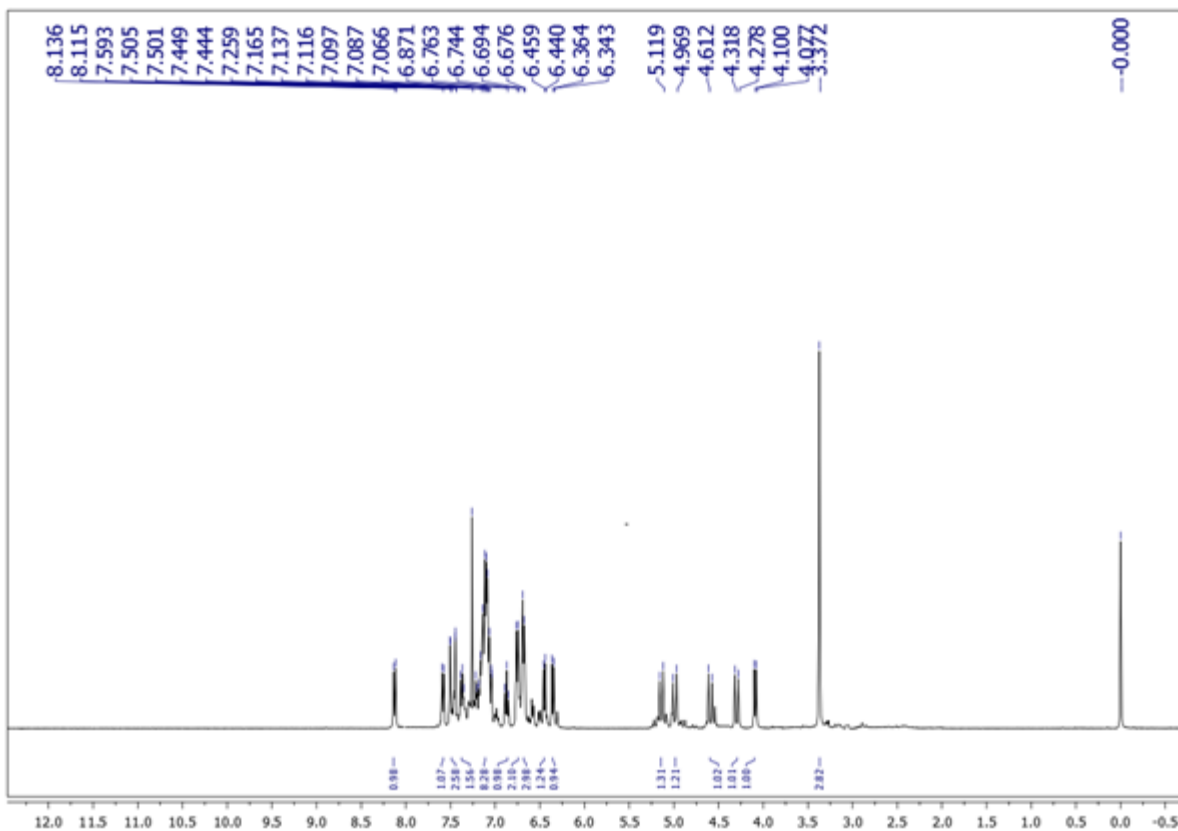

Figure 67.  $^1\text{H}$  NMR spectrum of compound **5g**

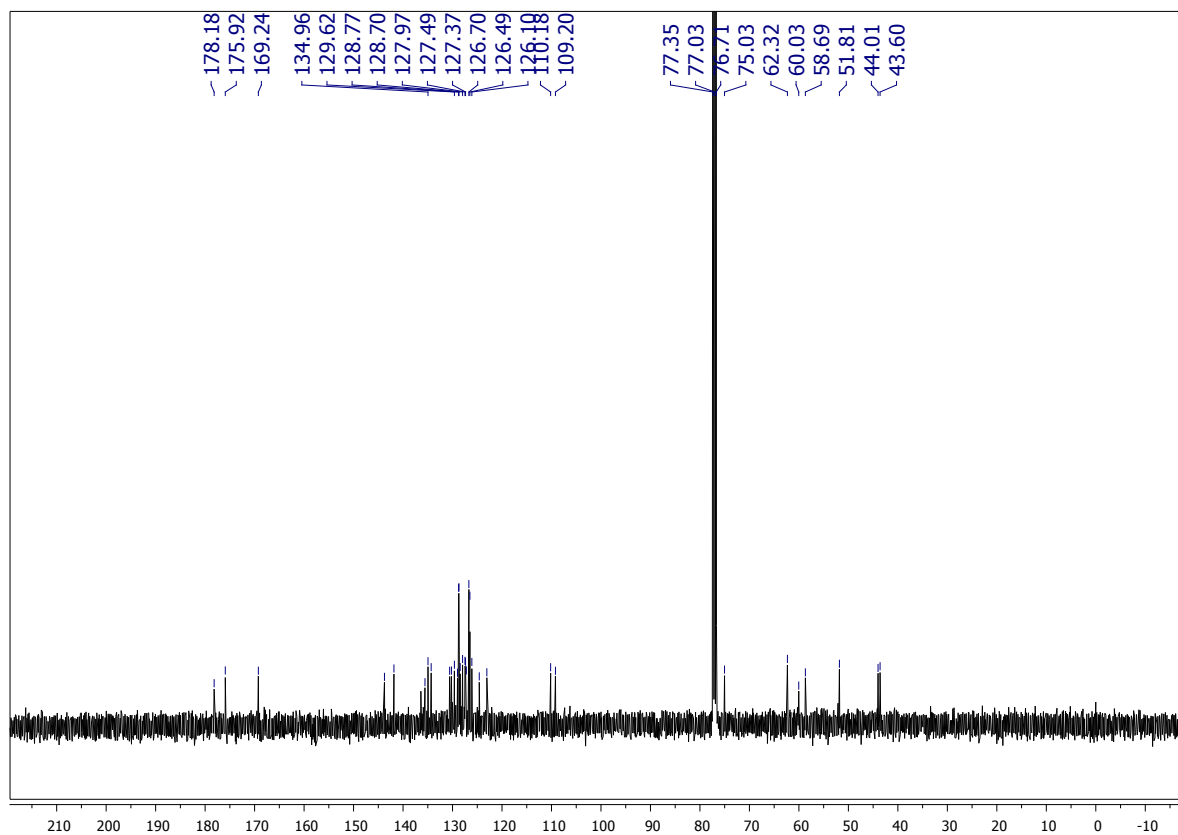

Figure 68.  $^{13}\text{C}$  NMR spectrum of compound **5g**

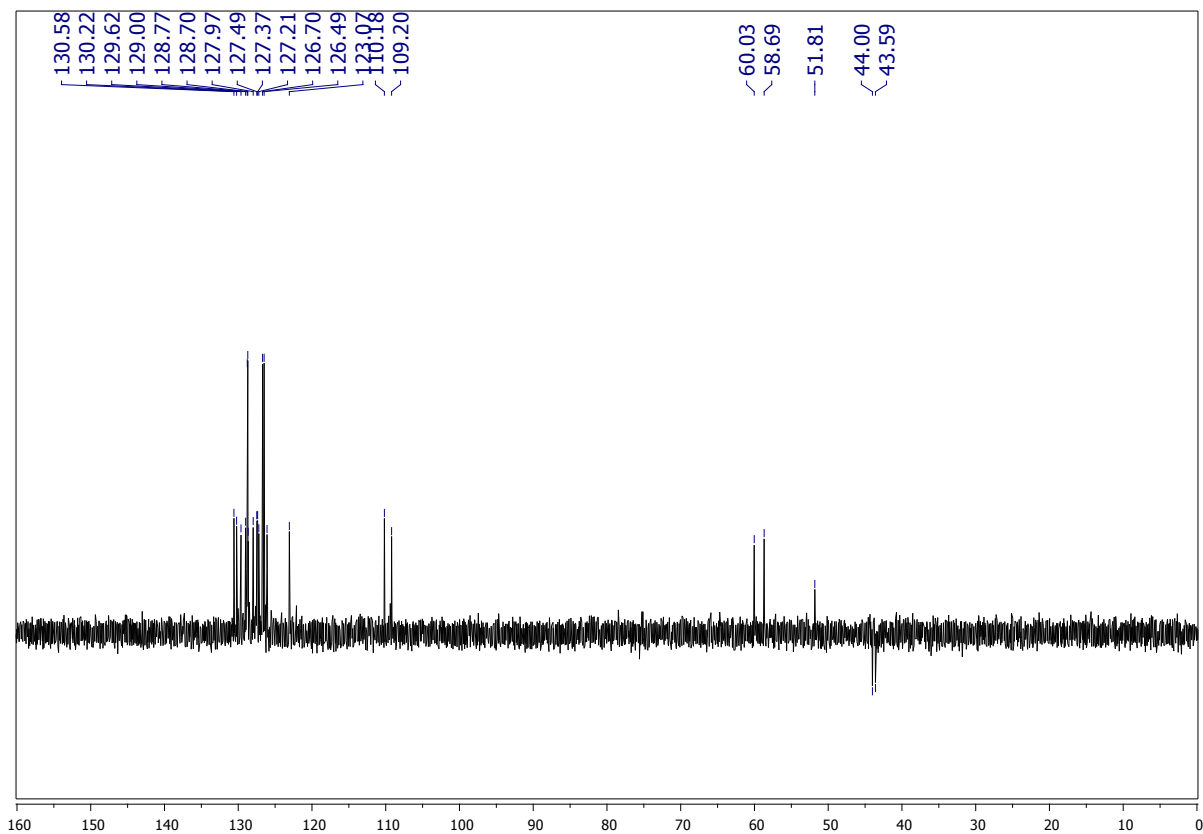

Figure 69. DEPT-135 spectrum of compound 5g

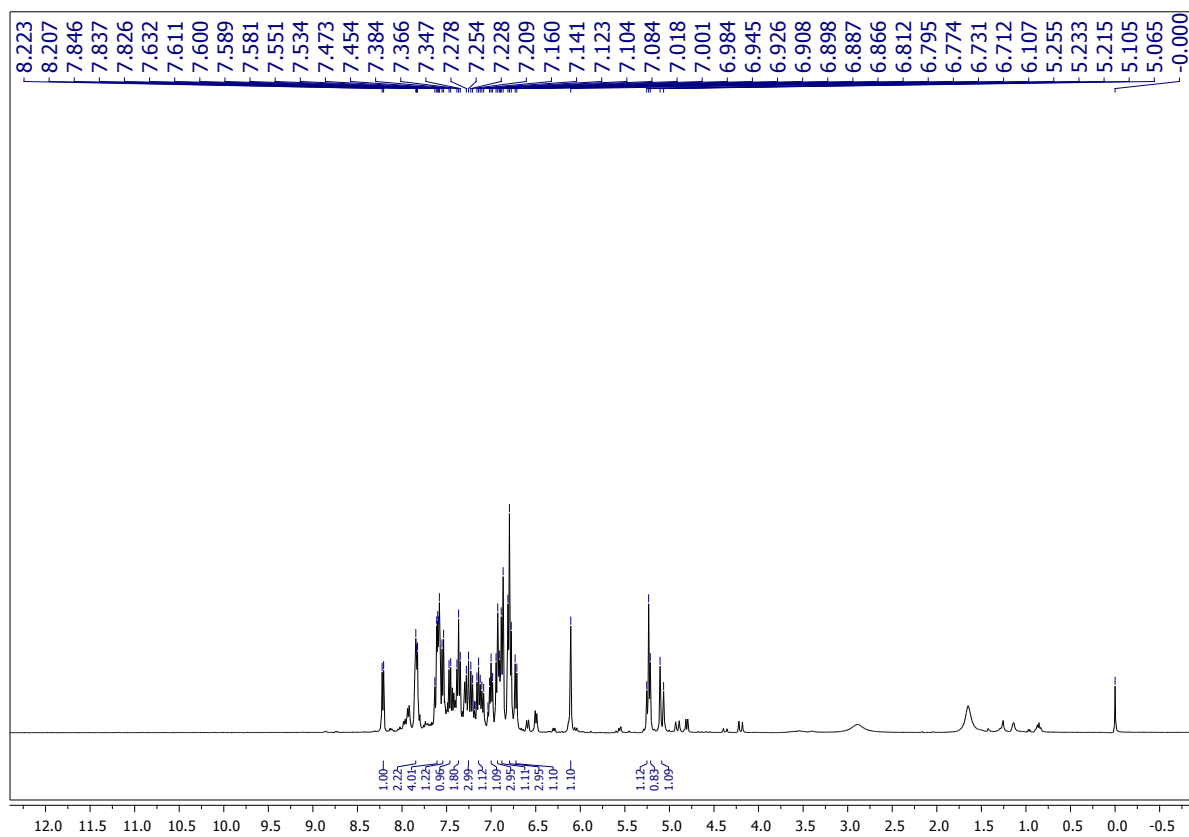

Figure 70. <sup>1</sup>H NMR spectrum of compound 7a

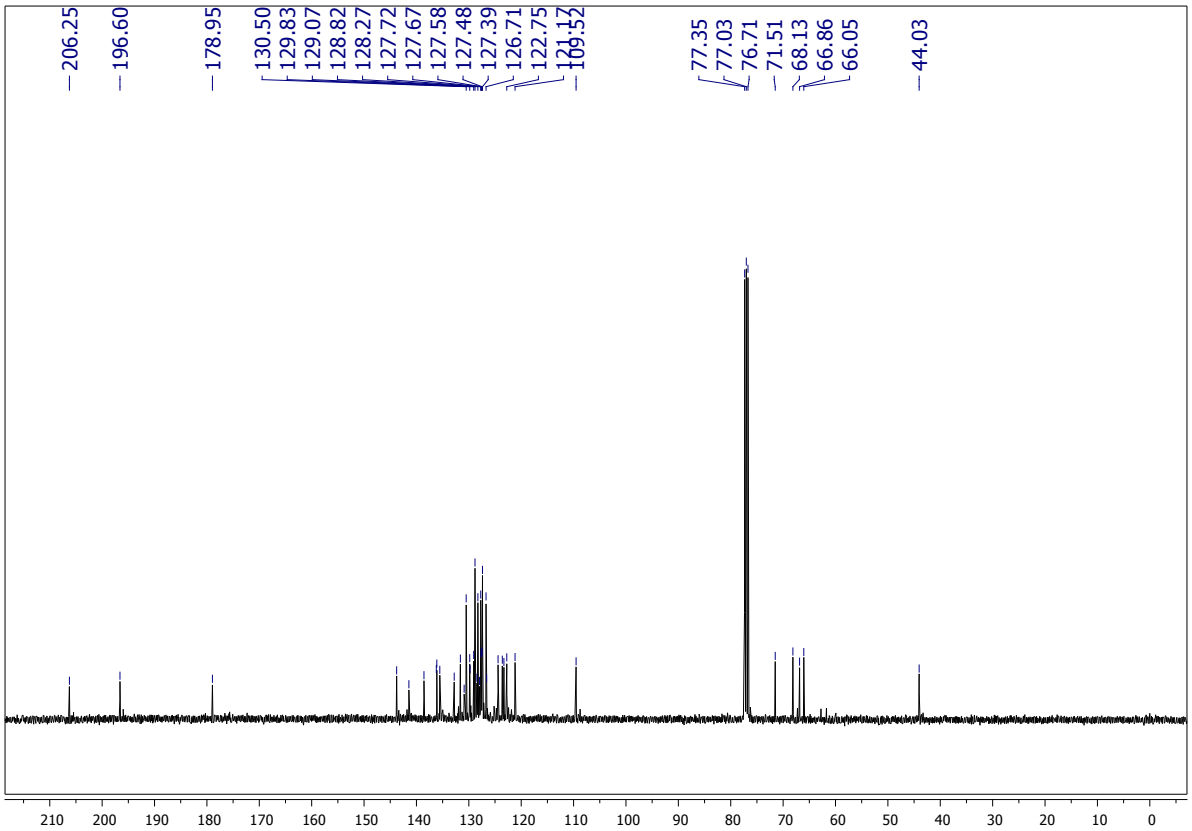

Figure 71.  $^{13}\text{C}$  NMR spectrum of compound 7a

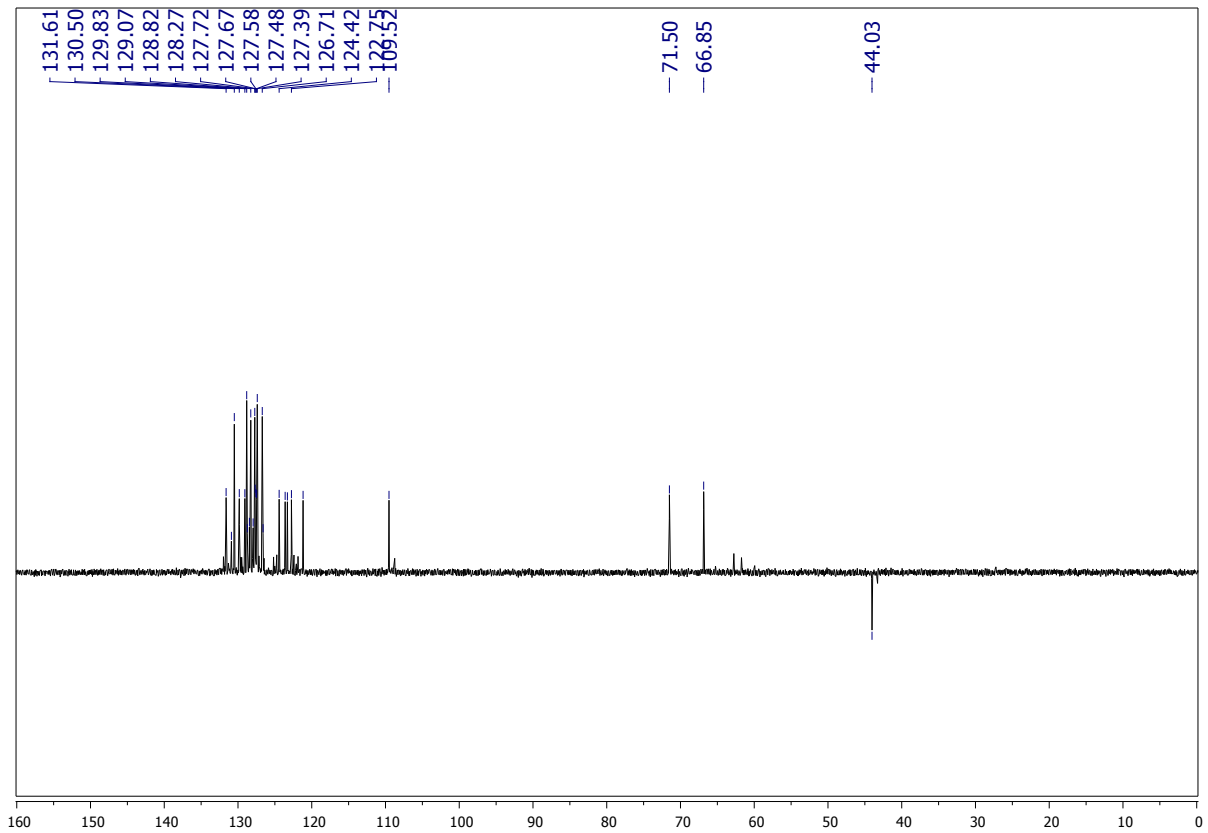

Figure 72. DEPT-135 spectrum of compound 7a

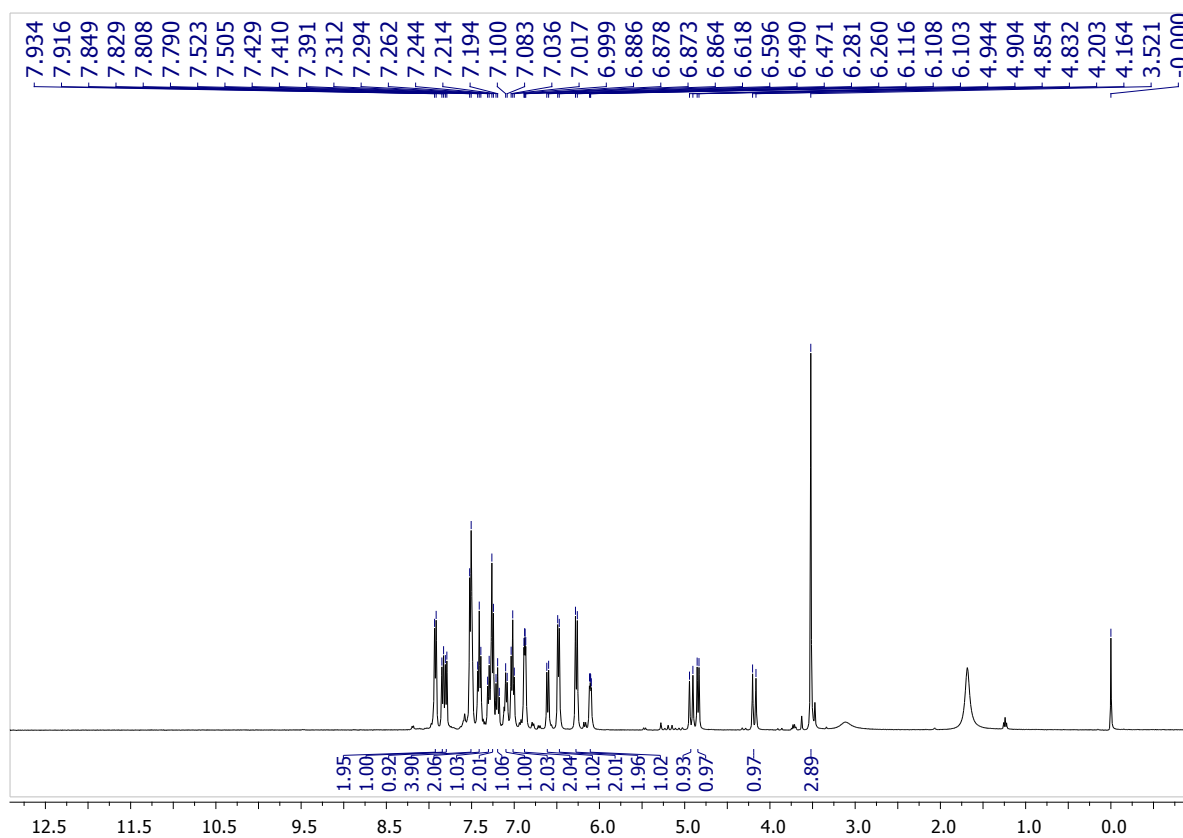

Figure 73.  $^1\text{H}$  NMR spectrum of compound **7b**

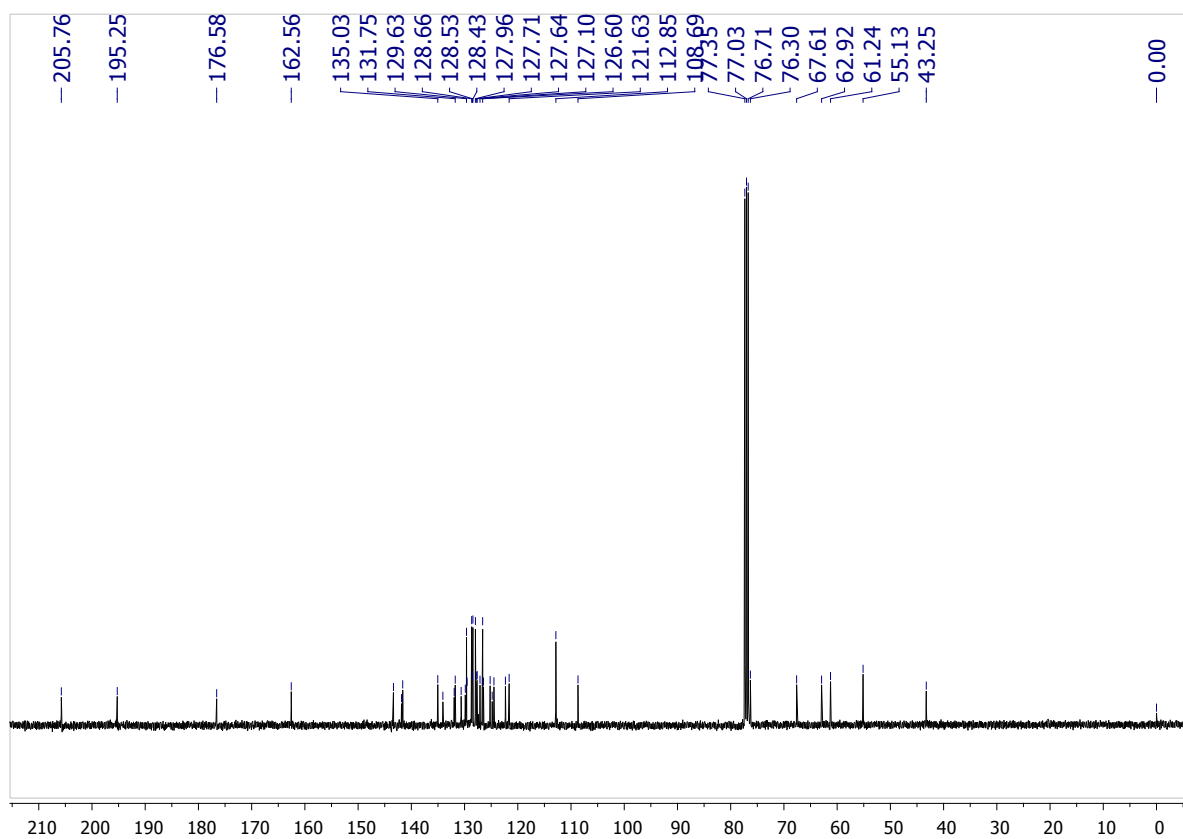

Figure 74.  $^{13}\text{C}$  NMR spectrum of compound **7b**

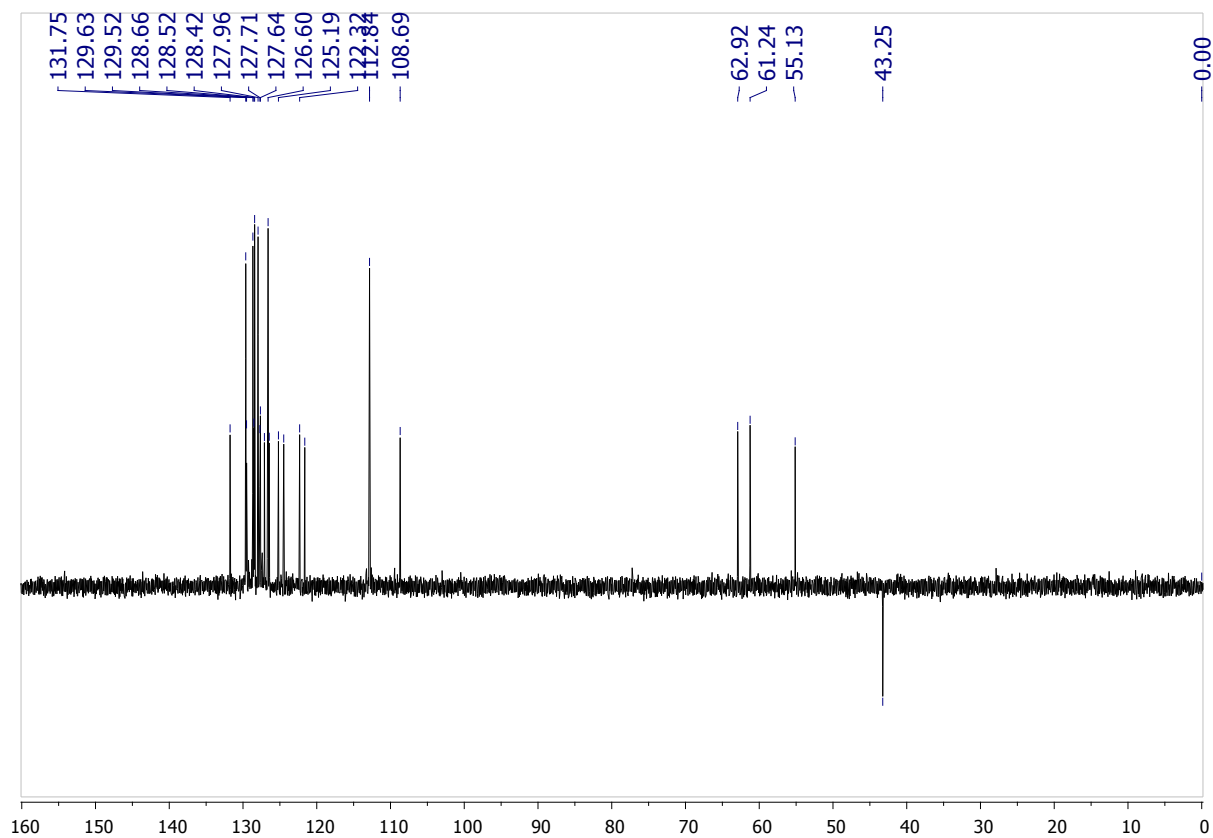

Figure 75. DEPT-135 spectrum of compound 7b

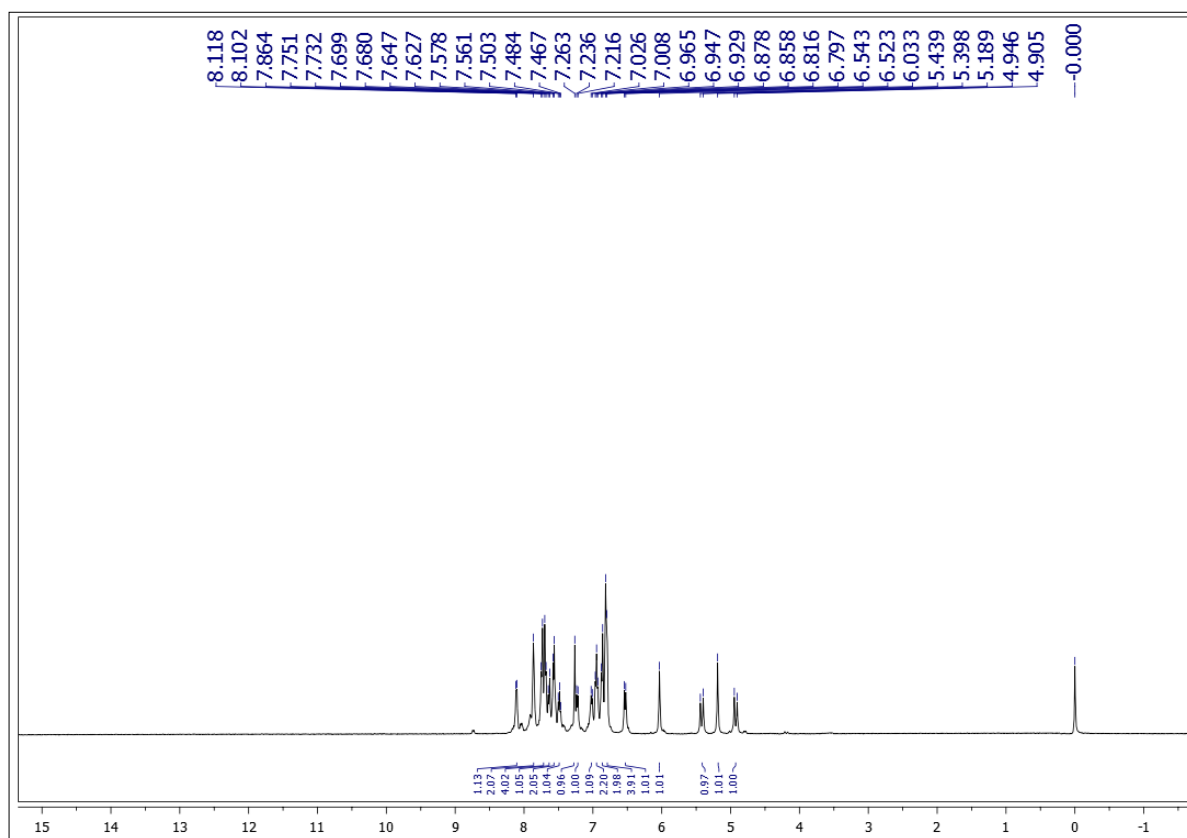

Figure 76. <sup>1</sup>H NMR spectrum of compound 7c

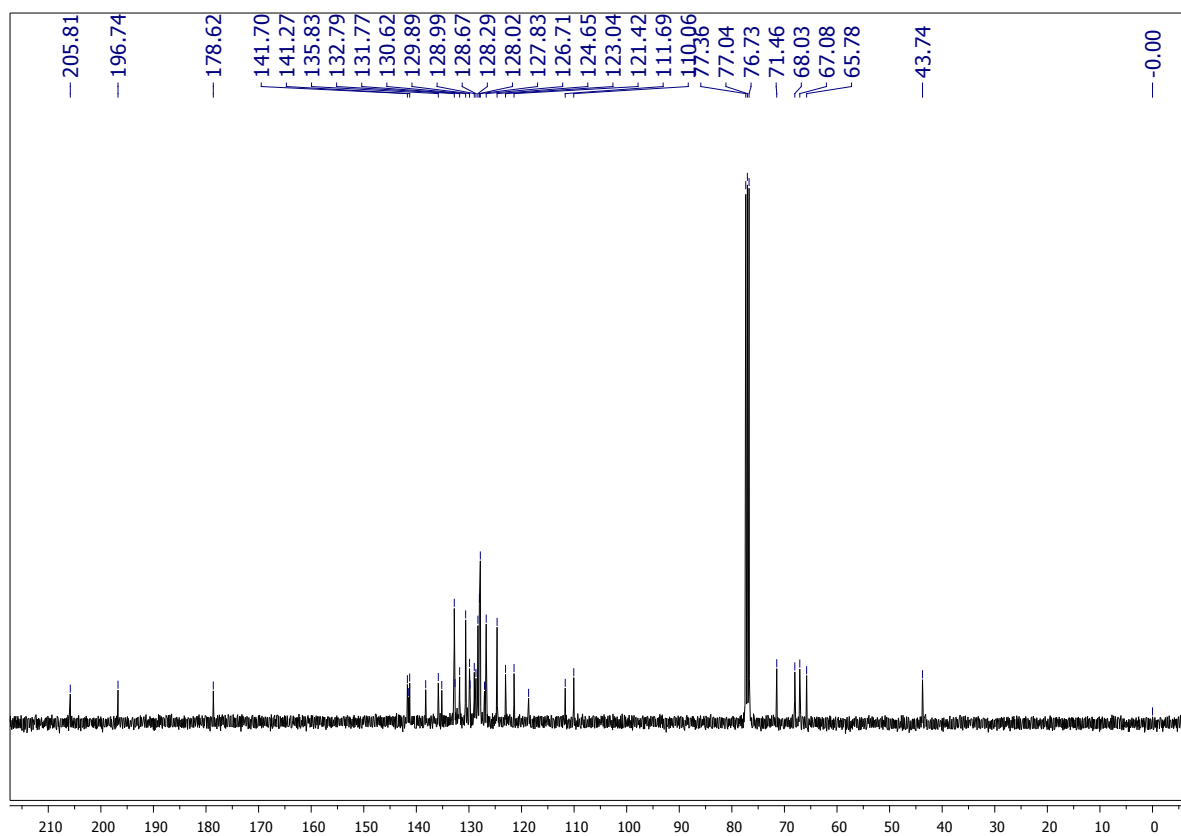

Figure 77.  $^{13}\text{C}$  NMR spectrum of compound **7c**

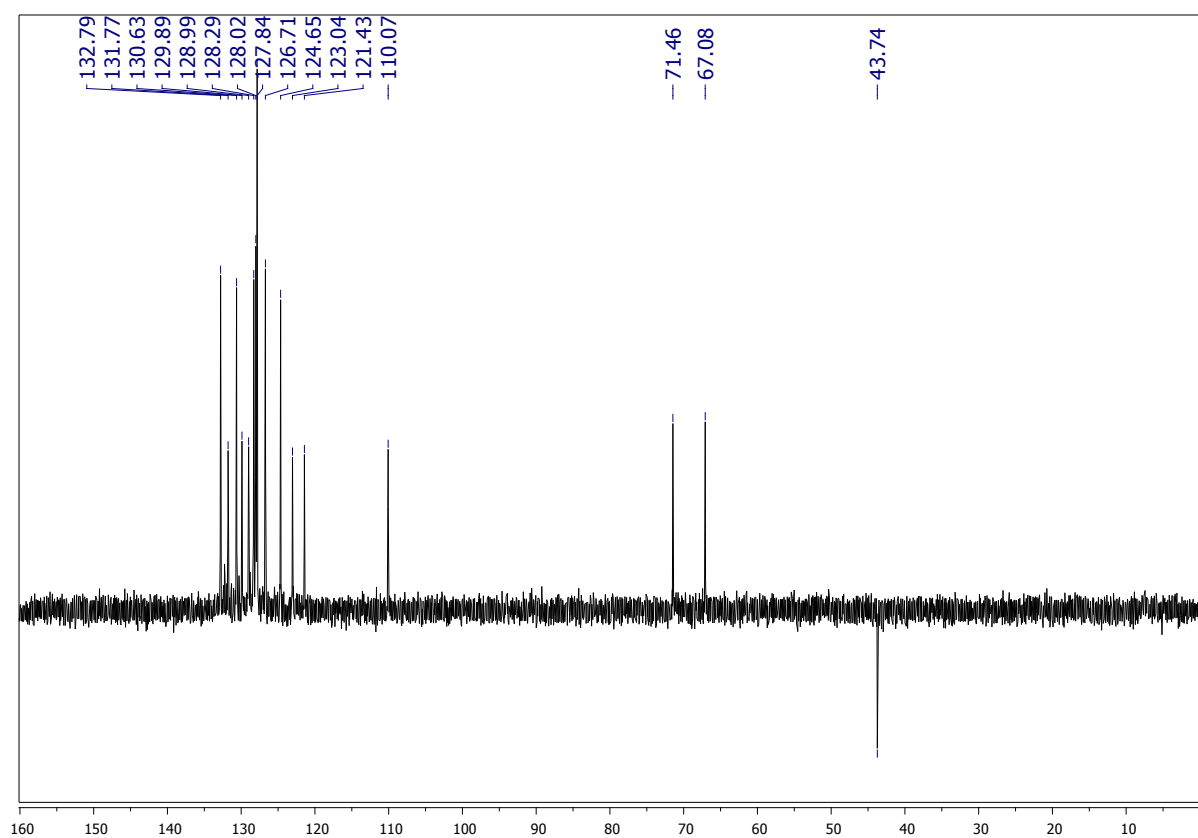

Figure 78. DEPT-135 spectrum of compound **7c**



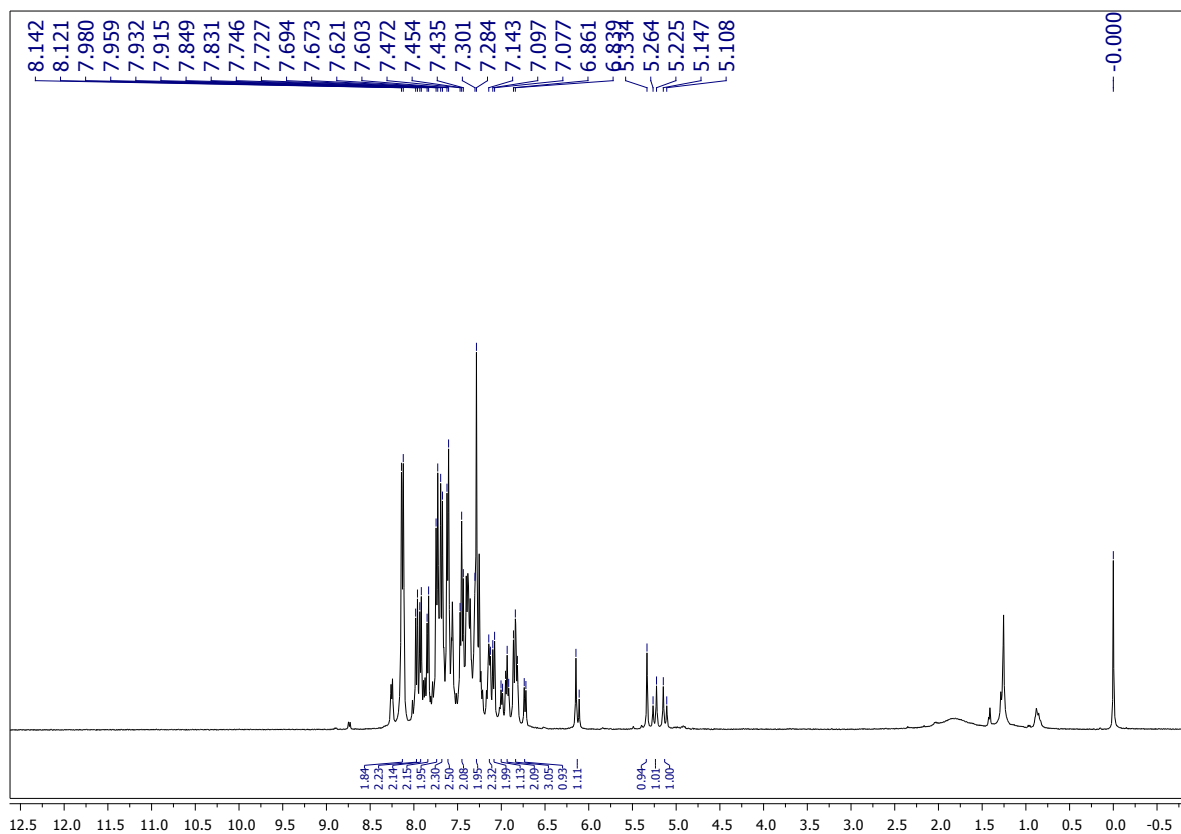

Figure 79.  $^1\text{H}$  NMR spectrum of compound **7d**

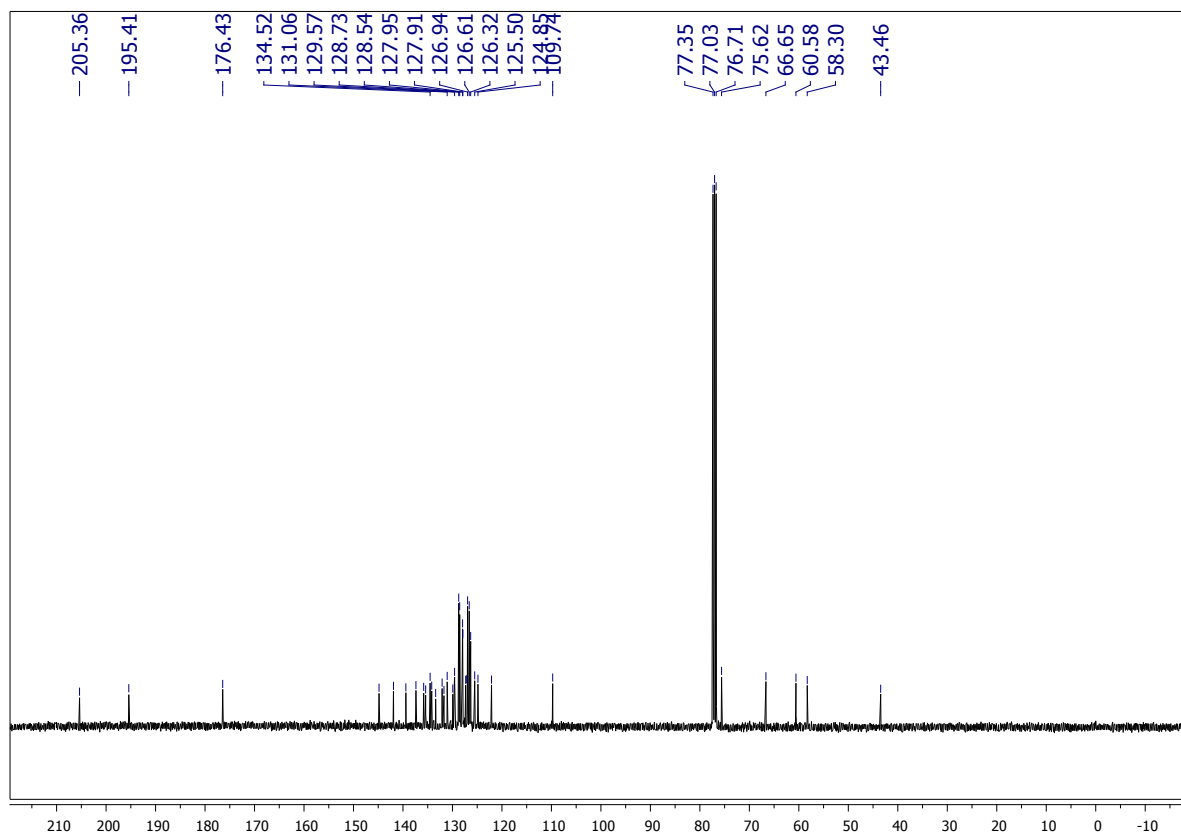

Figure 80.  $^{13}\text{C}$  NMR spectrum of compound **7d**

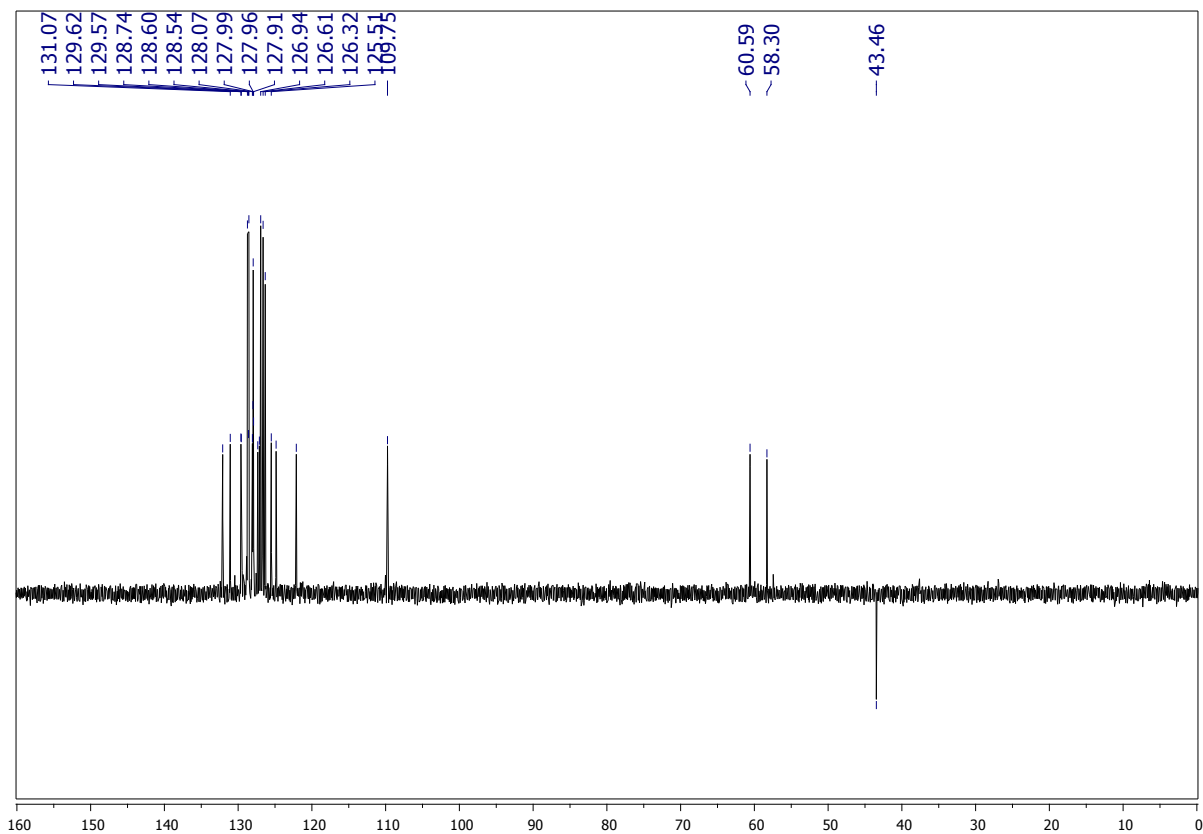

Figure 81. DEPT-135 spectrum of compound 7d

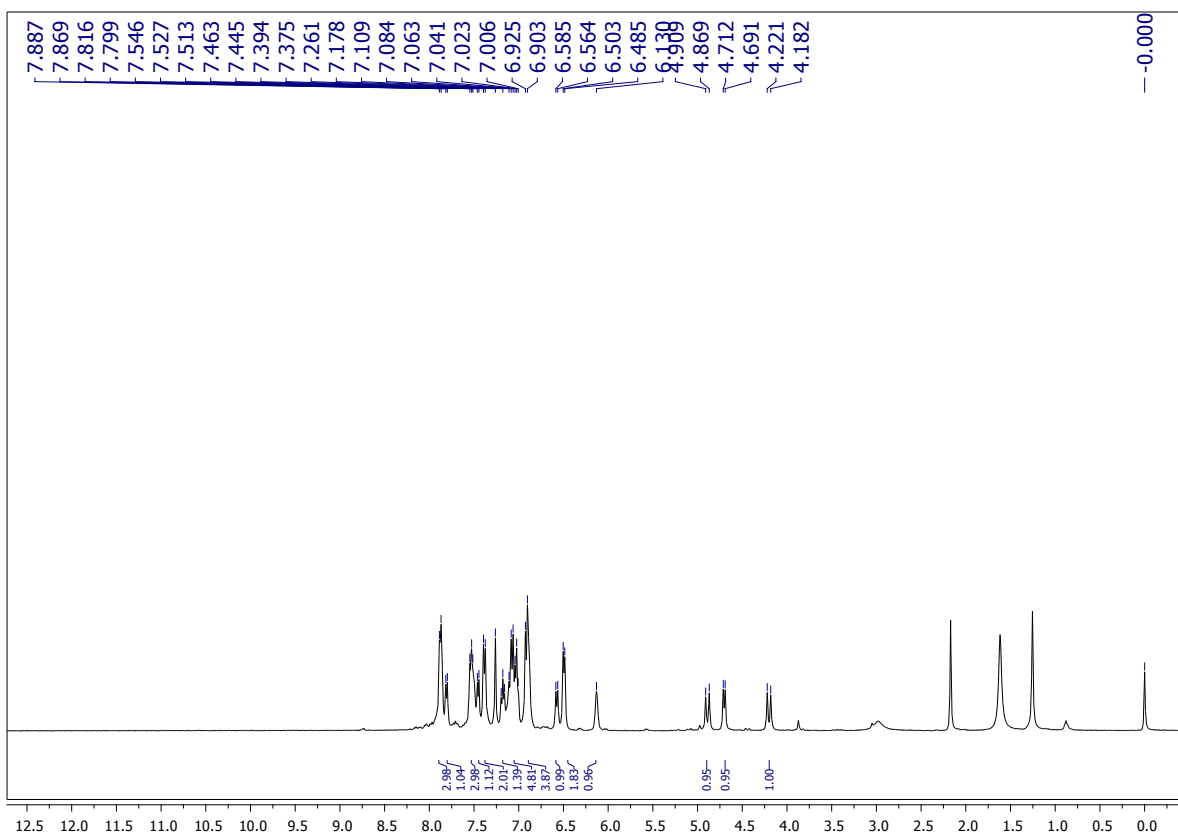

Figure 82. <sup>1</sup>H NMR spectrum of compound 7e

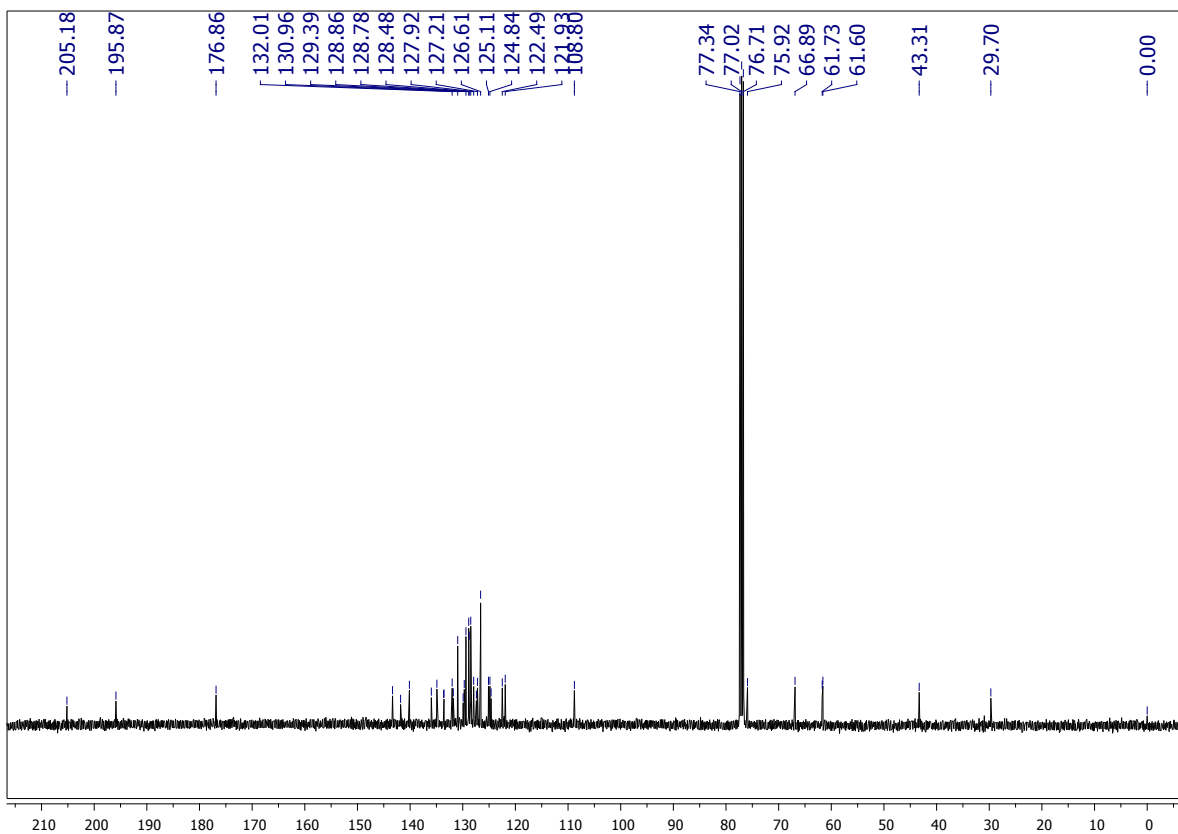

Figure 83.  $^{13}\text{C}$  NMR spectrum of compound **7e**

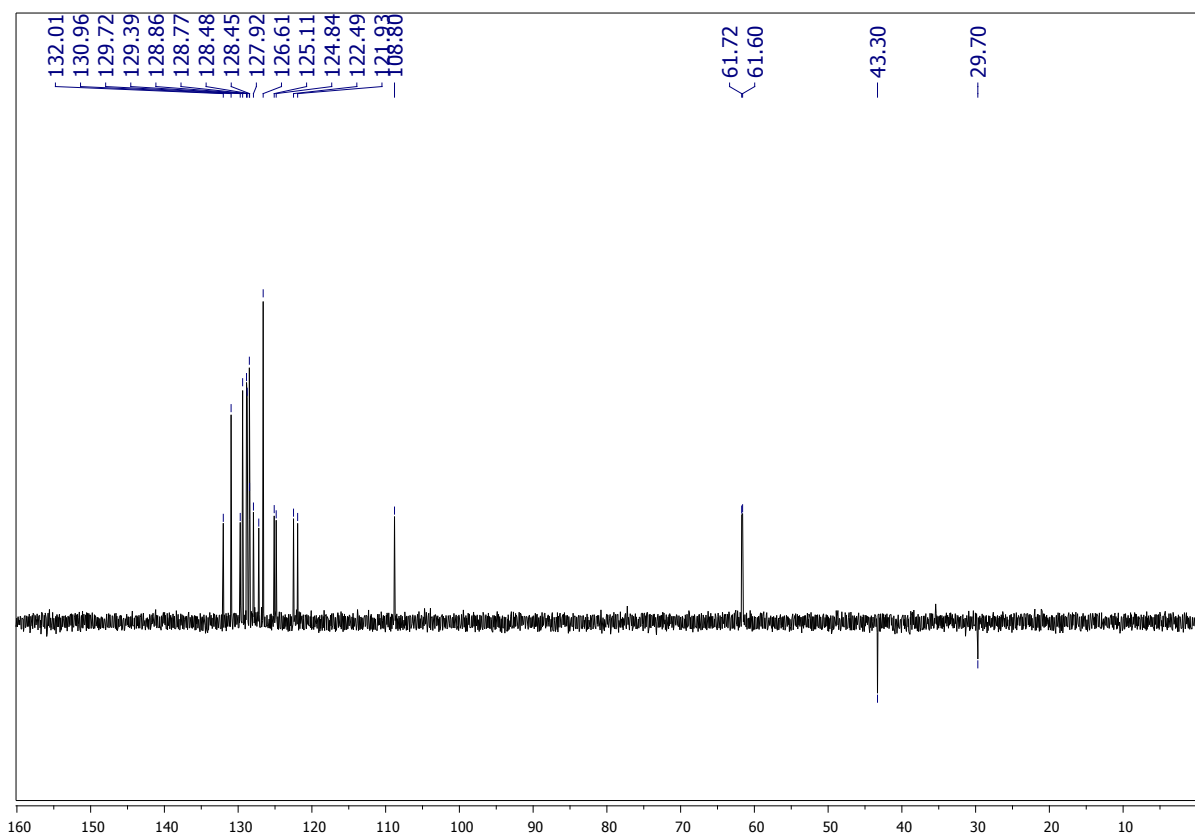

Figure 84. DEPT-135 spectrum of compound **7e**

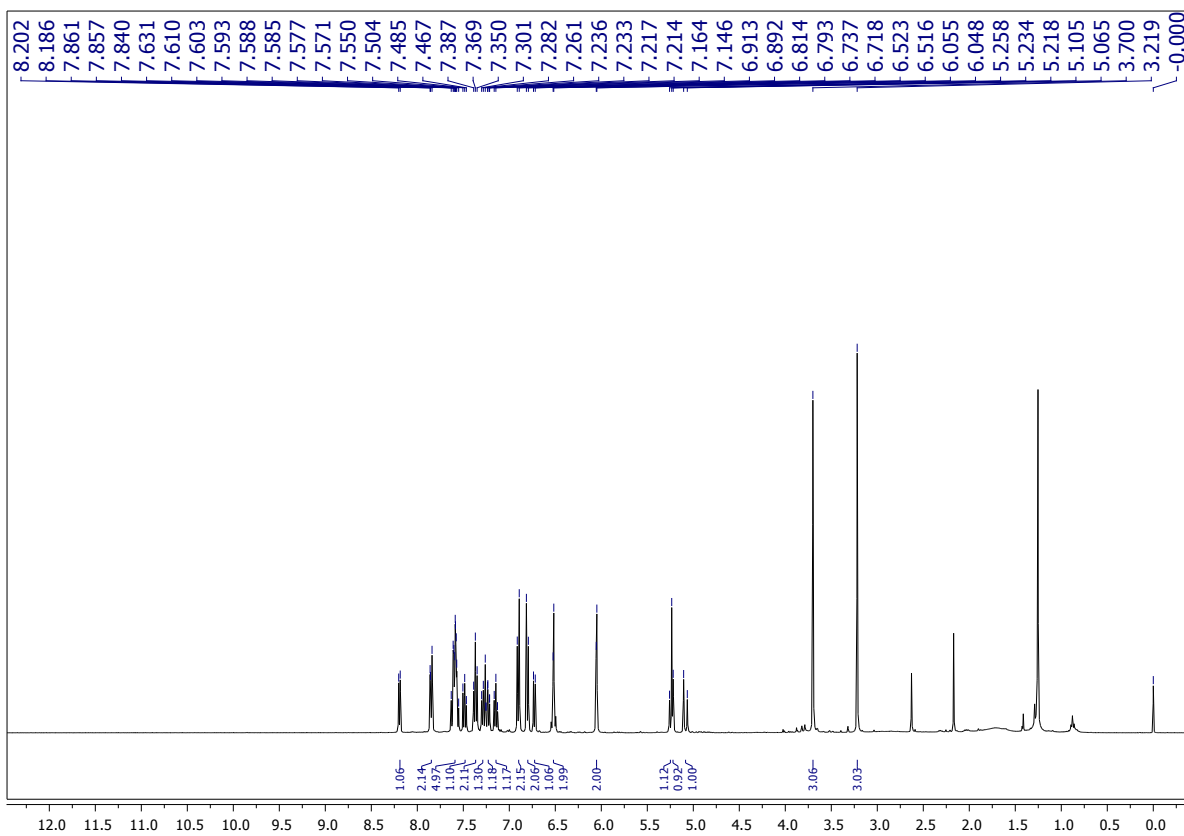

Figure 85.  $^1\text{H}$  NMR spectrum of compound **7f**

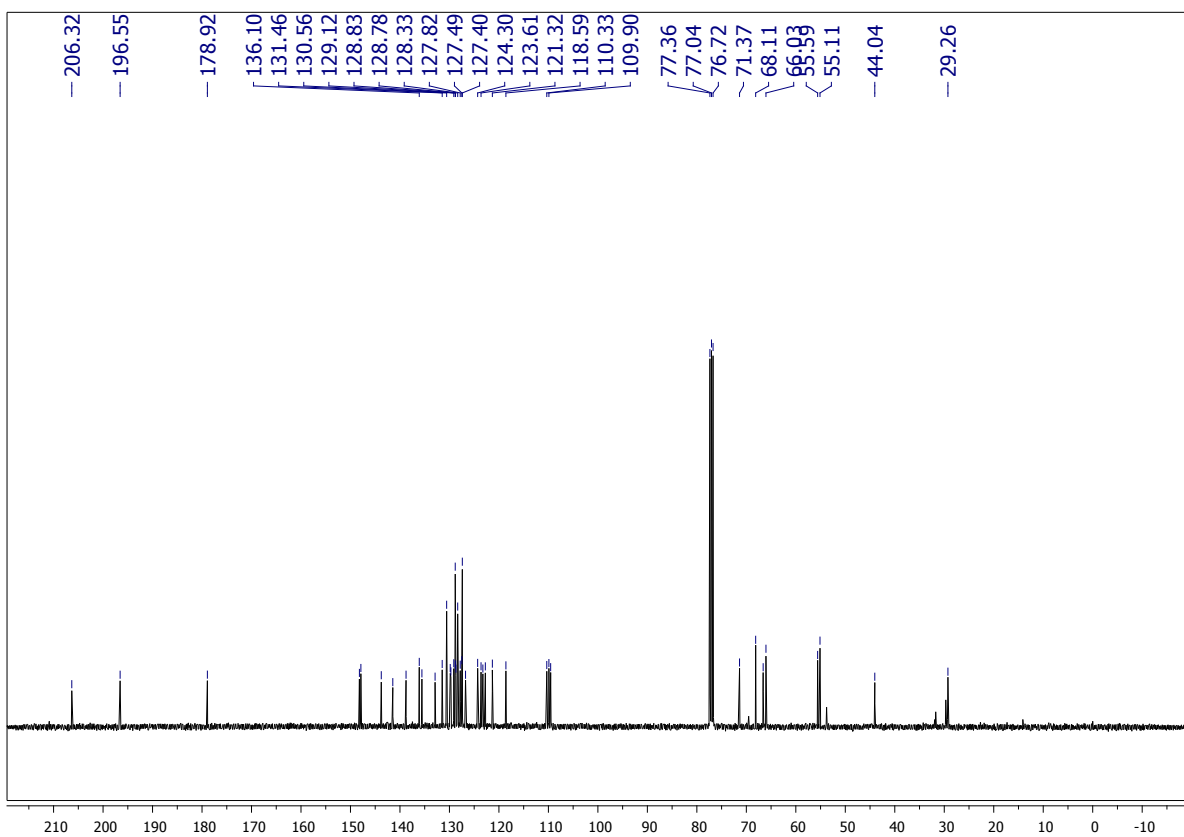

Figure 86.  $^{13}\text{C}$  NMR spectrum of compound **7f**

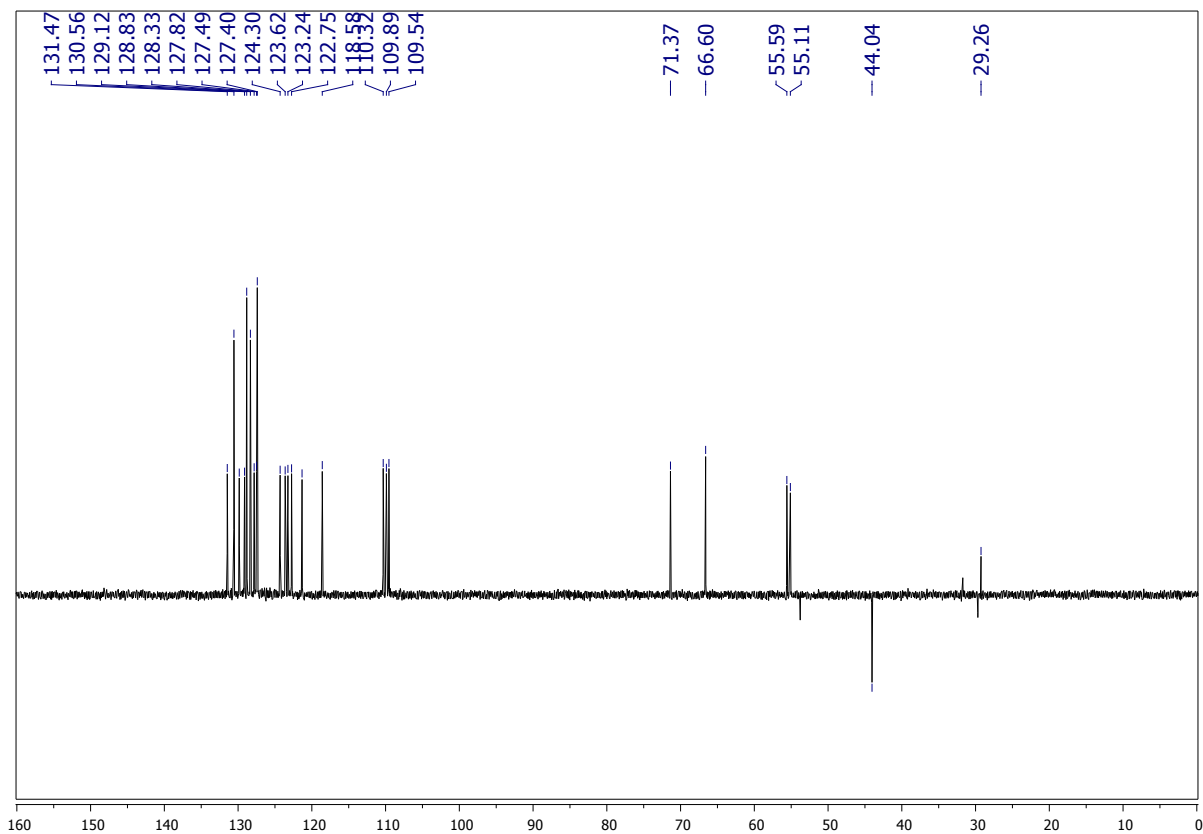

Figure 87. DEPT-135 spectrum of compound 7f

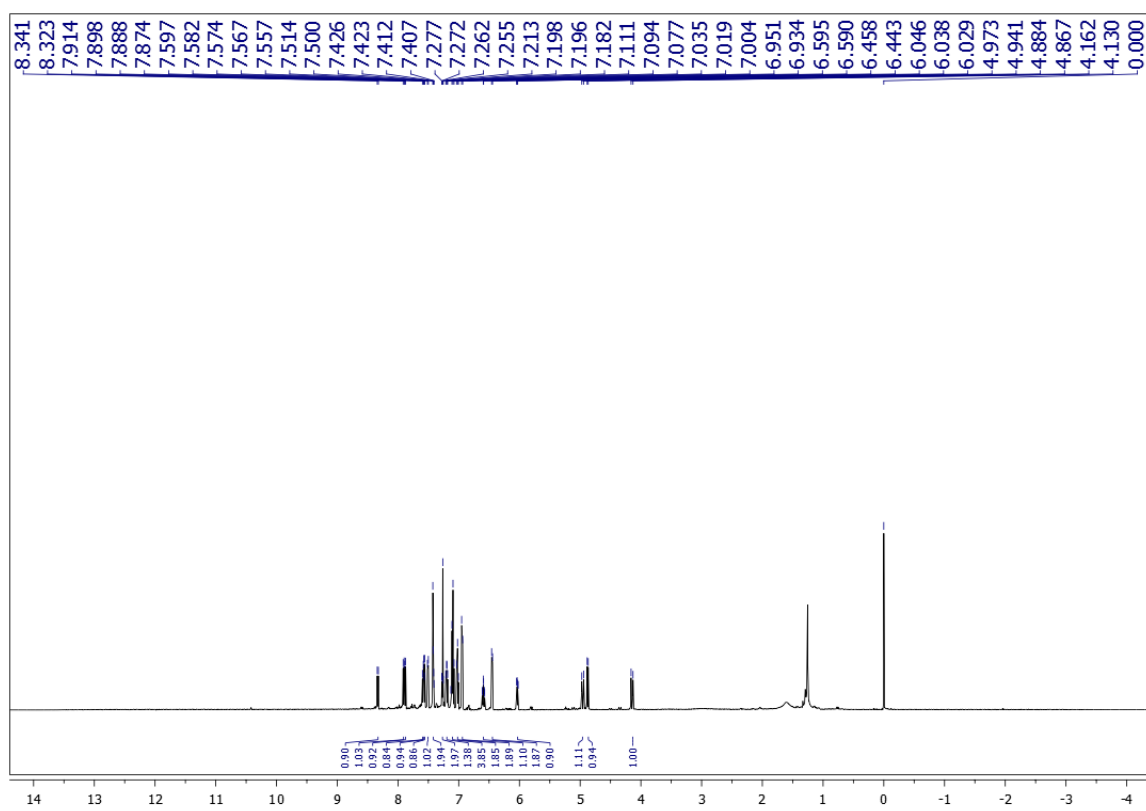

Figure 88. <sup>1</sup>H NMR spectrum of compound 7g

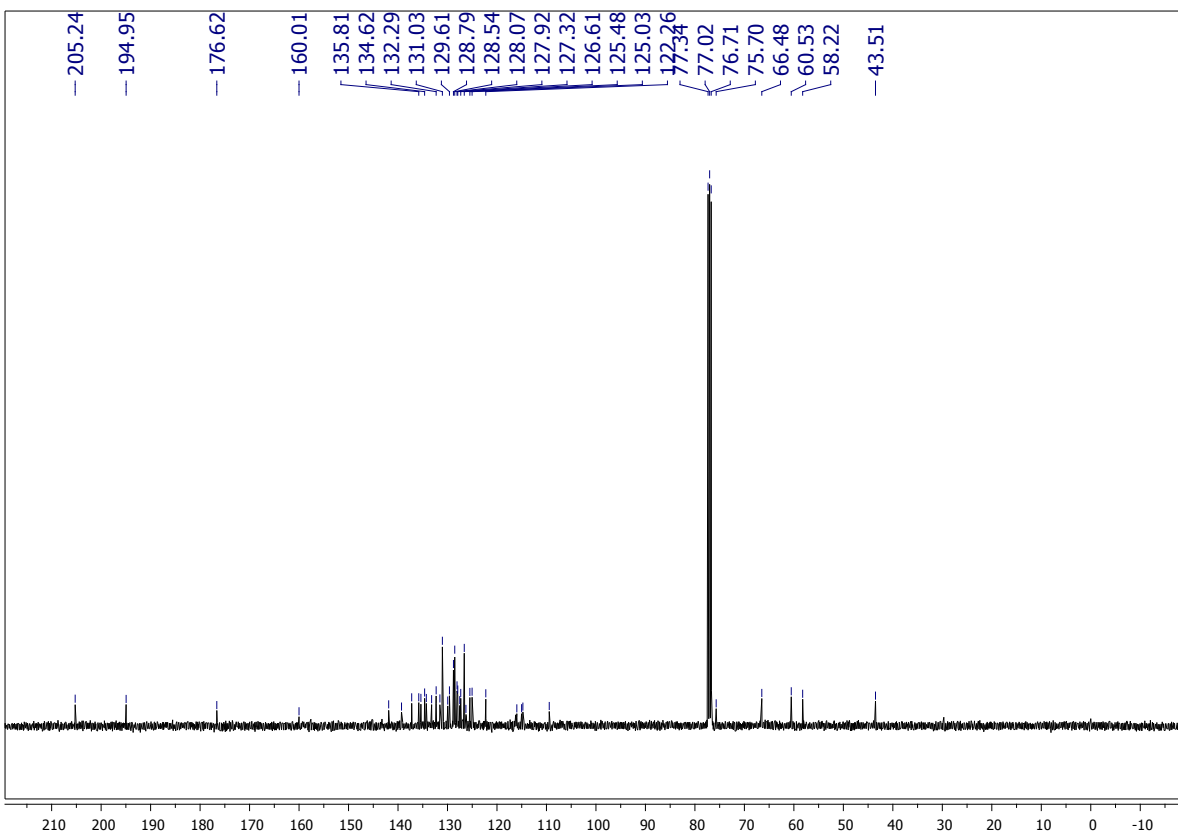

Figure 89.  $^{13}\text{C}$  NMR spectrum of compound **7g**

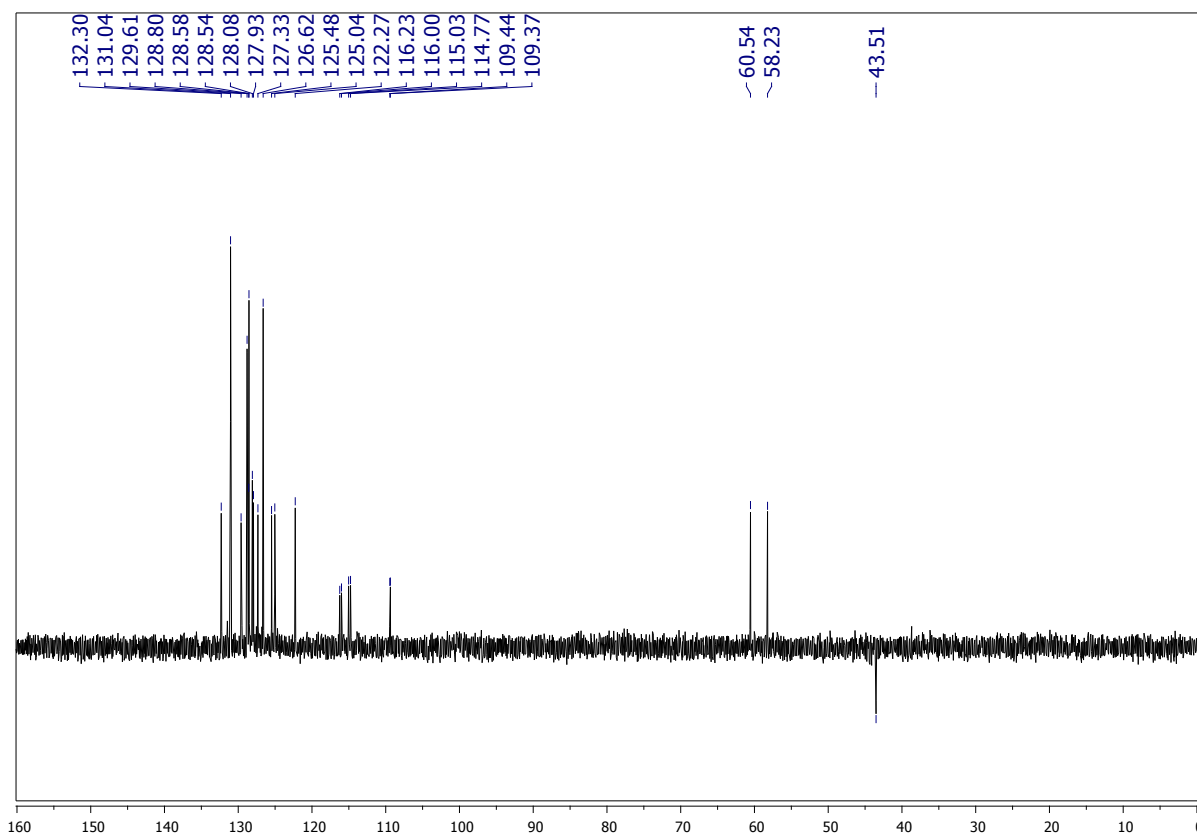

Figure 90. DEPT-135 spectrum of compound **7g**

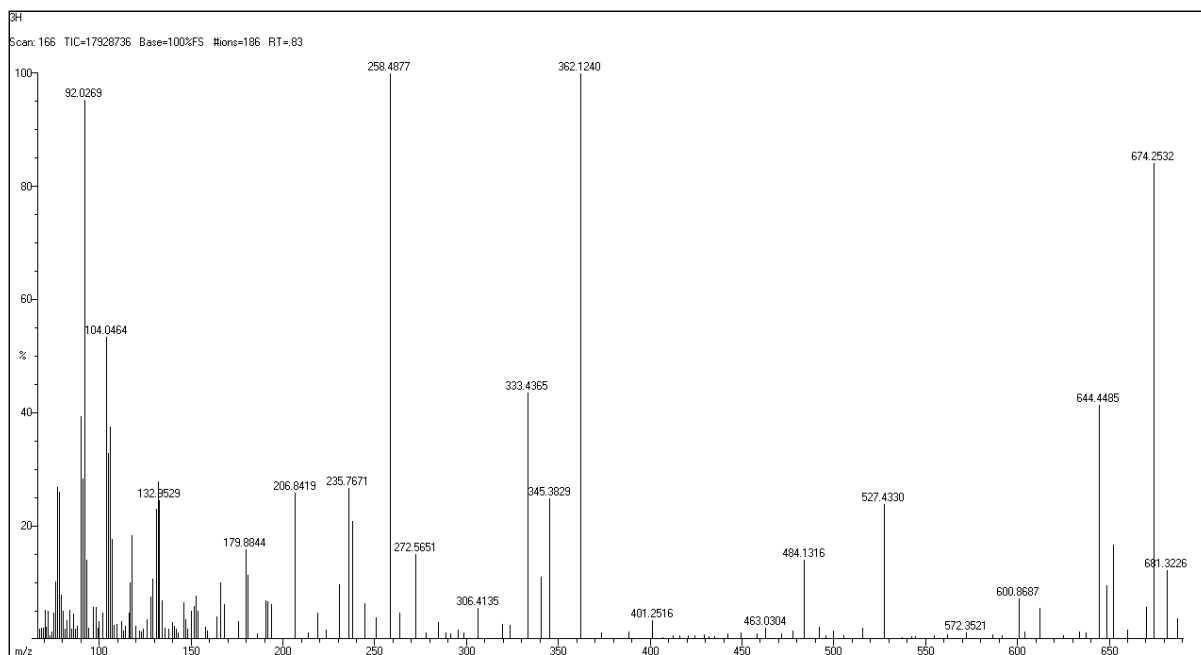

**Figure 91.** Mass spectrum of **3a**

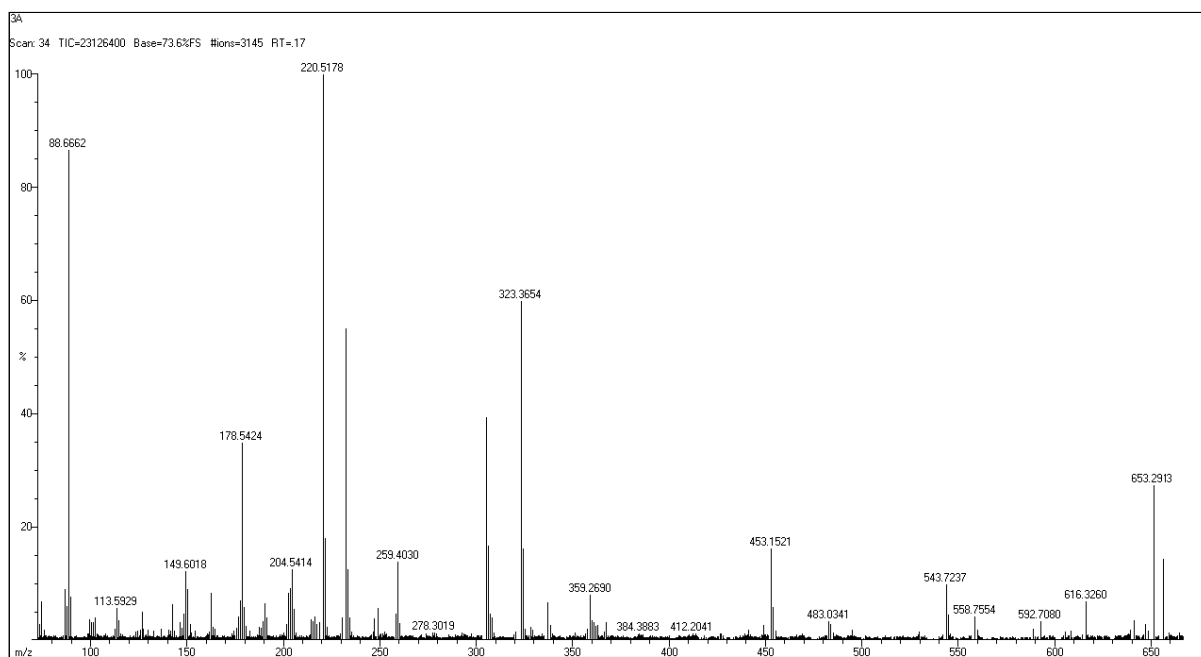

**Figure 92.** Mass spectrum of **3b**

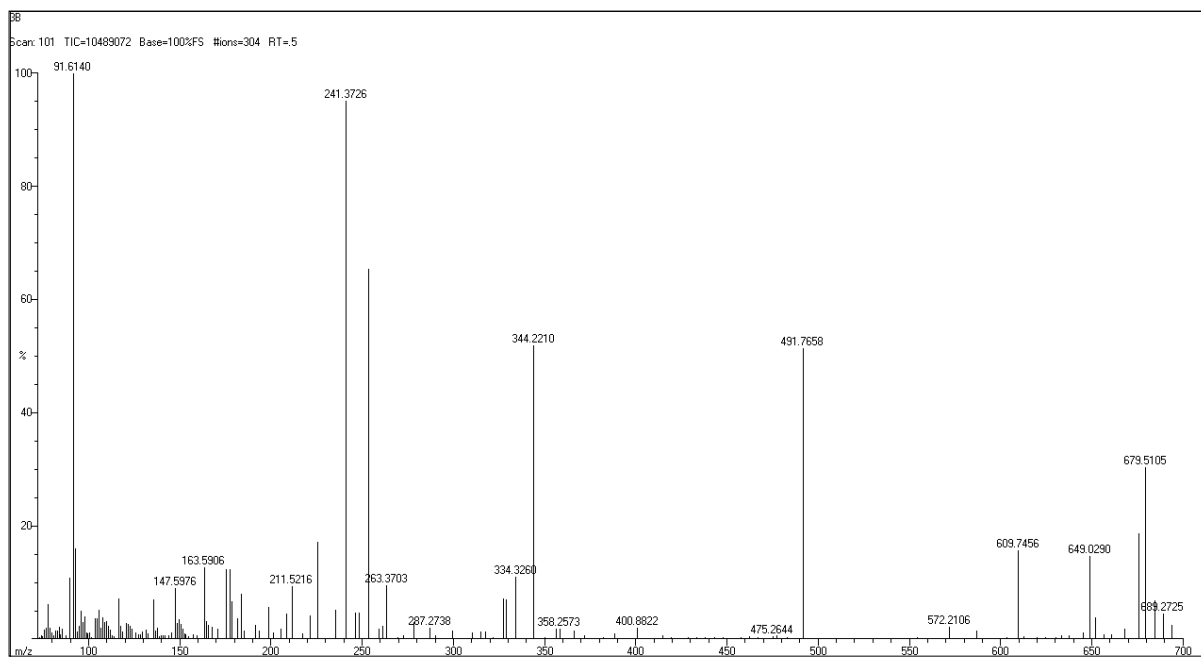

**Figure 93.** Mass spectrum of **3c**

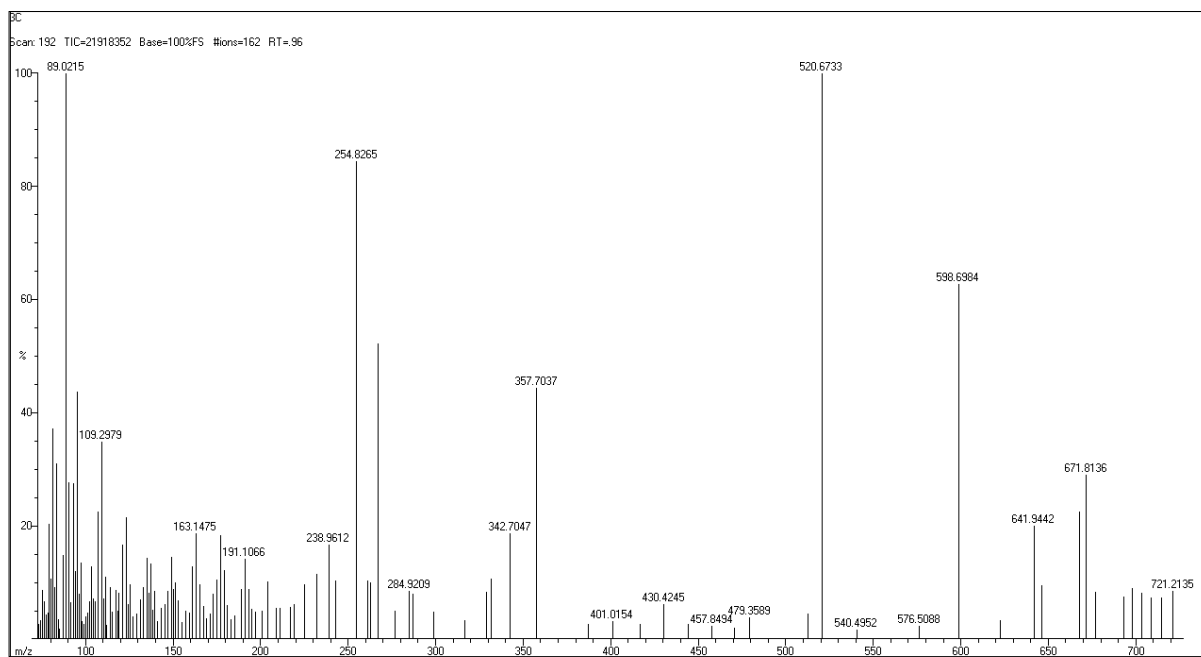

**Figure 94.** Mass spectrum of **3d**



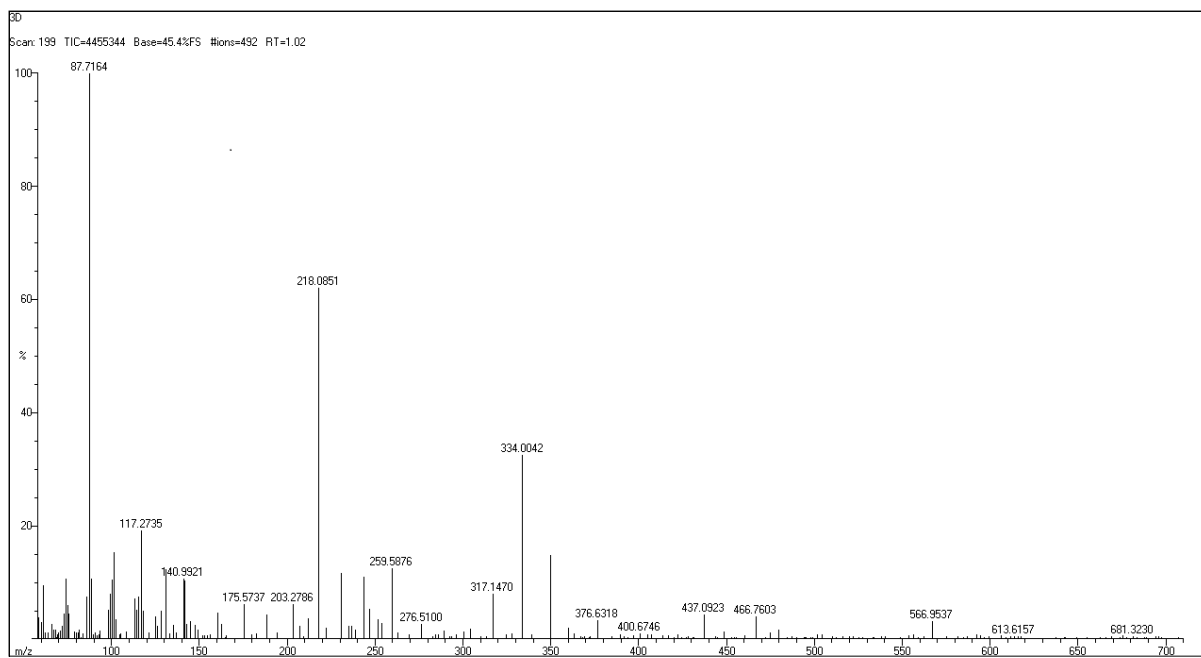

**Figure 95.** Mass spectrum of **3e**

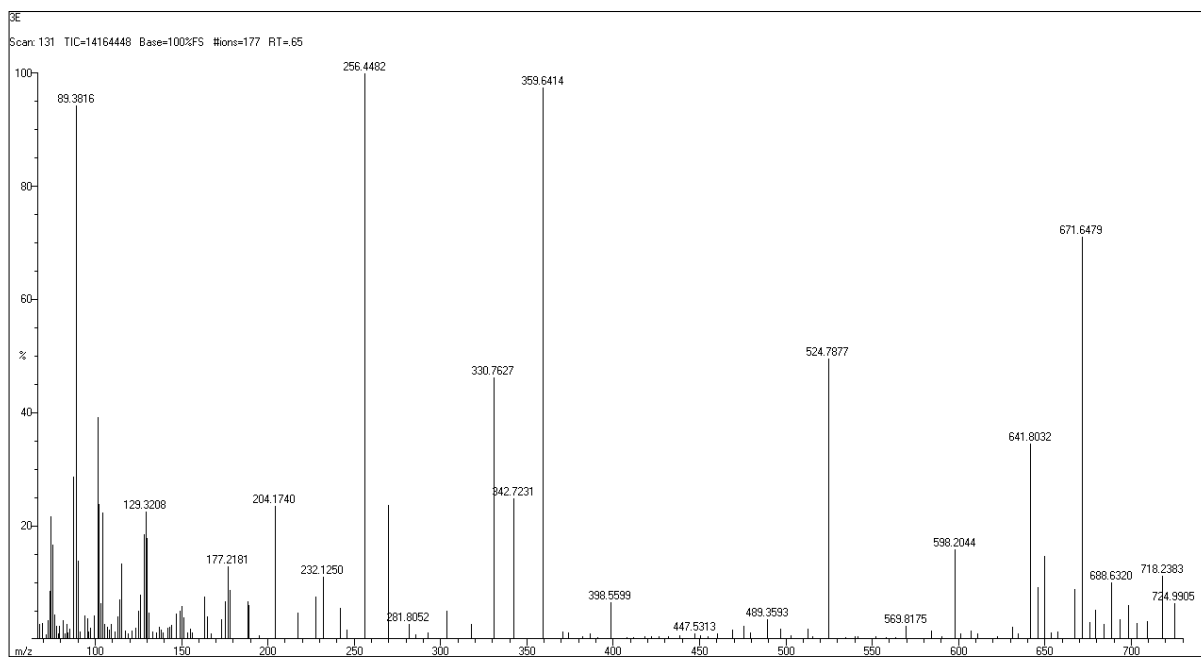

**Figure 96.** Mass spectrum of **3f**

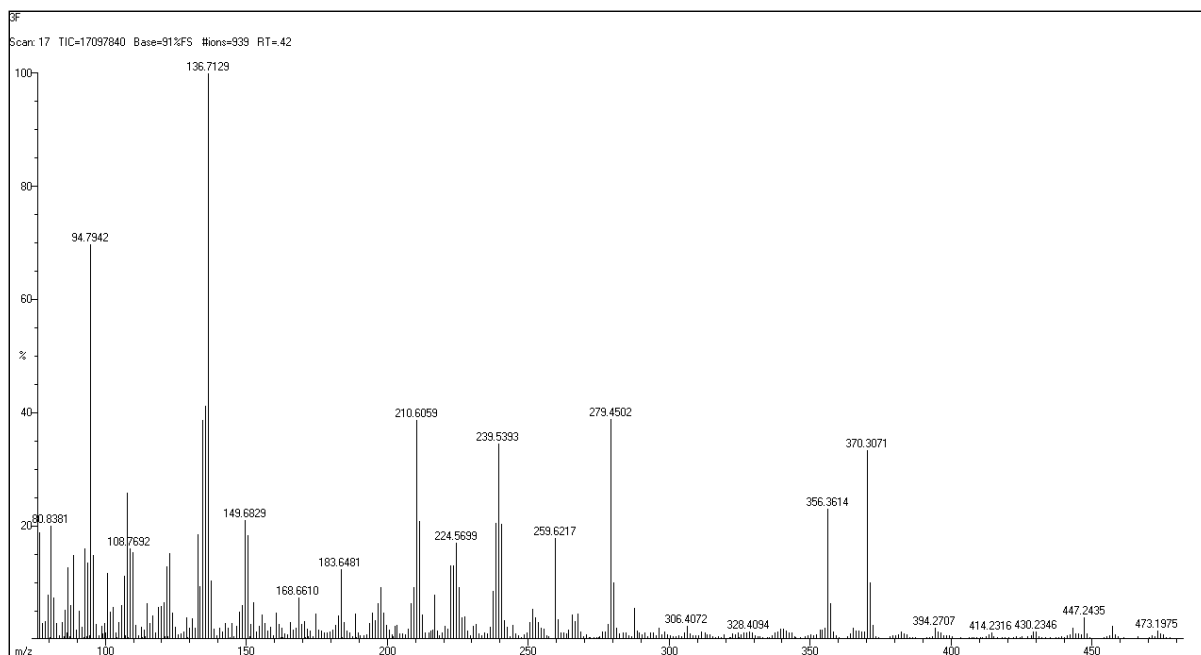

**Figure 97.** Mass spectrum of **3g**

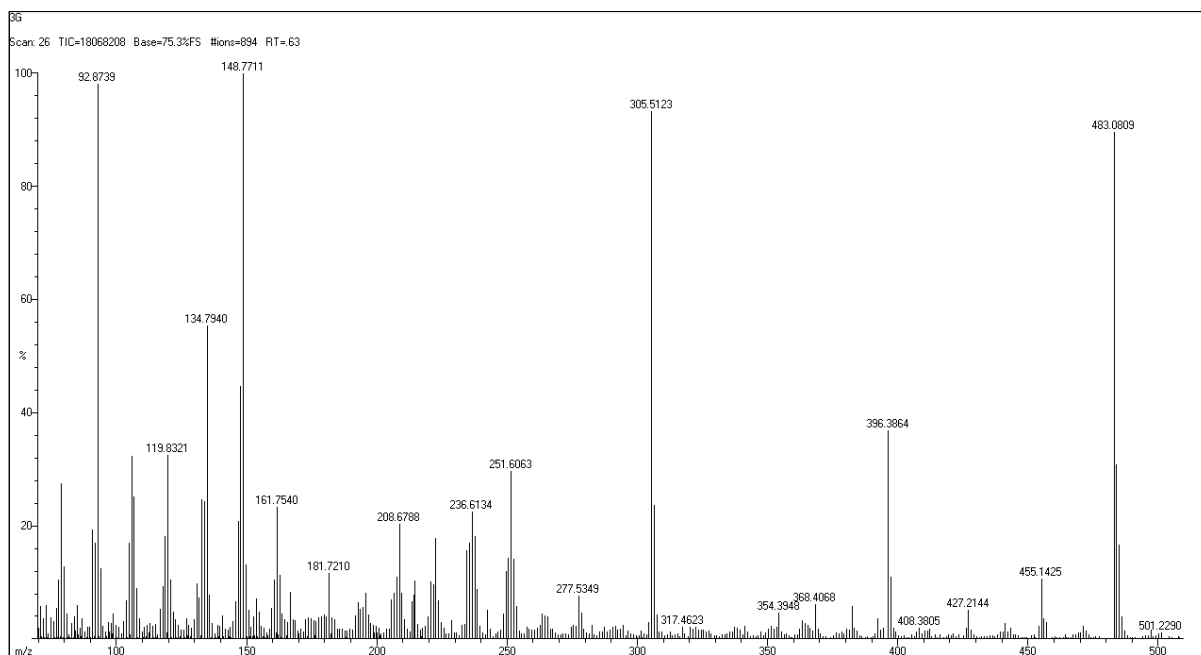

**Figure 98.** Mass spectrum of **3h**

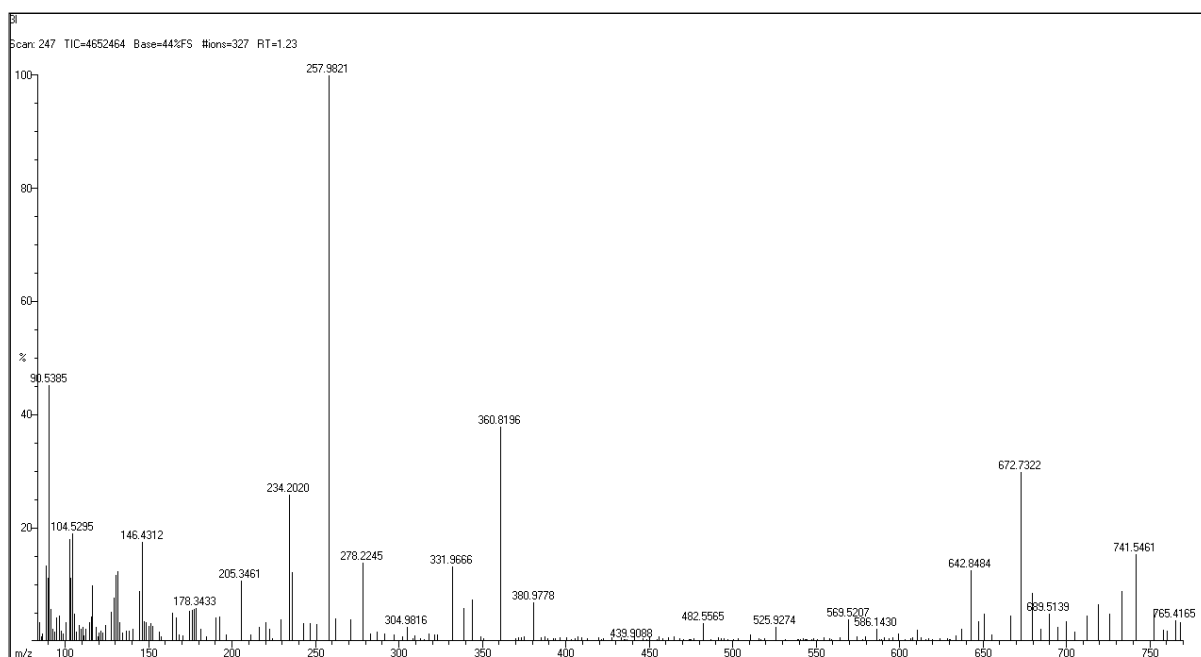

**Figure 99.** Mass spectrum of **3i**

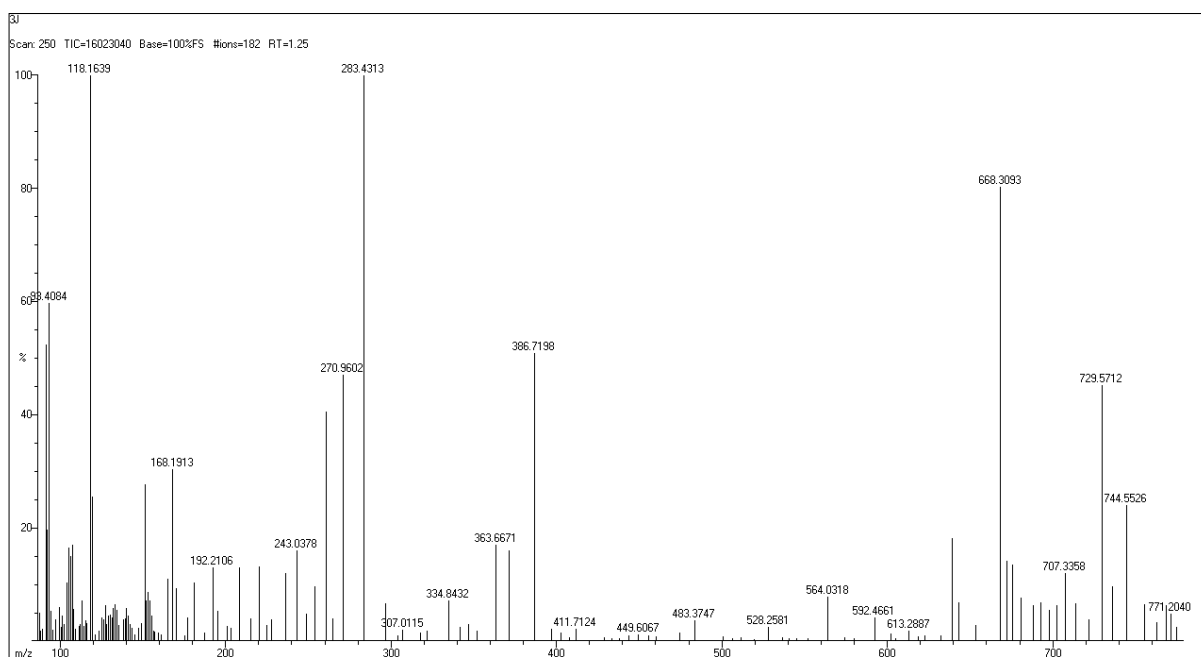

**Figure 100.** Mass spectrum of **3j**

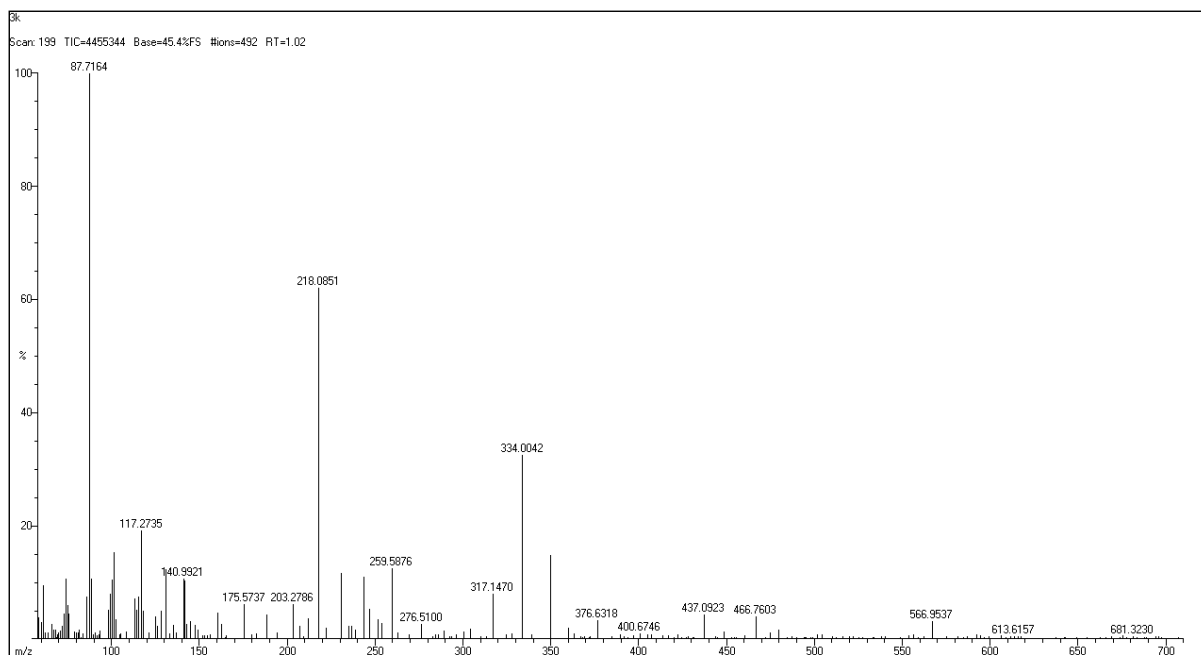

**Figure 101.** Mass spectrum of **3k**

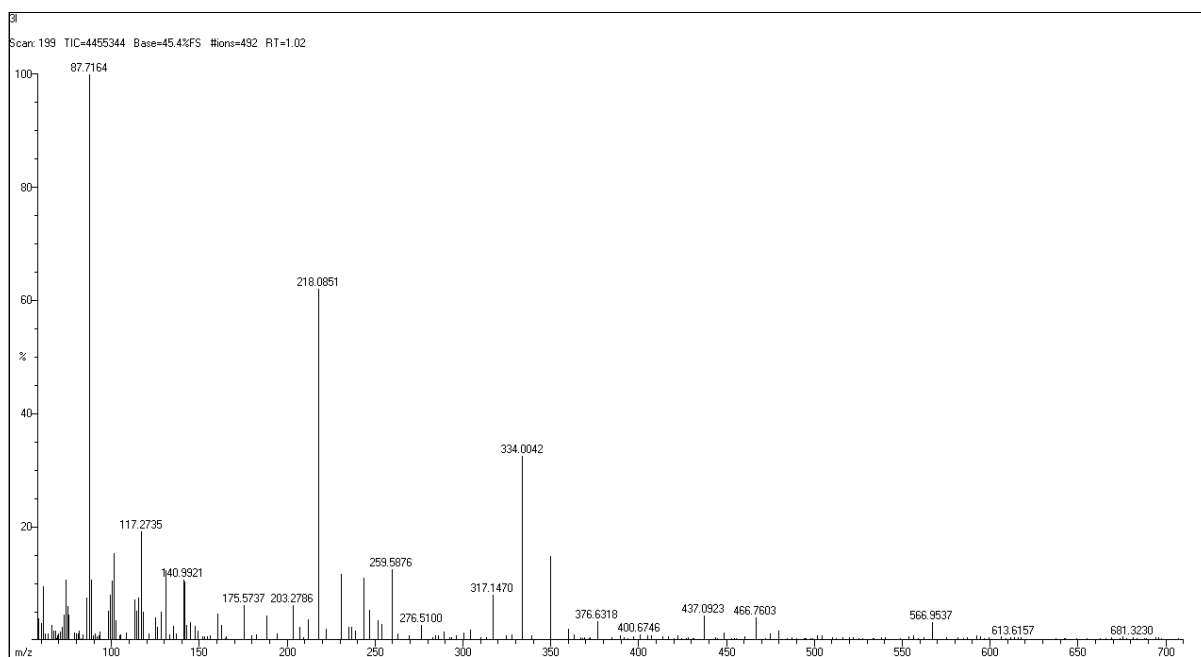

**Figure 102.** Mass spectrum of **3l**

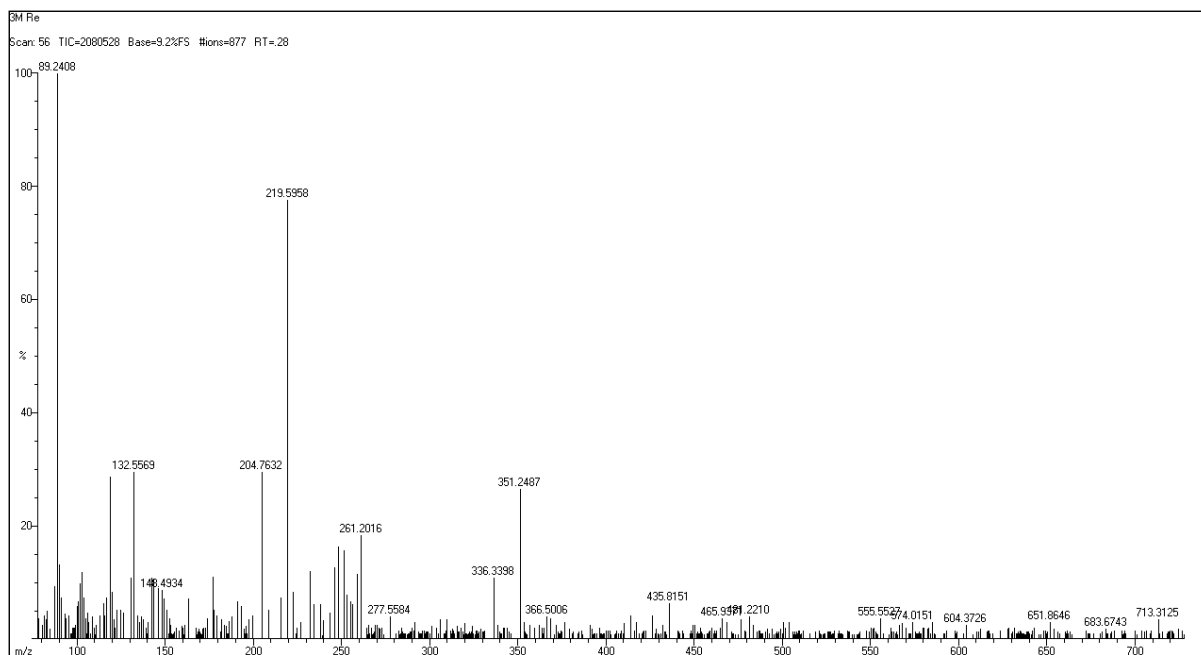

Figure 103. Mass spectrum of 3m

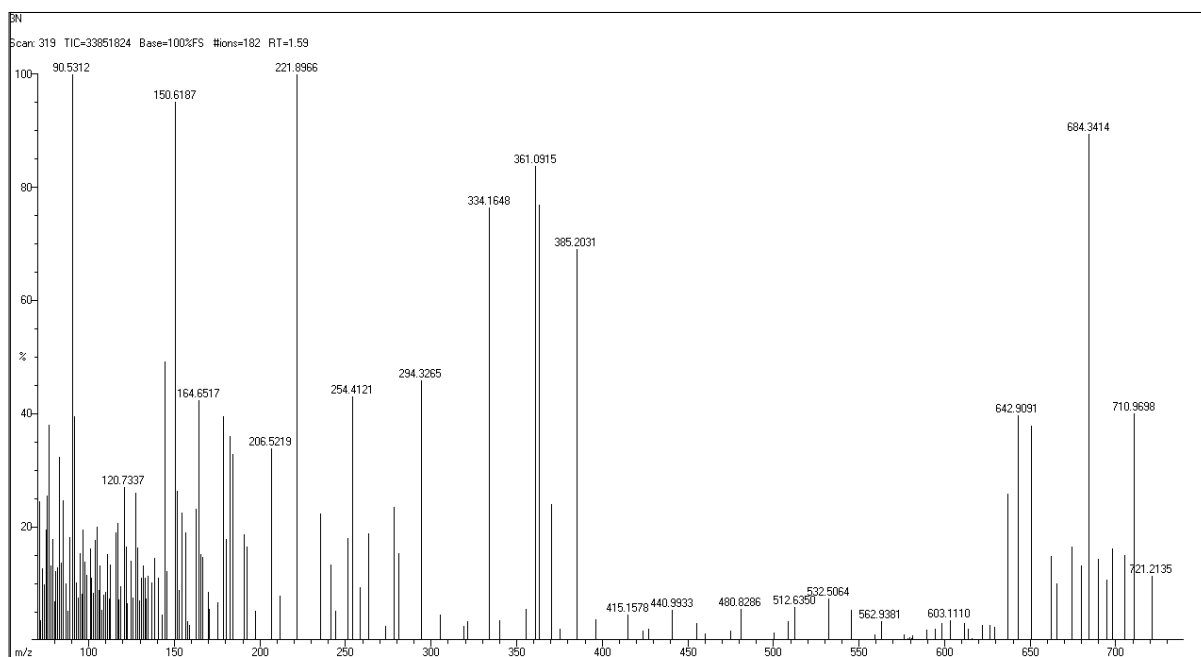

Figure 104. Mass spectrum of 3n

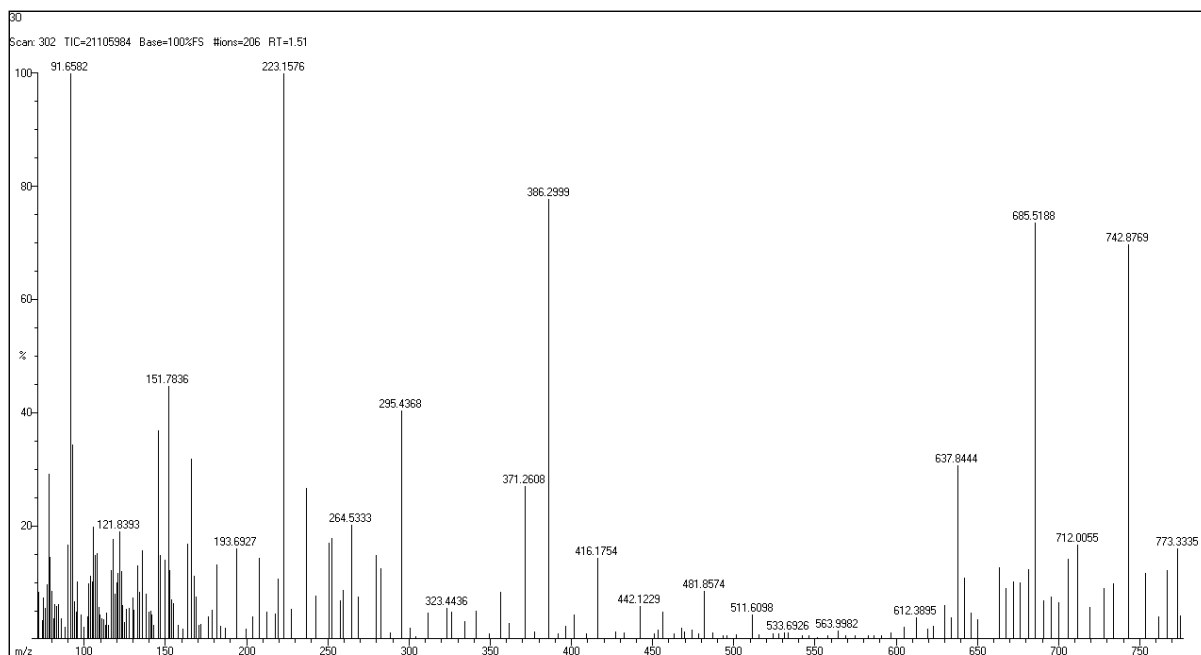

**Figure 105.** Mass spectrum of **3o**

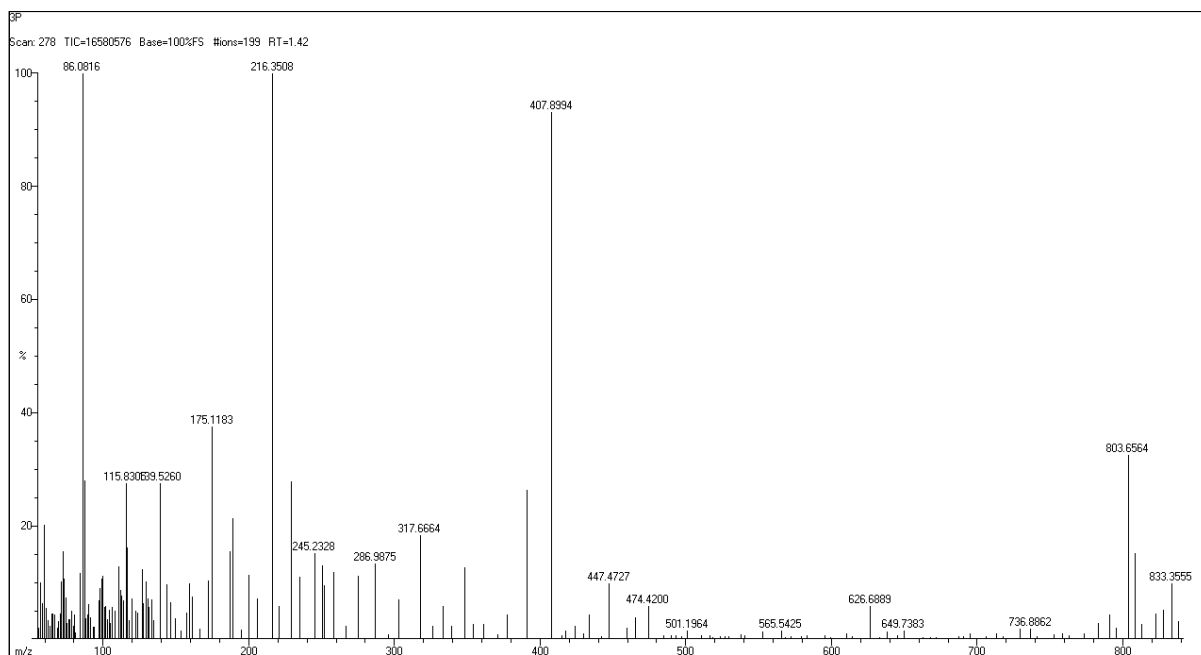

**Figure 106.** Mass spectrum of **3p**

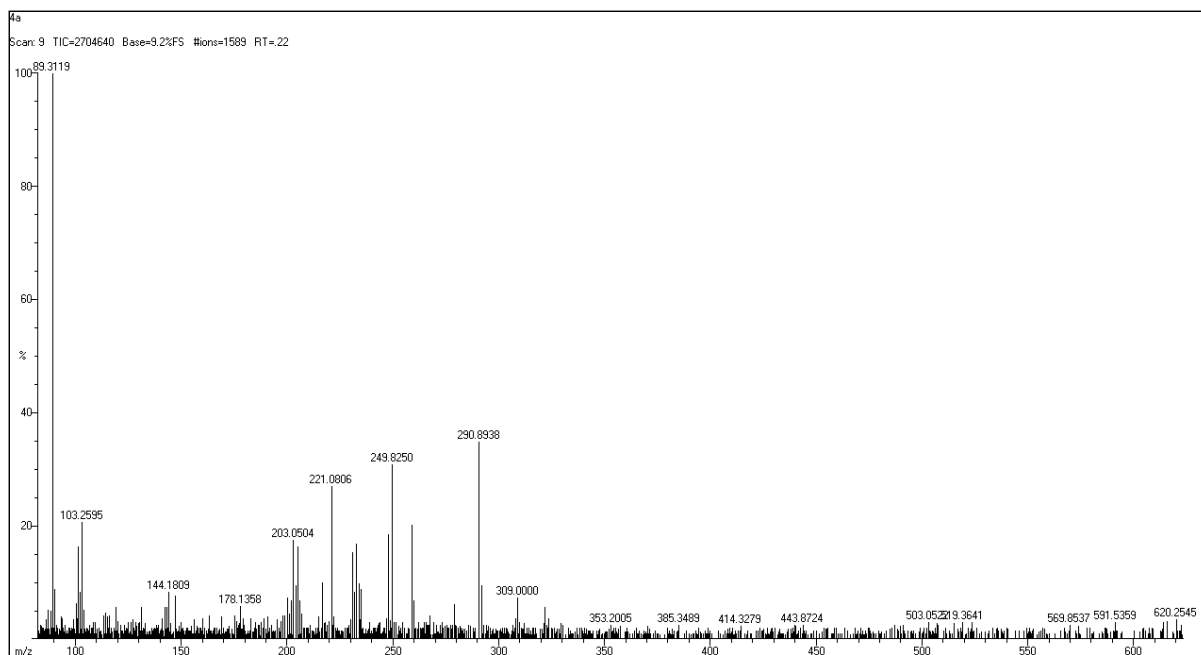

**Figure 107.** Mass spectrum of **5a**

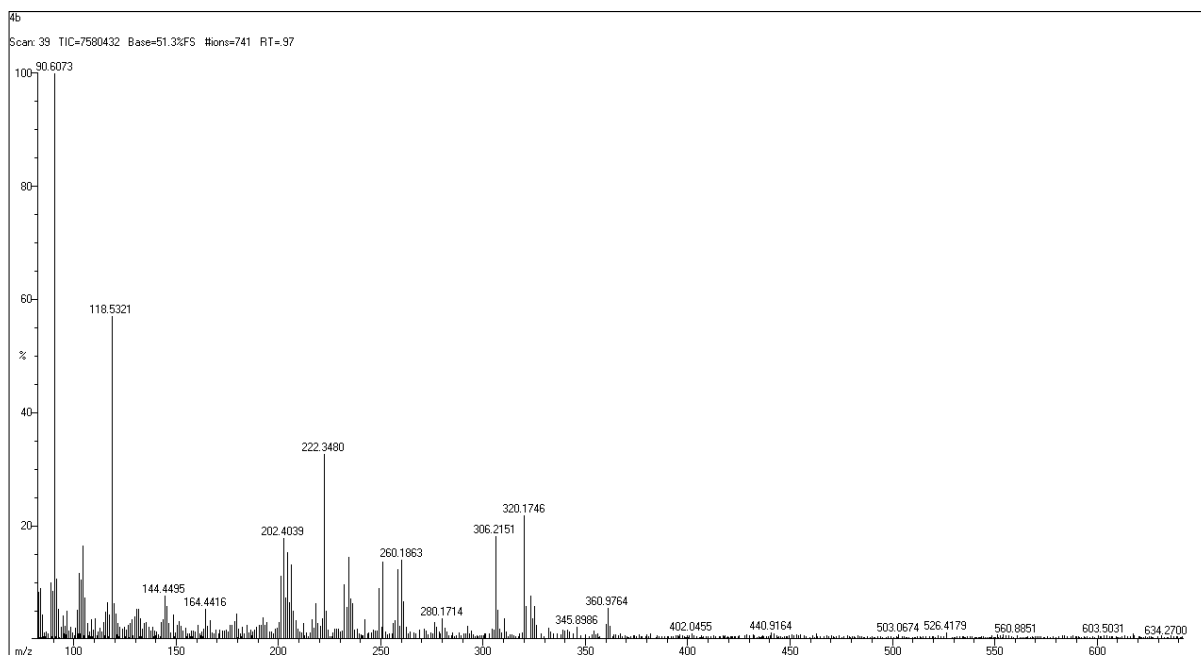

**Figure 108.** Mass spectrum of **5b**

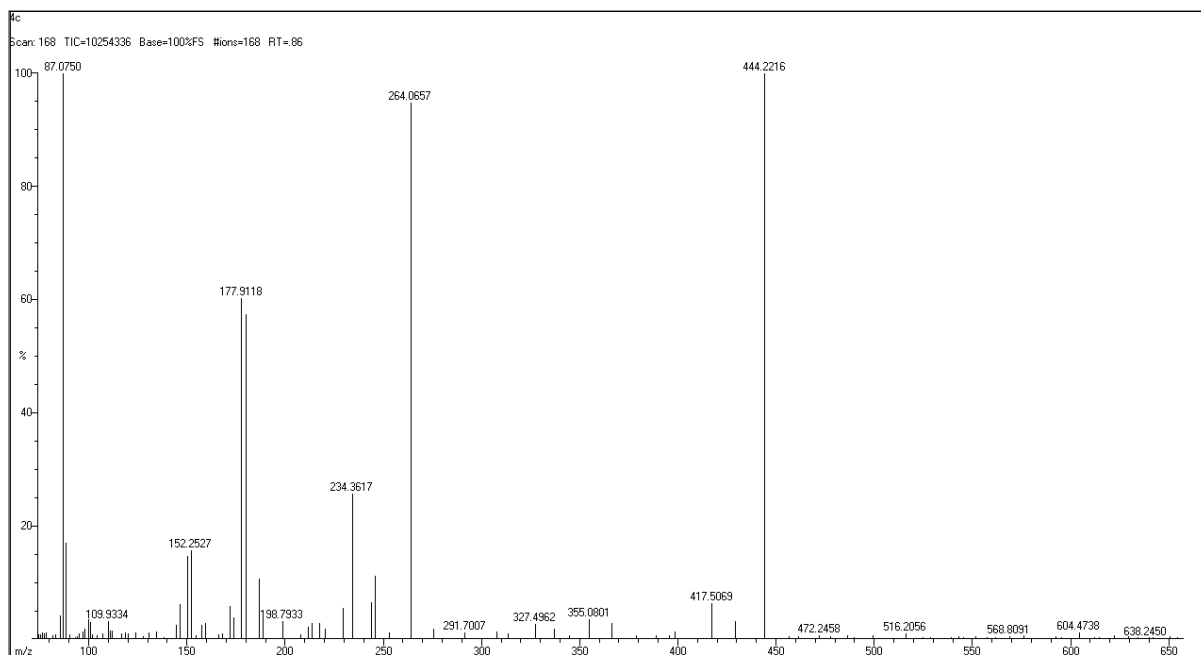

Figure 109. Mass spectrum of 5c

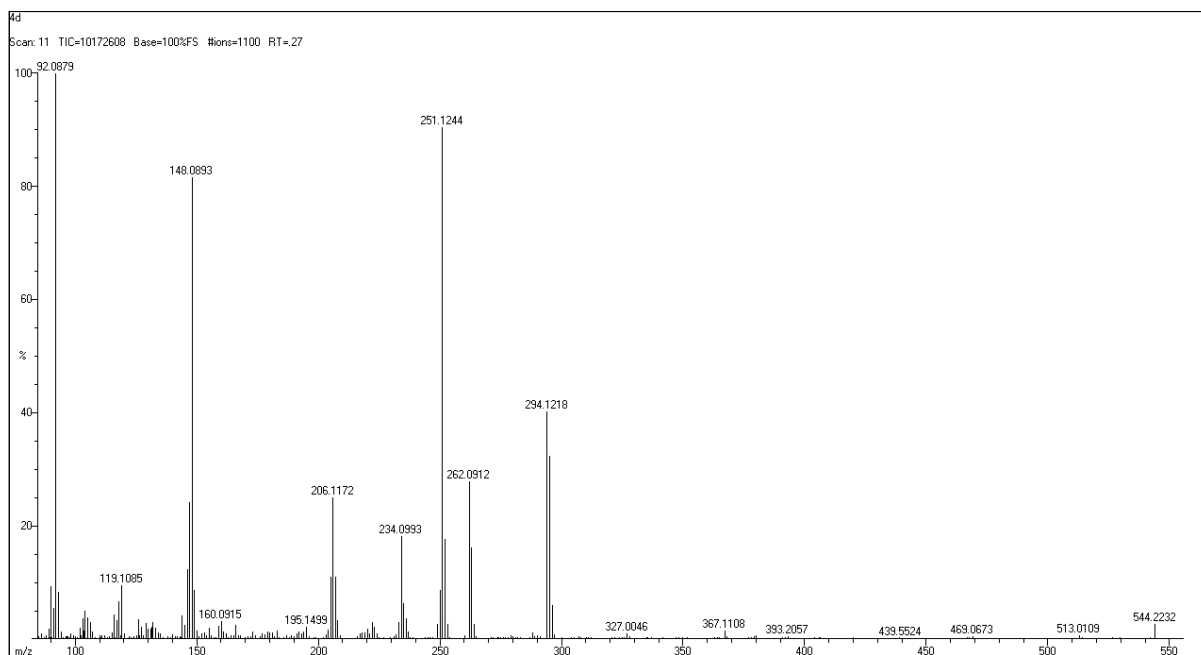

Figure 110. Mass spectrum of 5d



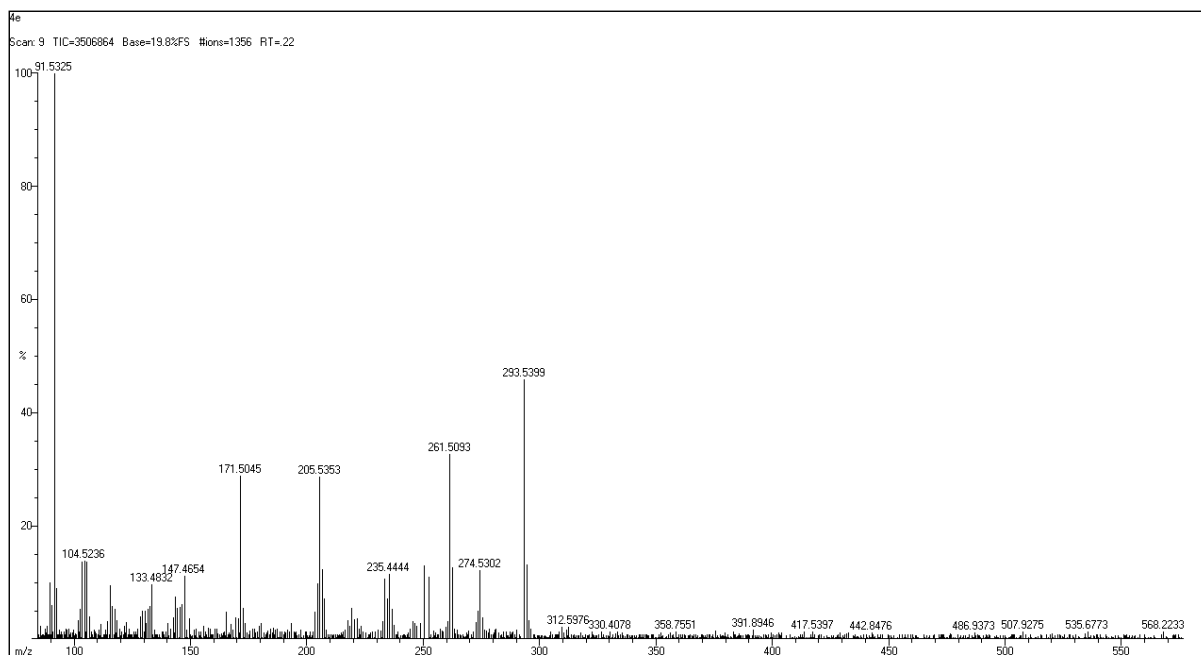

Figure 111. Mass spectrum of 5e

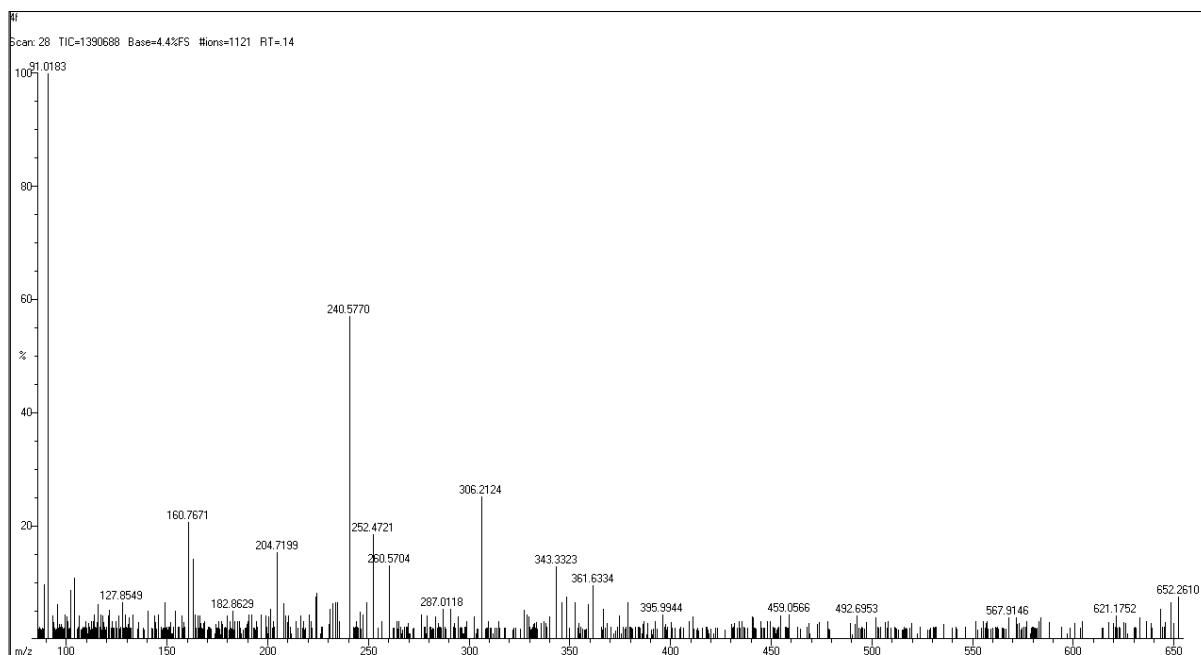

Figure 112. Mass spectrum of 5f

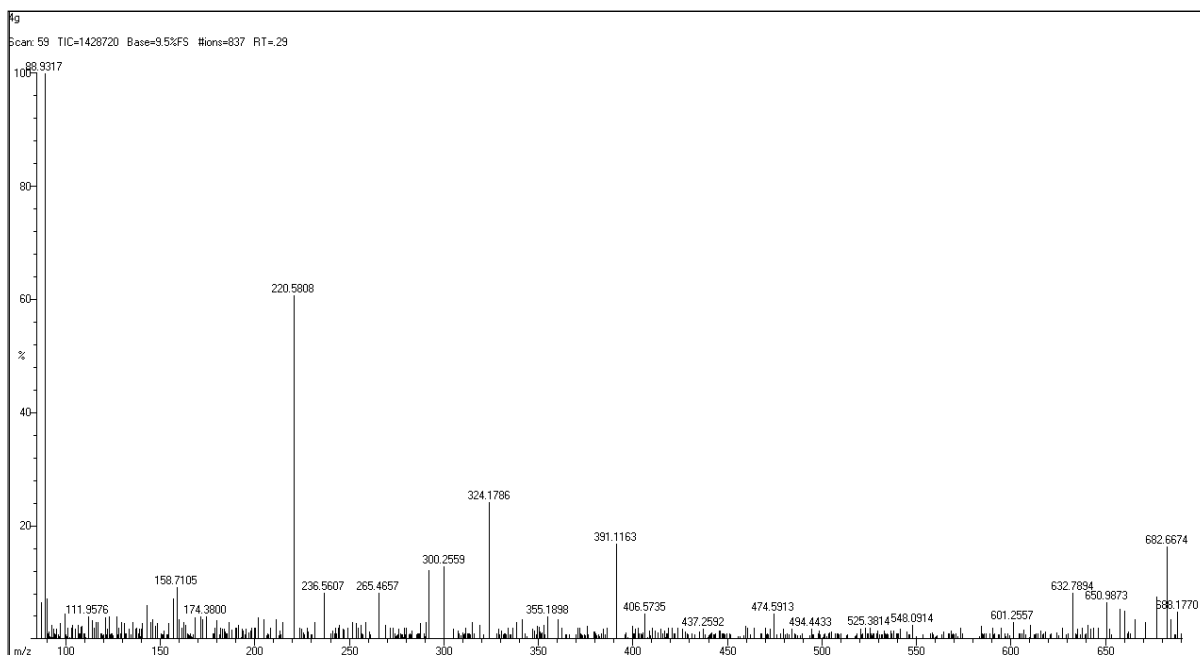

Figure 113. Mass spectrum of 5g

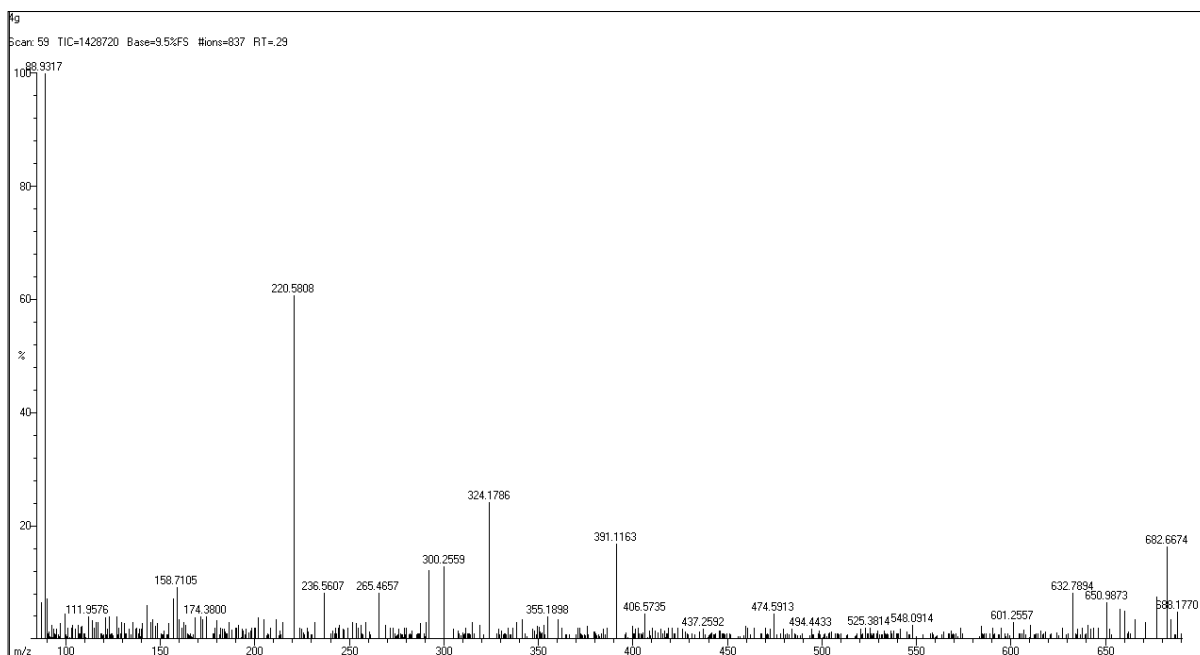

Figure 114. Mass spectrum of 7a

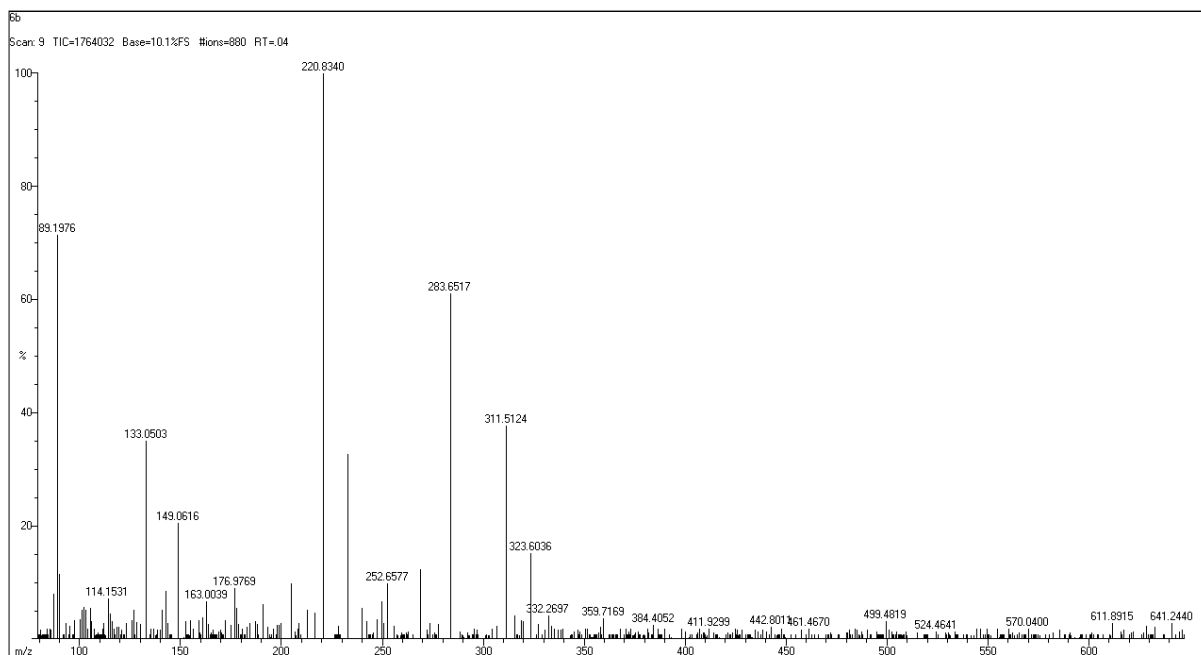

Figure 115. Mass spectrum of 7b

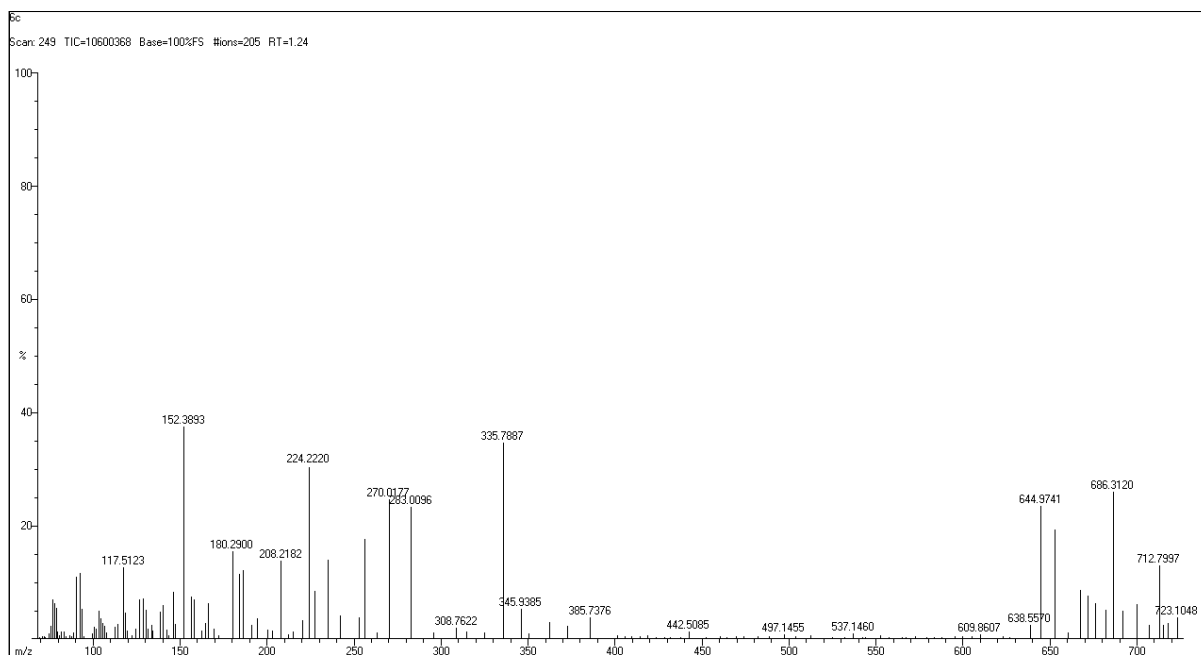

Figure 116. Mass spectrum of 7c

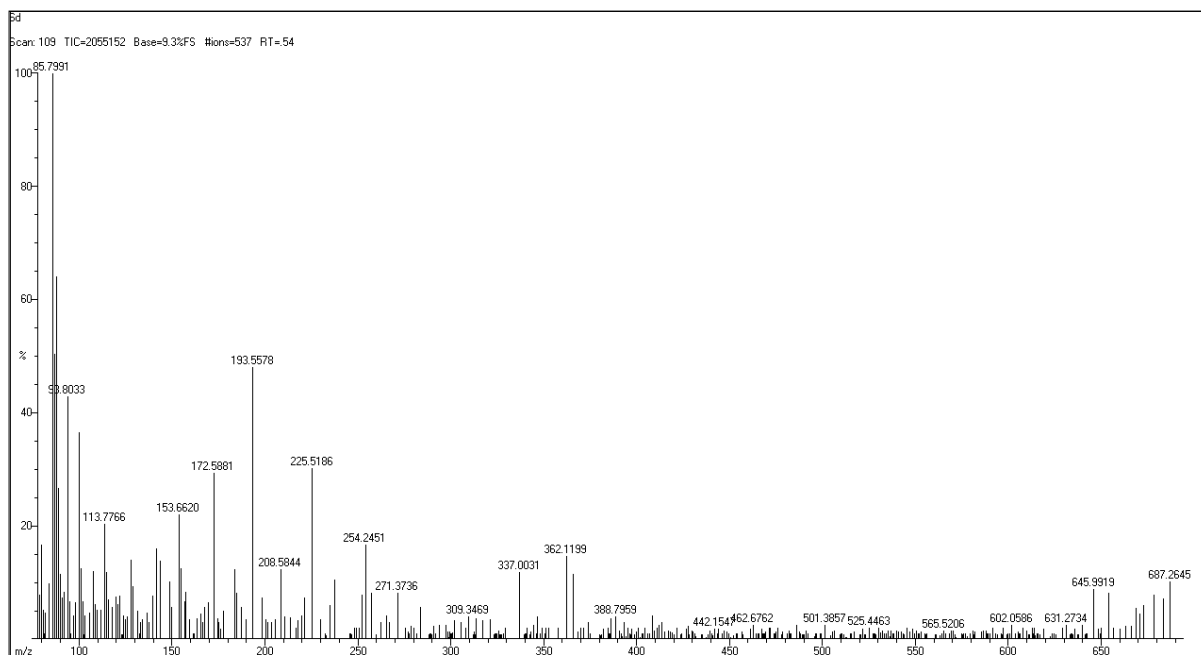

Figure 117. Mass spectrum of 7d

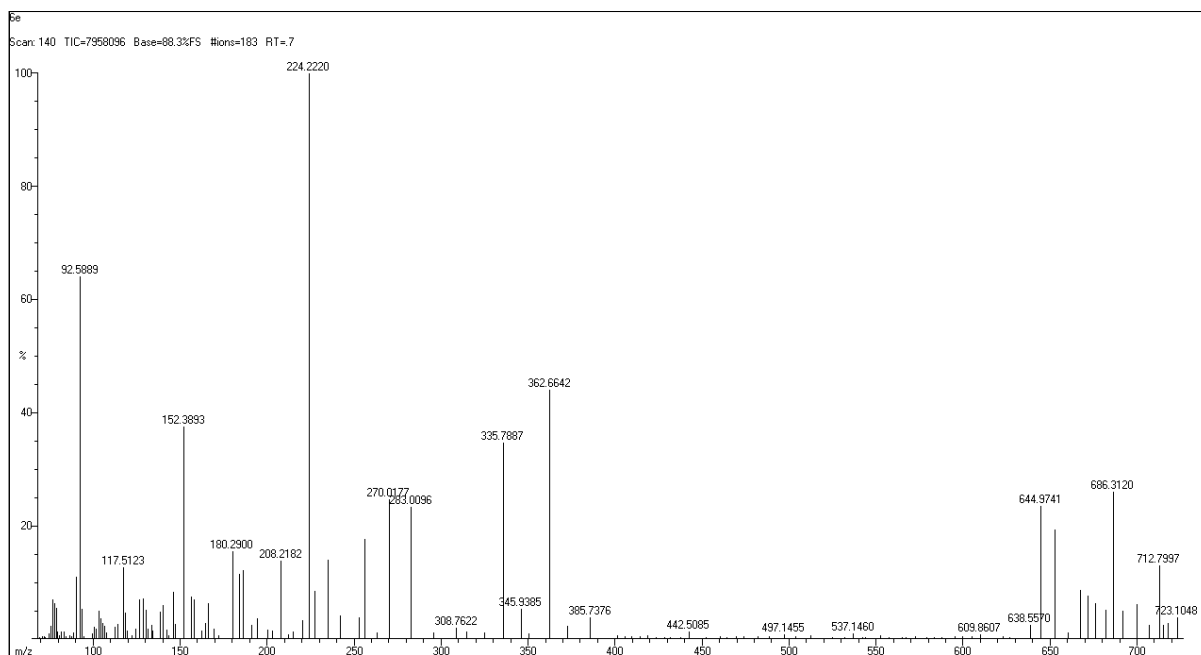

Figure 118. Mass spectrum of 7e

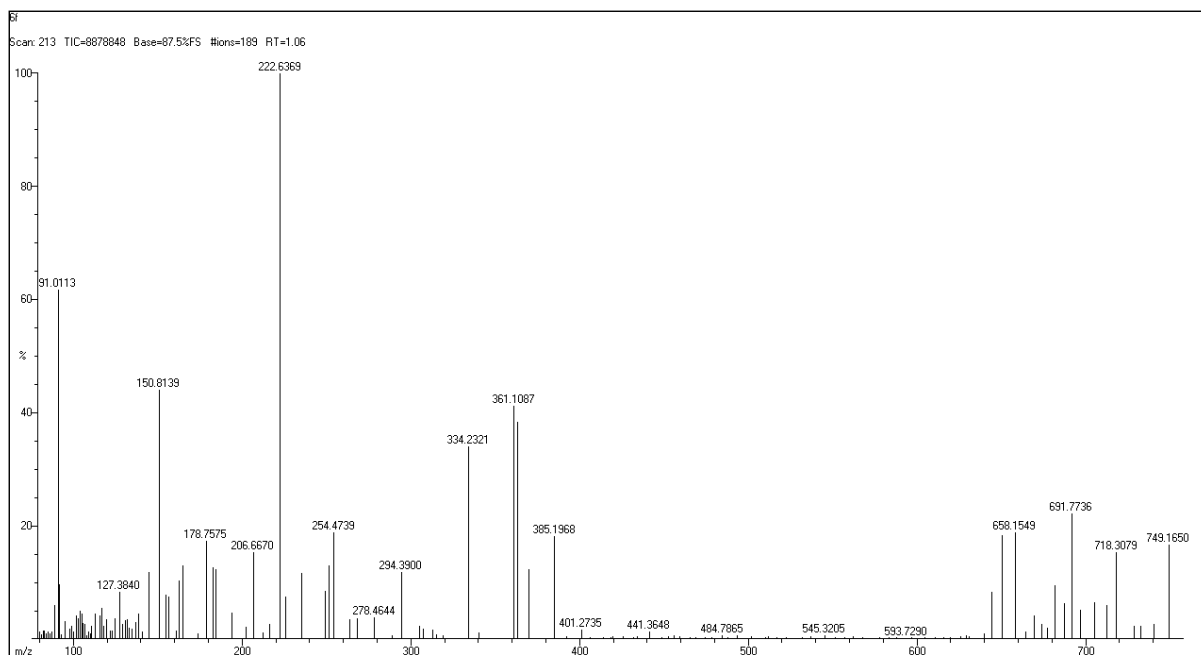

**Figure 119.** Mass spectrum of **7f**

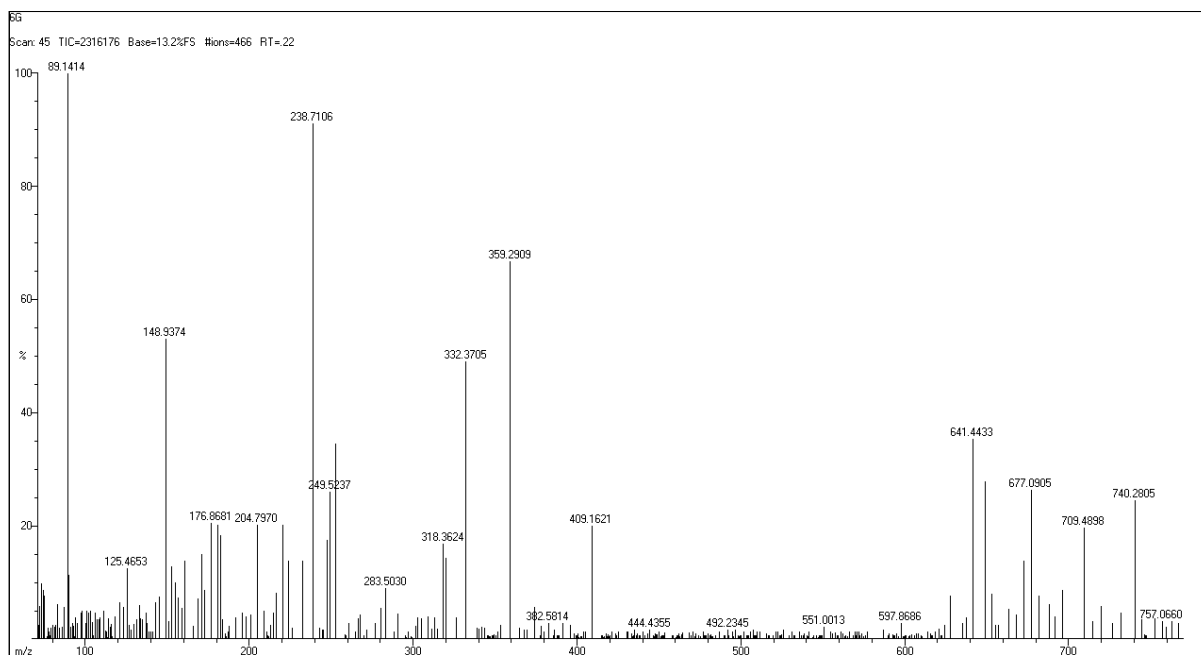

**Figure 120.** Mass spectrum of **7g**



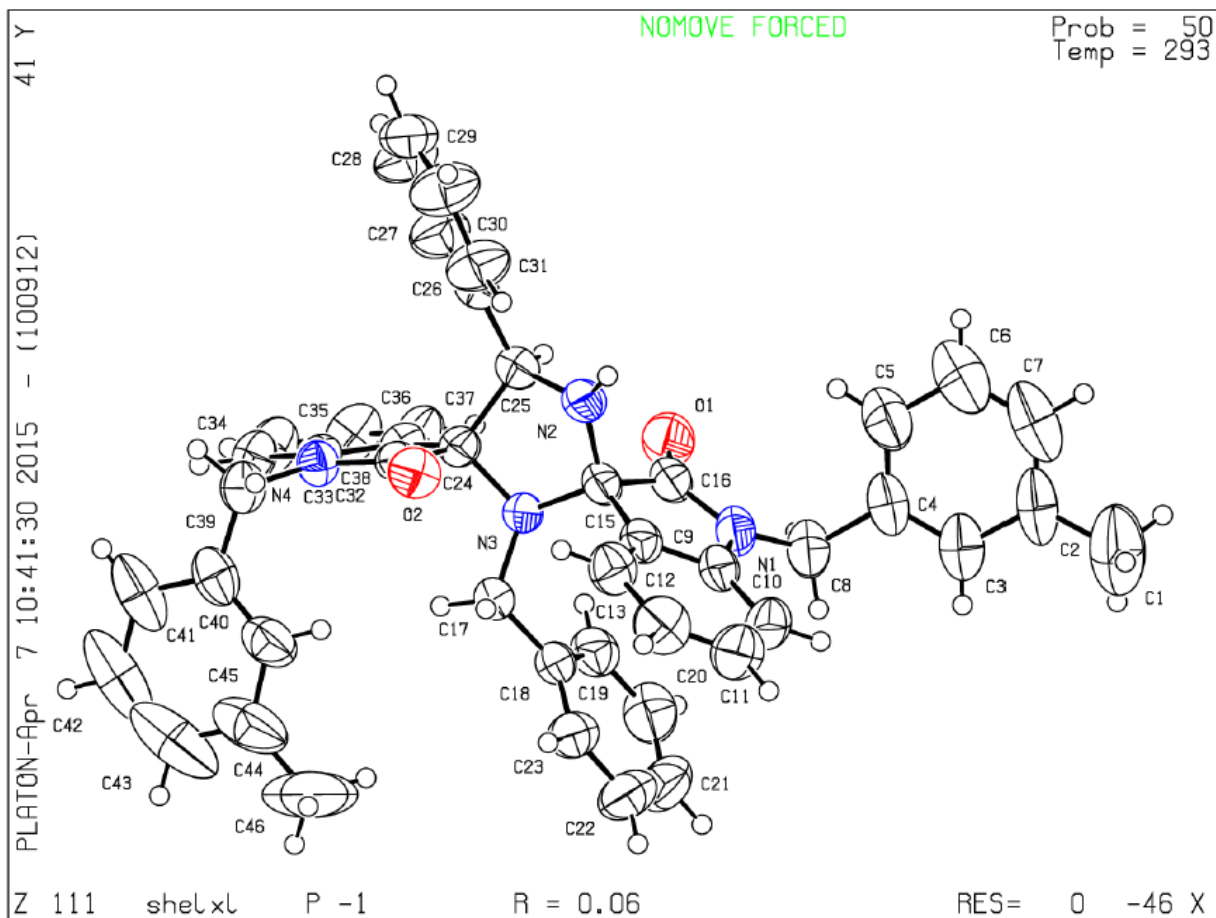

ORTEP diagram of compound 3a

## Single crystal XRD data of 5a

**Table 2. Crystal data and structure refinement for 5a**

|                                   |                                                                                                                      |
|-----------------------------------|----------------------------------------------------------------------------------------------------------------------|
| Identification code               | 5a                                                                                                                   |
| Empirical formula                 | C40 H33 N3 O4                                                                                                        |
| Formula weight                    | 619.69                                                                                                               |
| Temperature                       | 296(2) K                                                                                                             |
| Wavelength                        | 0.71073 Å                                                                                                            |
| Crystal system, space group       | Monoclinic, P2/n                                                                                                     |
| Unit cell dimensions              | a = 22.523(2) Å    alpha = 90 deg.<br>b = 8.9345(7) Å    beta = 105.100(3) deg.<br>c = 32.983(3) Å    gamma = 90 deg |
| Volume                            | 6408.2(10) Å <sup>3</sup>                                                                                            |
| Z, Calculated density             | 8, 1.285 Mg/m <sup>3</sup>                                                                                           |
| Absorption coefficient            | 0.084 mm <sup>-1</sup>                                                                                               |
| F(000)                            | 2608                                                                                                                 |
| Crystal size                      | 0.250 x 0.220 x 0.150 mm                                                                                             |
| Theta range for data collection   | 0.987 to 23.481 deg.                                                                                                 |
| Limiting indices                  | -24<=h<=25, -9<=k<=9, -36<=l<=34                                                                                     |
| Reflections collected / unique    | 22466 / 22466 [R(int) = ?]                                                                                           |
| Completeness to theta = 23.481    | 97.6 %                                                                                                               |
| Absorption correction             | None                                                                                                                 |
| Refinement method                 | Full-matrix least-squares on F <sup>2</sup>                                                                          |
| Data / restraints / parameters    | 22466 / 0 / 859                                                                                                      |
| Goodness-of-fit on F <sup>2</sup> | 1.062                                                                                                                |
| Final R indices [I>2sigma(I)]     | R1 = 0.0757, wR2 = 0.2041                                                                                            |
| R indices (all data)              | R1 = 0.1188, wR2 = 0.2449                                                                                            |
| Extinction coefficient            | 0.0008(3)                                                                                                            |
| Largest diff. peak and hole       | 0.274 and -0.280 e.Å <sup>-3</sup>                                                                                   |



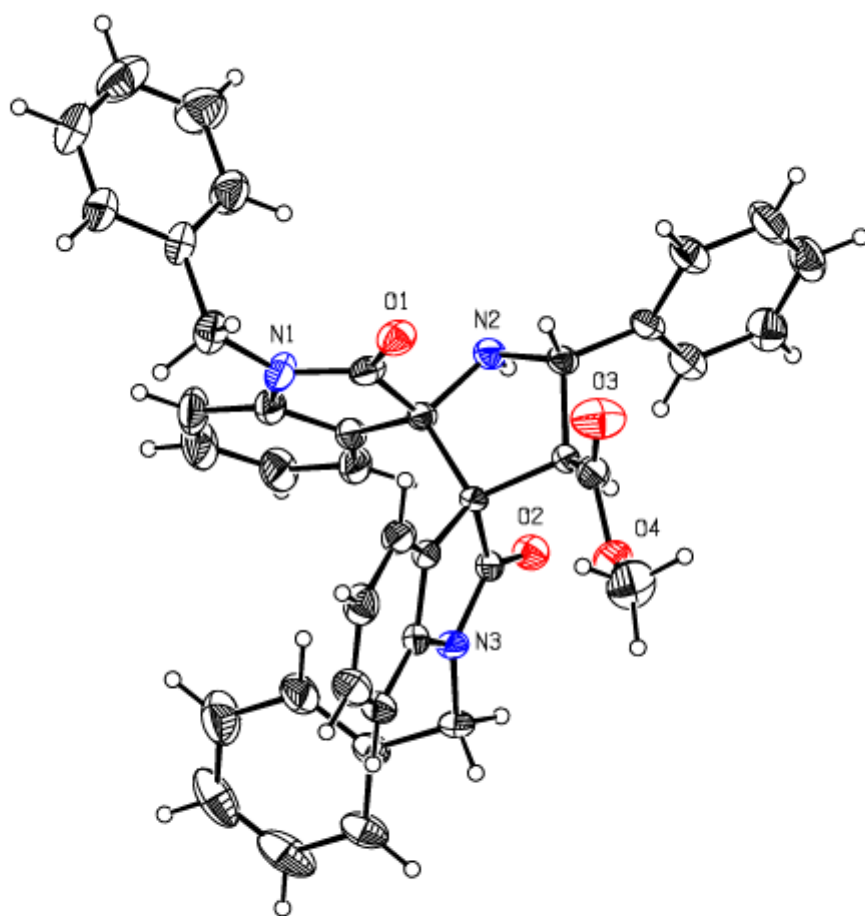

**ORTEP diagram of compound 5a**
